# Supplementary material for: T2DB: A Web Database for Long Non-Coding RNA Genes in Type II Diabetes
Source: Noncoding RNA. 2023 May 8;9(3):30. doi: 10.3390/ncrna9030030 (PMC10204529; doi:10.3390/ncrna9030030)
Supplement: Supplementary file 1 [file ncrna-09-00030-s001.zip › ncrna-2337344-supplementary proofreading back/ncrna-2337344-supplementary revised back.xlsx]

## Sheet: Table_S1
Supplementary Table S1. List of differentially expressed genes in T2D, T3cD and IGT compared to control subjects
			T2D vs Control			T3cD vs Control			IGT vs Control
Ensembl Gene ID	Gene Symbol	Biotype	logFC	FDR	Expression	logFC	FDR	Expression	logFC	FDR	Expression
ENSG00000000971	CFH	protein_coding	1.8577	0.00771089	Up-regulated	2.08094	0.00188516	Up-regulated	1.5033	0.429007	Unchanged
ENSG00000002726	AOC1	protein_coding	1.38961	0.0838308	Unchanged	1.82677	0.0261745	Up-regulated	1.0087	0.724513	Unchanged
ENSG00000002746	HECW1	protein_coding	2.80599	0.0304638	Up-regulated	1.62172	0.596534	Unchanged	1.72906	0.483679	Unchanged
ENSG00000003400	CASP10	protein_coding	0.747333	0.455836	Unchanged	1.27563	0.0333056	Up-regulated	0.774706	0.694906	Unchanged
ENSG00000003436	TFPI	protein_coding	0.62916	0.282919	Unchanged	1.11665	0.0234482	Up-regulated	0.936208	0.35848	Unchanged
ENSG00000010282	HHATL	protein_coding	-1.51766	0.000100123	Down-regulated	-0.701544	0.389138	Unchanged	0.00759728	1	Unchanged
ENSG00000010327	STAB1	protein_coding	1.52111	0.0284265	Up-regulated	1.29701	0.104557	Unchanged	1.28282	0.298713	Unchanged
ENSG00000010610	CD4	protein_coding	0.886082	0.196099	Unchanged	1.37938	0.014475	Up-regulated	1.1006	0.394232	Unchanged
ENSG00000010932	FMO1	protein_coding	1.57119	0.0228317	Up-regulated	1.84447	0.00104554	Up-regulated	0.783585	0.820603	Unchanged
ENSG00000011028	MRC2	protein_coding	1.43387	0.101531	Unchanged	1.49077	0.0181791	Up-regulated	1.60387	0.298713	Unchanged
ENSG00000011600	TYROBP	protein_coding	1.21291	0.112188	Unchanged	1.67665	0.00934163	Up-regulated	0.82044	0.713241	Unchanged
ENSG00000012223	LTF	protein_coding	1.49812	0.222692	Unchanged	2.32016	0.036773	Up-regulated	1.34627	0.589718	Unchanged
ENSG00000017427	IGF1	protein_coding	1.80635	0.0399606	Up-regulated	1.24332	0.222694	Unchanged	1.4749	0.415154	Unchanged
ENSG00000019582	CD74	protein_coding	1.29492	0.0294417	Up-regulated	1.89071	0.000242996	Up-regulated	1.06867	0.39422	Unchanged
ENSG00000020633	RUNX3	protein_coding	1.76488	0.0343379	Up-regulated	2.0588	0.0111231	Up-regulated	0.932035	0.844722	Unchanged
ENSG00000022355	GABRA1	protein_coding	-1.71442	0.0268754	Down-regulated	-1.65234	0.110929	Unchanged	-0.652622	0.858245	Unchanged
ENSG00000024422	EHD2	protein_coding	1.3111	0.025905	Up-regulated	1.36414	0.0154282	Up-regulated	1.13417	0.439278	Unchanged
ENSG00000026025	VIM	protein_coding	1.36948	0.010482	Up-regulated	1.49661	0.00140986	Up-regulated	1.22145	0.338646	Unchanged
ENSG00000026103	FAS	protein_coding	1.16997	0.00306373	Up-regulated	1.07401	0.00620491	Up-regulated	0.767154	0.35848	Unchanged
ENSG00000026751	SLAMF7	protein_coding	2.08724	0.205429	Unchanged	3.82048	0.000448024	Up-regulated	2.02618	0.469202	Unchanged
ENSG00000028137	TNFRSF1B	protein_coding	0.868763	0.494638	Unchanged	1.46545	0.0396241	Up-regulated	1.25254	0.41155	Unchanged
ENSG00000031081	ARHGAP31	protein_coding	0.824382	0.226643	Unchanged	1.08179	0.0339689	Up-regulated	0.828944	0.721272	Unchanged
ENSG00000038427	VCAN	protein_coding	1.69473	0.0264997	Up-regulated	1.90209	0.00613985	Up-regulated	1.3178	0.469879	Unchanged
ENSG00000038945	MSR1	protein_coding	1.36997	0.0942968	Unchanged	1.61691	0.00723754	Up-regulated	0.777467	0.844722	Unchanged
ENSG00000042493	CAPG	protein_coding	1.42712	0.0570501	Unchanged	2.0792	0.00588097	Up-regulated	0.71121	0.858245	Unchanged
ENSG00000043462	LCP2	protein_coding	1.19537	0.240217	Unchanged	1.78371	0.00475574	Up-regulated	1.15351	0.563734	Unchanged
ENSG00000044524	EPHA3	protein_coding	1.17207	0.264646	Unchanged	1.77112	0.00765459	Up-regulated	0.807215	0.915524	Unchanged
ENSG00000047648	ARHGAP6	protein_coding	1.51697	0.128333	Unchanged	1.87828	0.0111231	Up-regulated	1.69073	0.167923	Unchanged
ENSG00000049540	ELN	protein_coding	1.16832	0.0777673	Unchanged	1.15301	0.0464613	Up-regulated	0.738582	0.517053	Unchanged
ENSG00000050165	DKK3	protein_coding	1.93303	1.36882e-10	Up-regulated	1.55984	0.000528392	Up-regulated	1.02867	0.467607	Unchanged
ENSG00000051341	POLQ	protein_coding	1.40105	0.00758854	Up-regulated	1.5521	0.065246	Unchanged	0.581248	0.934191	Unchanged
ENSG00000054598	FOXC1	protein_coding	1.16971	0.300368	Unchanged	1.87048	0.0152824	Up-regulated	0.798869	0.954515	Unchanged
ENSG00000057657	PRDM1	protein_coding	0.698725	0.383616	Unchanged	1.33801	0.0449477	Up-regulated	0.742555	0.808023	Unchanged
ENSG00000060718	COL11A1	protein_coding	2.30751	0.0346409	Up-regulated	1.86373	0.235734	Unchanged	1.27877	0.574066	Unchanged
ENSG00000064300	NGFR	protein_coding	1.79934	0.0254593	Up-regulated	1.56857	0.0392403	Up-regulated	1.14306	0.467607	Unchanged
ENSG00000065320	NTN1	protein_coding	-1.28029	0.00831329	Down-regulated	-0.70284	0.253325	Unchanged	-0.00106393	1	Unchanged
ENSG00000066294	CD84	protein_coding	1.80281	0.0424238	Up-regulated	1.95232	0.0135149	Up-regulated	0.959532	0.669915	Unchanged
ENSG00000069424	KCNAB2	protein_coding	1.38281	6.11394e-05	Up-regulated	0.932894	0.0379625	Unchanged	0.399122	0.842302	Unchanged
ENSG00000069493	CLEC2D	protein_coding	1.43543	0.00986	Up-regulated	1.20476	0.137558	Unchanged	1.00437	0.469202	Unchanged
ENSG00000072952	IRAG1	protein_coding	1.25832	0.101569	Unchanged	1.49727	0.0111231	Up-regulated	1.18286	0.445938	Unchanged
ENSG00000073331	ALPK1	protein_coding	1.36164	0.0837074	Unchanged	1.49229	0.00299981	Up-regulated	0.607294	0.884757	Unchanged
ENSG00000074181	NOTCH3	protein_coding	1.07223	0.198814	Unchanged	1.61914	0.00934163	Up-regulated	1.34535	0.36359	Unchanged
ENSG00000074219	TEAD2	protein_coding	0.65434	0.659531	Unchanged	1.39505	0.0474934	Up-regulated	0.83059	0.678089	Unchanged
ENSG00000075429	CACNG5	protein_coding	1.06848	0.00936727	Up-regulated	0.416389	0.706969	Unchanged	0.140887	1	Unchanged
ENSG00000075884	ARHGAP15	protein_coding	1.08134	0.084352	Unchanged	1.47784	0.0450251	Up-regulated	1.13091	0.381886	Unchanged
ENSG00000077238	IL4R	protein_coding	0.949393	0.257046	Unchanged	1.5424	0.00733191	Up-regulated	1.13938	0.469202	Unchanged
ENSG00000077942	FBLN1	protein_coding	1.68671	0.00702289	Up-regulated	1.65542	0.00629824	Up-regulated	1.83067	0.262407	Unchanged
ENSG00000078401	EDN1	protein_coding	1.24384	0.169037	Unchanged	1.76598	0.0117376	Up-regulated	1.10005	0.581852	Unchanged
ENSG00000079931	MOXD1	protein_coding	1.5391	0.105423	Unchanged	1.71525	0.0263907	Up-regulated	1.01448	0.684392	Unchanged
ENSG00000081181	ARG2	protein_coding	-1.77023	4.72591e-14	Down-regulated	-1.0317	0.00608028	Down-regulated	-0.189022	1	Unchanged
ENSG00000081237	PTPRC	protein_coding	1.76777	0.00986	Up-regulated	2.09029	0.00188516	Up-regulated	1.20437	0.469202	Unchanged
ENSG00000082074	FYB1	protein_coding	1.26404	0.153082	Unchanged	1.89447	0.00740116	Up-regulated	1.08707	0.570279	Unchanged
ENSG00000084093	REST	protein_coding	0.815188	0.362613	Unchanged	1.21984	0.0142039	Up-regulated	0.475748	0.902057	Unchanged
ENSG00000087245	MMP2	protein_coding	1.94144	0.00398138	Up-regulated	1.81598	0.00436522	Up-regulated	1.71079	0.230324	Unchanged
ENSG00000087253	LPCAT2	protein_coding	1.49737	0.0544188	Unchanged	1.68585	0.0236648	Up-regulated	1.02612	0.722284	Unchanged
ENSG00000088827	SIGLEC1	protein_coding	2.65199	0.0831987	Unchanged	2.88709	0.0087324	Up-regulated	3.30792	0.0902108	Unchanged
ENSG00000088882	CPXM1	protein_coding	2.62421	0.0456815	Up-regulated	3.0649	0.00245242	Up-regulated	2.63979	0.429128	Unchanged
ENSG00000089012	SIRPG	protein_coding	3.15303	0.190669	Unchanged	5.10555	0.00630263	Up-regulated	3.0807	0.49893	Unchanged
ENSG00000090382	LYZ	protein_coding	2.12368	0.0343379	Up-regulated	2.03585	0.176601	Unchanged	2.03757	0.35848	Unchanged
ENSG00000091128	LAMB4	protein_coding	-1.21928	0.0220939	Down-regulated	-0.891859	0.405814	Unchanged	-0.0249052	1	Unchanged
ENSG00000091137	SLC26A4	protein_coding	1.37714	0.00489011	Up-regulated	0.76435	0.37651	Unchanged	-0.0477598	1	Unchanged
ENSG00000091592	NLRP1	protein_coding	1.31471	0.037056	Up-regulated	1.11946	0.198254	Unchanged	1.32612	0.298713	Unchanged
ENSG00000091986	CCDC80	protein_coding	1.92738	0.0124236	Up-regulated	1.71533	0.0109647	Up-regulated	2.28217	0.156853	Unchanged
ENSG00000092009	CMA1	protein_coding	4.22675	0.00831329	Up-regulated	3.76201	0.102309	Unchanged	2.88935	0.469202	Unchanged
ENSG00000094755	GABRP	protein_coding	3.31408	0.0183248	Up-regulated	3.74365	0.00934163	Up-regulated	1.82018	0.792318	Unchanged
ENSG00000095970	TREM2	protein_coding	1.78731	0.301761	Unchanged	3.16153	0.0132696	Up-regulated	0.640676	1	Unchanged
ENSG00000099282	TSPAN15	protein_coding	1.22246	0.113275	Unchanged	1.52926	0.0457217	Up-regulated	0.541893	0.972317	Unchanged
ENSG00000100055	CYTH4	protein_coding	1.58176	0.0633873	Unchanged	1.73445	0.026426	Up-regulated	1.21437	0.409851	Unchanged
ENSG00000100097	LGALS1	protein_coding	1.21948	0.0828431	Unchanged	1.43129	0.0111055	Up-regulated	1.20413	0.469202	Unchanged
ENSG00000100311	PDGFB	protein_coding	0.820912	0.132716	Unchanged	1.07793	0.0391901	Up-regulated	1.15271	0.227247	Unchanged
ENSG00000100365	NCF4	protein_coding	1.48902	0.0810399	Unchanged	1.69692	0.0138247	Up-regulated	1.17037	0.483679	Unchanged
ENSG00000100448	CTSG	protein_coding	2.46793	0.057156	Unchanged	2.67403	0.036371	Up-regulated	2.29375	0.331924	Unchanged
ENSG00000101443	WFDC2	protein_coding	0.862409	0.0522499	Unchanged	1.21411	0.00540159	Up-regulated	0.48033	0.90577	Unchanged
ENSG00000101445	PPP1R16B	protein_coding	1.53994	0.0148619	Up-regulated	1.10726	0.289783	Unchanged	1.17162	0.426213	Unchanged
ENSG00000101842	VSIG1	protein_coding	3.86067	0.0183248	Up-regulated	4.01186	0.273657	Unchanged	1.3694	0.989589	Unchanged
ENSG00000101955	SRPX	protein_coding	1.67043	0.0315785	Up-regulated	1.54132	0.0608563	Unchanged	1.31504	0.589718	Unchanged
ENSG00000102048	ASB9	protein_coding	-1.02442	0.010482	Down-regulated	-0.657728	0.318485	Unchanged	-0.150829	1	Unchanged
ENSG00000102359	SRPX2	protein_coding	1.02752	0.293077	Unchanged	1.43133	0.0313684	Up-regulated	1.10585	0.623481	Unchanged
ENSG00000102362	SYTL4	protein_coding	1.34068	0.0360142	Up-regulated	1.29904	0.133337	Unchanged	0.846466	0.663073	Unchanged
ENSG00000102837	OLFM4	protein_coding	2.0895	0.193512	Unchanged	3.45831	0.0109647	Up-regulated	0.163899	1	Unchanged
ENSG00000103490	PYCARD	protein_coding	0.926459	0.225352	Unchanged	1.43002	0.0173296	Up-regulated	0.589266	0.959586	Unchanged
ENSG00000104321	TRPA1	protein_coding	1.73511	0.0434898	Up-regulated	0.59743	0.952123	Unchanged	0.4472	1	Unchanged
ENSG00000104341	LAPTM4B	protein_coding	0.61779	0.0247023	Unchanged	1.06963	0.00475574	Up-regulated	0.339986	0.884757	Unchanged
ENSG00000104894	CD37	protein_coding	1.49859	0.0113846	Up-regulated	1.42592	0.0441799	Up-regulated	0.724093	0.807847	Unchanged
ENSG00000104972	LILRB1	protein_coding	1.48883	0.165839	Unchanged	1.87887	0.0359766	Up-regulated	0.867801	0.858245	Unchanged
ENSG00000105122	RASAL3	protein_coding	0.99076	0.467236	Unchanged	1.79806	0.0374514	Up-regulated	1.58521	0.253215	Unchanged
ENSG00000105366	SIGLEC8	protein_coding	2.68636	0.0163529	Up-regulated	2.35498	0.158997	Unchanged	1.81896	0.678818	Unchanged
ENSG00000105696	TMEM59L	protein_coding	1.05943	0.0480517	Up-regulated	0.35918	0.845135	Unchanged	0.10557	1	Unchanged
ENSG00000105996	HOXA2	protein_coding	1.21387	0.526859	Unchanged	2.21022	0.0365896	Up-regulated	0.757592	1	Unchanged
ENSG00000106178	CCL24	protein_coding	2.92116	0.0852727	Unchanged	3.29346	0.0455324	Up-regulated	3.46606	0.253215	Unchanged
ENSG00000106333	PCOLCE	protein_coding	1.06565	0.0113846	Up-regulated	1.28419	0.000448024	Up-regulated	0.852111	0.469202	Unchanged
ENSG00000106688	SLC1A1	protein_coding	1.08064	0.0166841	Up-regulated	0.803721	0.193144	Unchanged	0.27062	1	Unchanged
ENSG00000106991	ENG	protein_coding	1.11892	0.0311667	Up-regulated	0.81414	0.17497	Unchanged	0.927511	0.41155	Unchanged
ENSG00000107317	PTGDS	protein_coding	1.86088	0.0072839	Up-regulated	1.25819	0.0660491	Unchanged	1.57974	0.323215	Unchanged
ENSG00000107719	PALD1	protein_coding	1.07866	0.285675	Unchanged	1.79528	0.0353245	Up-regulated	0.886593	0.763977	Unchanged
ENSG00000108602	ALDH3A1	protein_coding	4.20691	0.0210351	Up-regulated	3.50903	0.142377	Unchanged	5.25136	0.231289	Unchanged
ENSG00000108821	COL1A1	protein_coding	1.68196	0.0277927	Up-regulated	2.42172	0.00140986	Up-regulated	1.10868	0.646687	Unchanged
ENSG00000108846	ABCC3	protein_coding	1.63871	0.0986284	Unchanged	1.97703	0.0103352	Up-regulated	1.28808	0.469202	Unchanged
ENSG00000109113	RAB34	protein_coding	1.46558	0.0529755	Unchanged	1.52575	0.0127754	Up-regulated	1.48937	0.318833	Unchanged
ENSG00000109163	GNRHR	protein_coding	1.1642	0.0462409	Up-regulated	0.988993	0.195907	Unchanged	0.434579	0.967708	Unchanged
ENSG00000109205	ODAM	protein_coding	3.12846	0.0393953	Up-regulated	2.56263	0.18344	Unchanged	3.0202	0.713241	Unchanged
ENSG00000109861	CTSC	protein_coding	0.552265	0.483004	Unchanged	1.01679	0.0233645	Up-regulated	0.592099	0.615151	Unchanged
ENSG00000110077	MS4A6A	protein_coding	1.28628	0.0675292	Unchanged	1.75048	0.006134	Up-regulated	1.11751	0.483679	Unchanged
ENSG00000110446	SLC15A3	protein_coding	1.53572	0.0456815	Up-regulated	1.75174	0.0154282	Up-regulated	1.51476	0.307045	Unchanged
ENSG00000110848	CD69	protein_coding	1.36938	0.340184	Unchanged	2.29494	0.0375441	Up-regulated	2.01477	0.267498	Unchanged
ENSG00000110852	CLEC2B	protein_coding	1.07988	0.15239	Unchanged	1.48026	0.014475	Up-regulated	1.40195	0.342493	Unchanged
ENSG00000110900	TSPAN11	protein_coding	1.63929	0.140387	Unchanged	1.99698	0.0263907	Up-regulated	1.28228	0.574066	Unchanged
ENSG00000111087	GLI1	protein_coding	2.60974	0.00563326	Up-regulated	2.82501	0.00114936	Up-regulated	2.51714	0.35848	Unchanged
ENSG00000111145	ELK3	protein_coding	1.18563	0.0113308	Up-regulated	1.34637	0.00293118	Up-regulated	1.25519	0.298713	Unchanged
ENSG00000112699	GMDS	protein_coding	1.02214	0.0385199	Up-regulated	0.726176	0.318485	Unchanged	0.534128	0.623481	Unchanged
ENSG00000113721	PDGFRB	protein_coding	1.1689	0.0748685	Unchanged	1.41246	0.0029808	Up-regulated	1.35091	0.341818	Unchanged
ENSG00000115165	CYTIP	protein_coding	1.11355	0.267984	Unchanged	1.5505	0.0399254	Up-regulated	0.627342	0.866597	Unchanged
ENSG00000115414	FN1	protein_coding	1.22364	0.0456815	Up-regulated	1.66791	0.00049889	Up-regulated	0.859561	0.483679	Unchanged
ENSG00000115507	OTX1	protein_coding	3.71368	0.0397248	Up-regulated	2.70293	0.456797	Unchanged	2.59956	0.467607	Unchanged
ENSG00000115604	IL18R1	protein_coding	1.60151	0.0488623	Up-regulated	1.83248	0.0463027	Up-regulated	1.30157	0.47692	Unchanged
ENSG00000115648	MLPH	protein_coding	1.38017	0.0463065	Up-regulated	0.9317	0.518969	Unchanged	-0.0123995	1	Unchanged
ENSG00000115884	SDC1	protein_coding	1.64668	0.23035	Unchanged	2.5967	0.00934163	Up-regulated	1.31278	0.77571	Unchanged
ENSG00000116329	OPRD1	protein_coding	-1.15969	0.00107656	Down-regulated	-0.526486	0.343823	Unchanged	-0.0150949	1	Unchanged
ENSG00000116690	PRG4	protein_coding	1.28907	0.000674639	Up-regulated	1.54706	0.0127754	Up-regulated	0.510822	0.777378	Unchanged
ENSG00000117122	MFAP2	protein_coding	1.70282	0.0997834	Unchanged	1.94877	0.0130557	Up-regulated	1.51671	0.341818	Unchanged
ENSG00000117560	FASLG	protein_coding	3.68426	0.0828431	Unchanged	4.43004	0.0162868	Up-regulated	3.93943	0.247467	Unchanged
ENSG00000117724	CENPF	protein_coding	0.825169	0.525319	Unchanged	1.90797	0.0154282	Up-regulated	1.77619	0.230324	Unchanged
ENSG00000118849	RARRES1	protein_coding	0.887286	0.312578	Unchanged	1.62845	0.0493644	Up-regulated	1.03686	0.469202	Unchanged
ENSG00000121068	TBX2	protein_coding	1.62636	0.033762	Up-regulated	1.55062	0.0378982	Up-regulated	0.997561	0.554284	Unchanged
ENSG00000122367	LDB3	protein_coding	1.68596	0.0495537	Up-regulated	1.45455	0.191157	Unchanged	1.95272	0.134602	Unchanged
ENSG00000122641	INHBA	protein_coding	1.06536	0.0193252	Up-regulated	1.22021	0.00934163	Up-regulated	0.396307	0.978396	Unchanged
ENSG00000122679	RAMP3	protein_coding	1.23835	0.0450966	Up-regulated	1.04701	0.17275	Unchanged	0.755618	0.631627	Unchanged
ENSG00000123243	ITIH5	protein_coding	1.02593	0.0190561	Up-regulated	1.00329	0.0257779	Up-regulated	0.907102	0.307045	Unchanged
ENSG00000123329	ARHGAP9	protein_coding	1.14435	0.309717	Unchanged	1.95093	0.0295505	Up-regulated	0.554237	1	Unchanged
ENSG00000123338	NCKAP1L	protein_coding	1.00037	0.346917	Unchanged	1.87012	0.0387002	Up-regulated	1.17073	0.483679	Unchanged
ENSG00000123836	PFKFB2	protein_coding	-1.17924	0.000231899	Down-regulated	-0.579308	0.359446	Unchanged	-0.100755	1	Unchanged
ENSG00000123838	C4BPA	protein_coding	1.50348	0.0709074	Unchanged	2.15919	0.014475	Up-regulated	0.731912	0.906996	Unchanged
ENSG00000123843	C4BPB	protein_coding	2.33	0.136122	Unchanged	3.29218	0.0391901	Up-regulated	1.94671	0.511368	Unchanged
ENSG00000124019	FAM124B	protein_coding	1.56309	0.402393	Unchanged	2.67124	0.0463027	Up-regulated	2.10654	0.341818	Unchanged
ENSG00000124067	SLC12A4	protein_coding	0.855306	0.069923	Unchanged	1.01005	0.0238253	Up-regulated	0.776257	0.38528	Unchanged
ENSG00000124107	SLPI	protein_coding	1.53861	0.0733684	Unchanged	1.87182	0.0494453	Up-regulated	0.850752	0.908729	Unchanged
ENSG00000124212	PTGIS	protein_coding	1.66961	0.14059	Unchanged	2.61305	0.0037061	Up-regulated	2.00948	0.348154	Unchanged
ENSG00000124225	PMEPA1	protein_coding	1.18827	0.0676887	Unchanged	1.63446	0.00280476	Up-regulated	0.66904	0.858245	Unchanged
ENSG00000124664	SPDEF	protein_coding	2.80729	0.34639	Unchanged	4.22249	0.0449477	Up-regulated	4.01385	0.307045	Unchanged
ENSG00000124766	SOX4	protein_coding	0.817645	0.122489	Unchanged	1.37891	0.000151665	Up-regulated	0.59827	0.469202	Unchanged
ENSG00000125730	C3	protein_coding	2.13464	0.0155883	Up-regulated	2.54217	0.00223132	Up-regulated	1.89945	0.344628	Unchanged
ENSG00000126787	DLGAP5	protein_coding	3.21103	0.166843	Unchanged	4.72601	0.0199817	Up-regulated	1.59959	0.866597	Unchanged
ENSG00000127249	ATP13A4	protein_coding	1.25545	0.0393865	Up-regulated	1.26024	0.0993835	Unchanged	0.917758	0.623481	Unchanged
ENSG00000127870	RNF6	protein_coding	-1.3287	3.79399e-09	Down-regulated	-0.622337	0.236741	Unchanged	-0.314285	0.825002	Unchanged
ENSG00000128683	GAD1	protein_coding	1.95426	0.00372691	Up-regulated	0.490555	0.950081	Unchanged	0.298819	1	Unchanged
ENSG00000129009	ISLR	protein_coding	1.22995	0.193287	Unchanged	1.66651	0.0249892	Up-regulated	1.39214	0.483679	Unchanged
ENSG00000129675	ARHGEF6	protein_coding	1.51675	0.019892	Up-regulated	1.62165	0.0087324	Up-regulated	1.50968	0.298713	Unchanged
ENSG00000130208	APOC1	protein_coding	1.73805	0.0704286	Unchanged	2.73128	0.00637905	Up-regulated	0.312195	1	Unchanged
ENSG00000130303	BST2	protein_coding	1.17466	0.069923	Unchanged	1.2963	0.0227745	Up-regulated	1.41892	0.323661	Unchanged
ENSG00000130508	PXDN	protein_coding	1.20821	0.0355336	Up-regulated	1.19977	0.065246	Unchanged	0.985974	0.366102	Unchanged
ENSG00000130561	SAG	protein_coding	-2.02213	0.0671104	Unchanged	-2.93854	0.00548373	Down-regulated	-1.98923	0.406678	Unchanged
ENSG00000130635	COL5A1	protein_coding	1.46419	0.0276838	Up-regulated	2.15457	0.000467577	Up-regulated	0.872748	0.766649	Unchanged
ENSG00000130643	CALY	protein_coding	1.25838	0.0147641	Up-regulated	0.506758	0.491249	Unchanged	0.315288	0.96338	Unchanged
ENSG00000131620	ANO1	protein_coding	0.294872	0.97372	Unchanged	1.62485	0.0308321	Up-regulated	1.18919	0.492109	Unchanged
ENSG00000131747	TOP2A	protein_coding	2.39018	0.0343101	Up-regulated	3.37941	0.00295177	Up-regulated	2.58046	0.323215	Unchanged
ENSG00000131981	LGALS3	protein_coding	1.33782	0.171419	Unchanged	1.66089	0.0293724	Up-regulated	1.09606	0.549468	Unchanged
ENSG00000132256	TRIM5	protein_coding	0.581621	0.547423	Unchanged	1.00577	0.0306405	Up-regulated	0.118129	1	Unchanged
ENSG00000132274	TRIM22	protein_coding	0.964376	0.250874	Unchanged	1.45101	0.0070944	Up-regulated	1.11407	0.469202	Unchanged
ENSG00000132465	JCHAIN	protein_coding	1.63306	0.329788	Unchanged	3.13731	0.0344638	Up-regulated	1.26041	0.900843	Unchanged
ENSG00000132470	ITGB4	protein_coding	1.20723	0.274193	Unchanged	1.69065	0.0233645	Up-regulated	0.72578	0.899737	Unchanged
ENSG00000132965	ALOX5AP	protein_coding	0.630612	0.135484	Unchanged	1.01482	0.00447068	Up-regulated	0.35744	0.733315	Unchanged
ENSG00000133321	PLAAT4	protein_coding	0.680396	0.209955	Unchanged	1.32006	0.00213162	Up-regulated	0.642571	0.578896	Unchanged
ENSG00000133392	MYH11	protein_coding	1.74941	0.0488541	Up-regulated	0.680481	0.460901	Unchanged	2.5854	0.00328434	Up-regulated
ENSG00000134028	ADAMDEC1	protein_coding	2.76284	0.114492	Unchanged	3.7627	0.0278231	Up-regulated	0.507285	1	Unchanged
ENSG00000134042	MRO	protein_coding	-1.12134	0.0309927	Down-regulated	-0.597562	0.374988	Unchanged	-0.300847	0.954693	Unchanged
ENSG00000134121	CHL1	protein_coding	-1.55377	6.74862e-05	Down-regulated	-0.573695	0.335037	Unchanged	-0.155591	1	Unchanged
ENSG00000134460	IL2RA	protein_coding	1.52346	0.569688	Unchanged	3.00995	0.0278231	Up-regulated	1.34218	0.833555	Unchanged
ENSG00000134516	DOCK2	protein_coding	1.62387	0.105922	Unchanged	2.14031	0.0111055	Up-regulated	1.52409	0.338646	Unchanged
ENSG00000134817	APLNR	protein_coding	2.46217	0.00306373	Up-regulated	2.54616	0.00298136	Up-regulated	2.85779	0.0135354	Up-regulated
ENSG00000134871	COL4A2	protein_coding	1.15526	0.0505077	Unchanged	1.44136	0.00295177	Up-regulated	1.02735	0.467607	Unchanged
ENSG00000134955	SLC37A2	protein_coding	1.64822	0.136798	Unchanged	2.0193	0.0173864	Up-regulated	1.37691	0.467607	Unchanged
ENSG00000135074	ADAM19	protein_coding	1.54715	0.0304859	Up-regulated	1.81688	0.00360107	Up-regulated	1.53208	0.231289	Unchanged
ENSG00000135116	HRK	protein_coding	-1.09939	0.278749	Unchanged	-1.22532	0.0497106	Down-regulated	-0.844404	0.538434	Unchanged
ENSG00000135144	DTX1	protein_coding	1.56484	0.0762858	Unchanged	1.58436	0.0338176	Up-regulated	1.1521	0.473079	Unchanged
ENSG00000135362	PRR5L	protein_coding	1.15973	0.264858	Unchanged	1.89514	0.0162952	Up-regulated	1.15855	0.510183	Unchanged
ENSG00000135472	FAIM2	protein_coding	1.96212	0.000291941	Up-regulated	0.320808	0.966171	Unchanged	-0.329656	1	Unchanged
ENSG00000135480	KRT7	protein_coding	1.78383	0.23606	Unchanged	2.72928	0.0319519	Up-regulated	0.782173	0.989589	Unchanged
ENSG00000135744	AGT	protein_coding	1.90828	0.0072839	Up-regulated	1.27972	0.0962104	Unchanged	0.19319	1	Unchanged
ENSG00000135914	HTR2B	protein_coding	1.12995	0.0383956	Up-regulated	1.30005	0.0375441	Up-regulated	1.19847	0.298713	Unchanged
ENSG00000136167	LCP1	protein_coding	1.33413	0.0633873	Unchanged	1.63836	0.00637905	Up-regulated	1.01505	0.467607	Unchanged
ENSG00000136295	TTYH3	protein_coding	0.952107	0.111991	Unchanged	1.26436	0.0173174	Up-regulated	0.421652	0.98155	Unchanged
ENSG00000136859	ANGPTL2	protein_coding	0.765038	0.0997834	Unchanged	1.11099	0.00213162	Up-regulated	0.921556	0.372392	Unchanged
ENSG00000136872	ALDOB	protein_coding	2.86448	4.22985e-07	Up-regulated	2.16041	0.0037061	Up-regulated	0.19866	1	Unchanged
ENSG00000137077	CCL21	protein_coding	4.02158	0.00673897	Up-regulated	3.92894	0.0213796	Up-regulated	3.16737	0.469202	Unchanged
ENSG00000137573	SULF1	protein_coding	1.21415	0.0383956	Up-regulated	0.93684	0.207801	Unchanged	0.201474	1	Unchanged
ENSG00000137673	MMP7	protein_coding	2.11315	0.159672	Unchanged	2.91992	0.0283769	Up-regulated	0.999319	1	Unchanged
ENSG00000137841	PLCB2	protein_coding	1.70573	0.0488541	Up-regulated	1.85766	0.0260213	Up-regulated	1.22584	0.578413	Unchanged
ENSG00000137948	BRDT	protein_coding	-2.36225	0.226211	Unchanged	-3.62414	0.0173296	Down-regulated	-2.90051	0.156853	Unchanged
ENSG00000138119	MYOF	protein_coding	1.33825	0.00742276	Up-regulated	1.43032	0.0152217	Up-regulated	0.756275	0.623481	Unchanged
ENSG00000138670	RASGEF1B	protein_coding	-1.04528	7.45565e-07	Down-regulated	-0.645232	0.122395	Unchanged	-0.422846	0.469202	Unchanged
ENSG00000138696	BMPR1B	protein_coding	2.01586	0.0709074	Unchanged	1.94624	0.0469223	Up-regulated	1.37849	0.483679	Unchanged
ENSG00000138778	CENPE	protein_coding	1.32871	0.094649	Unchanged	1.95966	0.0154282	Up-regulated	1.02314	0.670431	Unchanged
ENSG00000138964	PARVG	protein_coding	1.60419	0.0282509	Up-regulated	2.07667	0.00245242	Up-regulated	1.51551	0.338646	Unchanged
ENSG00000139354	GAS2L3	protein_coding	1.64809	0.170483	Unchanged	2.30403	0.0178752	Up-regulated	1.80797	0.298713	Unchanged
ENSG00000139626	ITGB7	protein_coding	3.19927	0.0457737	Up-regulated	2.46116	0.233111	Unchanged	2.50606	0.368266	Unchanged
ENSG00000140279	DUOX2	protein_coding	1.33173	0.337566	Unchanged	2.74076	0.0494453	Up-regulated	2.31601	0.469202	Unchanged
ENSG00000140287	HDC	protein_coding	2.22675	0.00831329	Up-regulated	1.9851	0.163409	Unchanged	1.80265	0.483679	Unchanged
ENSG00000140451	PIF1	protein_coding	2.75223	0.0704286	Unchanged	3.14178	0.0447444	Up-regulated	3.53258	0.210515	Unchanged
ENSG00000140678	ITGAX	protein_coding	1.67624	0.0347838	Up-regulated	2.15099	0.0131184	Up-regulated	1.33644	0.467607	Unchanged
ENSG00000140749	IGSF6	protein_coding	1.14856	0.166843	Unchanged	1.89748	0.00621005	Up-regulated	0.688899	0.858245	Unchanged
ENSG00000140807	NKD1	protein_coding	0.893355	0.186883	Unchanged	1.25809	0.0339689	Up-regulated	0.905404	0.469202	Unchanged
ENSG00000140931	CMTM3	protein_coding	1.17343	0.0309927	Up-regulated	1.32823	0.0132696	Up-regulated	1.09173	0.362849	Unchanged
ENSG00000140937	CDH11	protein_coding	1.54997	0.0645847	Unchanged	2.02585	0.00637905	Up-regulated	1.38073	0.359671	Unchanged
ENSG00000140968	IRF8	protein_coding	1.75391	0.00583156	Up-regulated	1.46669	0.0385387	Up-regulated	0.387984	1	Unchanged
ENSG00000141433	ADCYAP1	protein_coding	-1.01197	0.0010832	Down-regulated	-0.586766	0.1236	Unchanged	-0.313277	0.694322	Unchanged
ENSG00000141753	IGFBP4	protein_coding	1.47379	0.00831329	Up-regulated	1.585	0.00127901	Up-regulated	1.42094	0.323215	Unchanged
ENSG00000142089	IFITM3	protein_coding	0.975758	0.188715	Unchanged	1.30453	0.0460918	Up-regulated	1.15983	0.469202	Unchanged
ENSG00000142156	COL6A1	protein_coding	1.03778	0.000210095	Up-regulated	0.959871	0.000893243	Unchanged	0.658411	0.362849	Unchanged
ENSG00000142173	COL6A2	protein_coding	1.61944	0.00199049	Up-regulated	1.33193	0.0103352	Up-regulated	1.19775	0.44495	Unchanged
ENSG00000142512	SIGLEC10	protein_coding	1.55987	0.214734	Unchanged	2.60615	0.011567	Up-regulated	1.55349	0.483679	Unchanged
ENSG00000142552	RCN3	protein_coding	1.43487	0.0220939	Up-regulated	1.08107	0.12211	Unchanged	1.00628	0.467607	Unchanged
ENSG00000142748	FCN3	protein_coding	1.48748	0.1625	Unchanged	2.22937	0.0174945	Up-regulated	1.82455	0.366982	Unchanged
ENSG00000143013	LMO4	protein_coding	1.10333	0.0456815	Up-regulated	0.997101	0.0774313	Unchanged	0.447653	0.932073	Unchanged
ENSG00000143110	C1orf162	protein_coding	0.98054	0.050003	Unchanged	1.08293	0.0474934	Up-regulated	0.694258	0.483679	Unchanged
ENSG00000143119	CD53	protein_coding	1.78435	0.0343379	Up-regulated	2.26935	0.00299981	Up-regulated	1.20898	0.483679	Unchanged
ENSG00000143954	REG3G	protein_coding	3.28034	0.0241077	Up-regulated	4.03477	0.00295177	Up-regulated	0.857049	0.978396	Unchanged
ENSG00000144057	ST6GAL2	protein_coding	2.23988	0.0448174	Up-regulated	2.47522	0.0278965	Up-regulated	2.76877	0.112718	Unchanged
ENSG00000144407	PTH2R	protein_coding	-1.20065	0.0360174	Down-regulated	-0.490623	0.766976	Unchanged	-0.106859	1	Unchanged
ENSG00000144485	HES6	protein_coding	1.50613	0.0292889	Up-regulated	1.27069	0.036773	Up-regulated	0.203737	1	Unchanged
ENSG00000144810	COL8A1	protein_coding	1.53741	0.0501999	Unchanged	1.62098	0.0319988	Up-regulated	0.990226	0.694835	Unchanged
ENSG00000144837	PLA1A	protein_coding	-1.13648	0.0289385	Down-regulated	-0.235064	0.916062	Unchanged	0.0982851	1	Unchanged
ENSG00000145888	GLRA1	protein_coding	-1.28983	0.00831329	Down-regulated	-0.943192	0.0147092	Unchanged	-0.216588	1	Unchanged
ENSG00000146112	PPP1R18	protein_coding	1.07246	0.15526	Unchanged	1.35506	0.0138247	Up-regulated	0.992088	0.483679	Unchanged
ENSG00000146242	TPBG	protein_coding	0.751784	0.556346	Unchanged	1.3753	0.0288717	Up-regulated	0.569281	0.901584	Unchanged
ENSG00000146674	IGFBP3	protein_coding	1.32204	0.0560264	Unchanged	1.68135	0.00630689	Up-regulated	0.784158	0.587401	Unchanged
ENSG00000147003	CLTRN	protein_coding	-1.42637	4.41233e-09	Down-regulated	-0.593932	0.366604	Unchanged	-0.084933	1	Unchanged
ENSG00000147168	IL2RG	protein_coding	1.61789	0.0939226	Unchanged	2.26563	0.0497106	Up-regulated	0.928938	0.757233	Unchanged
ENSG00000148053	NTRK2	protein_coding	1.19233	0.0392455	Up-regulated	1.11185	0.192672	Unchanged	0.149735	1	Unchanged
ENSG00000148773	MKI67	protein_coding	2.93648	0.0176104	Up-regulated	4.96478	3.52889e-06	Up-regulated	4.12238	0.00914069	Up-regulated
ENSG00000149131	SERPING1	protein_coding	1.51282	0.0574623	Unchanged	1.96565	0.00298136	Up-regulated	1.27959	0.469202	Unchanged
ENSG00000149257	SERPINH1	protein_coding	1.02963	0.0306205	Up-regulated	1.28444	0.00245242	Up-regulated	0.781362	0.480757	Unchanged
ENSG00000149451	ADAM33	protein_coding	1.92668	0.00673897	Up-regulated	1.38778	0.116492	Unchanged	1.42032	0.467607	Unchanged
ENSG00000150782	IL18	protein_coding	1.69112	0.0391557	Up-regulated	1.96095	0.0119984	Up-regulated	0.656851	0.901872	Unchanged
ENSG00000151474	FRMD4A	protein_coding	1.08341	0.00608263	Up-regulated	0.927951	0.0494453	Unchanged	0.612581	0.469202	Unchanged
ENSG00000151617	EDNRA	protein_coding	1.01663	0.425951	Unchanged	1.8316	0.0111055	Up-regulated	1.07991	0.732621	Unchanged
ENSG00000151790	TDO2	protein_coding	1.42301	0.303569	Unchanged	2.77634	0.00608028	Up-regulated	1.0637	0.989414	Unchanged
ENSG00000151834	GABRA2	protein_coding	-3.43968	0.00106938	Down-regulated	-0.713502	0.791967	Unchanged	0.248452	1	Unchanged
ENSG00000152049	KCNE4	protein_coding	1.0918	0.0306409	Up-regulated	0.935683	0.162175	Unchanged	0.973342	0.467607	Unchanged
ENSG00000152254	G6PC2	protein_coding	-1.00741	0.00538064	Down-regulated	-0.734649	0.142436	Unchanged	-0.309819	0.858245	Unchanged
ENSG00000153179	RASSF3	protein_coding	0.870779	0.231378	Unchanged	1.22011	0.0239916	Up-regulated	0.614764	0.844722	Unchanged
ENSG00000154096	THY1	protein_coding	0.844284	0.32125	Unchanged	1.21719	0.0213796	Up-regulated	1.04294	0.570279	Unchanged
ENSG00000154269	ENPP3	protein_coding	1.93761	0.0456815	Up-regulated	1.23722	0.682172	Unchanged	1.63775	0.467607	Unchanged
ENSG00000154589	LY96	protein_coding	1.2884	0.0948011	Unchanged	1.71849	0.0406667	Up-regulated	1.11957	0.590524	Unchanged
ENSG00000154721	JAM2	protein_coding	0.797304	0.196311	Unchanged	1.34763	0.00668094	Up-regulated	1.0432	0.373632	Unchanged
ENSG00000154760	SLFN13	protein_coding	1.4243	0.137835	Unchanged	2.00369	0.0186563	Up-regulated	1.58455	0.35848	Unchanged
ENSG00000154856	APCDD1	protein_coding	1.75606	0.0182251	Up-regulated	2.21748	0.00116072	Up-regulated	1.36843	0.476253	Unchanged
ENSG00000155307	SAMSN1	protein_coding	1.29311	0.0936747	Unchanged	1.63371	0.0410409	Up-regulated	1.21463	0.368266	Unchanged
ENSG00000155366	RHOC	protein_coding	0.875644	0.0392455	Unchanged	1.22196	0.000448024	Up-regulated	0.845304	0.358504	Unchanged
ENSG00000155465	SLC7A7	protein_coding	1.33156	0.00956241	Up-regulated	1.38606	0.00742946	Up-regulated	0.673367	0.483679	Unchanged
ENSG00000155659	VSIG4	protein_coding	1.62874	0.0685997	Unchanged	1.75569	0.0429664	Up-regulated	1.07713	0.66644	Unchanged
ENSG00000156466	GDF6	protein_coding	2.51188	0.0340302	Up-regulated	1.29397	0.507764	Unchanged	0.996878	0.858245	Unchanged
ENSG00000156687	UNC5D	protein_coding	-1.31294	0.00306373	Down-regulated	-0.713926	0.18393	Unchanged	-0.300015	0.990512	Unchanged
ENSG00000156738	MS4A1	protein_coding	3.96998	0.0394341	Up-regulated	4.0235	0.224429	Unchanged	1.98792	0.566632	Unchanged
ENSG00000157227	MMP14	protein_coding	1.31287	0.16361	Unchanged	1.85033	0.0130557	Up-regulated	1.32736	0.467607	Unchanged
ENSG00000157456	CCNB2	protein_coding	1.6656	0.165286	Unchanged	2.24062	0.0111055	Up-regulated	1.41634	0.467607	Unchanged
ENSG00000157570	TSPAN18	protein_coding	1.53096	0.110688	Unchanged	1.85424	0.00431082	Up-regulated	1.76221	0.342493	Unchanged
ENSG00000158473	CD1D	protein_coding	1.47829	0.165801	Unchanged	1.94732	0.0432545	Up-regulated	1.60965	0.275222	Unchanged
ENSG00000158869	FCER1G	protein_coding	1.40313	0.0456815	Up-regulated	2.03871	0.00151161	Up-regulated	1.04789	0.492109	Unchanged
ENSG00000159189	C1QC	protein_coding	1.28599	0.0843571	Unchanged	2.05117	0.000589987	Up-regulated	0.889613	0.657966	Unchanged
ENSG00000159216	RUNX1	protein_coding	1.34465	0.159542	Unchanged	1.66688	0.0319519	Up-regulated	1.19962	0.483679	Unchanged
ENSG00000159403	C1R	protein_coding	1.82544	0.00454122	Up-regulated	1.96995	0.00088284	Up-regulated	1.74856	0.287473	Unchanged
ENSG00000160181	TFF2	protein_coding	3.80361	0.019892	Up-regulated	1.62146	0.943228	Unchanged	5.43778	0.331924	Unchanged
ENSG00000160255	ITGB2	protein_coding	2.09996	0.0124236	Up-regulated	2.39713	0.00104554	Up-regulated	1.33378	0.469202	Unchanged
ENSG00000160593	JAML	protein_coding	1.55583	0.0735144	Unchanged	1.8424	0.0213796	Up-regulated	1.24681	0.578741	Unchanged
ENSG00000161381	PLXDC1	protein_coding	1.37668	0.0335506	Up-regulated	1.80777	0.00377624	Up-regulated	1.77155	0.175832	Unchanged
ENSG00000161638	ITGA5	protein_coding	0.528727	0.717935	Unchanged	1.17979	0.0134637	Up-regulated	1.03855	0.469202	Unchanged
ENSG00000161798	AQP5	protein_coding	3.56257	0.0343379	Up-regulated	2.78185	0.0775715	Unchanged	2.71619	0.690079	Unchanged
ENSG00000162444	RBP7	protein_coding	1.21534	0.0199036	Up-regulated	1.50473	0.0117063	Up-regulated	1.23193	0.469202	Unchanged
ENSG00000162511	LAPTM5	protein_coding	1.97348	0.0041505	Up-regulated	2.4505	0.000242996	Up-regulated	1.35	0.436187	Unchanged
ENSG00000162576	MXRA8	protein_coding	1.67107	0.0119541	Up-regulated	1.76172	0.00293336	Up-regulated	1.29551	0.467607	Unchanged
ENSG00000162591	MEGF6	protein_coding	1.05973	0.270278	Unchanged	1.60393	0.0365896	Up-regulated	0.992384	0.518366	Unchanged
ENSG00000162645	GBP2	protein_coding	1.32873	0.0817052	Unchanged	1.48679	0.0105797	Up-regulated	1.44557	0.307045	Unchanged
ENSG00000162896	PIGR	protein_coding	2.01229	0.129486	Unchanged	2.89153	0.0194431	Up-regulated	2.16584	0.470552	Unchanged
ENSG00000162949	CAPN13	protein_coding	-1.08085	0.00106938	Down-regulated	-0.761435	0.0963725	Unchanged	-0.125267	1	Unchanged
ENSG00000163131	CTSS	protein_coding	1.10937	0.157849	Unchanged	1.72406	0.0202572	Up-regulated	0.699826	0.828634	Unchanged
ENSG00000163359	COL6A3	protein_coding	1.21585	0.0739956	Unchanged	1.71873	0.0037207	Up-regulated	1.00002	0.484228	Unchanged
ENSG00000163364	LINC01116	lncRNA	1.74314	0.0195924	Up-regulated	0.30594	1	Unchanged	0.271883	1	Unchanged
ENSG00000163377	TAFA4	protein_coding	-1.76566	0.0326795	Down-regulated	-1.57574	0.0137317	Down-regulated	-0.834994	0.480757	Unchanged
ENSG00000163406	SLC15A2	protein_coding	0.434507	0.694295	Unchanged	1.16417	0.0450251	Up-regulated	0.376404	0.969811	Unchanged
ENSG00000163430	FSTL1	protein_coding	0.945563	0.081435	Unchanged	1.08145	0.0234482	Up-regulated	0.952658	0.469202	Unchanged
ENSG00000163534	FCRL1	protein_coding	3.33528	0.0809485	Unchanged	5.39419	0.0220371	Up-regulated	3.37554	0.574066	Unchanged
ENSG00000163563	MNDA	protein_coding	1.41294	0.072357	Unchanged	1.72045	0.032189	Up-regulated	1.31978	0.469202	Unchanged
ENSG00000163568	AIM2	protein_coding	3.14032	0.0182251	Up-regulated	2.78898	0.239092	Unchanged	1.84129	0.652849	Unchanged
ENSG00000163581	SLC2A2	protein_coding	-1.7915	5.27667e-08	Down-regulated	-0.638949	0.273657	Unchanged	-0.12541	1	Unchanged
ENSG00000163710	PCOLCE2	protein_coding	4.32613	8.66658e-08	Up-regulated	2.40437	0.0548293	Unchanged	0.226859	1	Unchanged
ENSG00000163751	CPA3	protein_coding	1.28684	0.0682272	Unchanged	1.58348	0.0344184	Up-regulated	0.835775	0.762943	Unchanged
ENSG00000163803	PLB1	protein_coding	1.17109	0.0065685	Up-regulated	0.535106	0.596534	Unchanged	0.109142	1	Unchanged
ENSG00000164107	HAND2	protein_coding	1.40927	0.0232678	Up-regulated	1.11891	0.0795709	Unchanged	1.10097	0.38528	Unchanged
ENSG00000164294	GPX8	protein_coding	1.34186	0.13864	Unchanged	1.66788	0.00691949	Up-regulated	1.06816	0.651592	Unchanged
ENSG00000164342	TLR3	protein_coding	1.11128	0.155592	Unchanged	1.42953	0.0213796	Up-regulated	0.570418	0.931954	Unchanged
ENSG00000164530	PI16	protein_coding	1.57538	0.113218	Unchanged	0.638564	0.905562	Unchanged	3.48811	0.0135354	Up-regulated
ENSG00000164626	KCNK5	protein_coding	1.81568	0.0654831	Unchanged	2.27578	0.00270732	Up-regulated	1.47971	0.469202	Unchanged
ENSG00000164692	COL1A2	protein_coding	1.2923	0.0997834	Unchanged	1.8763	0.00714669	Up-regulated	1.11905	0.576272	Unchanged
ENSG00000164694	FNDC1	protein_coding	1.24994	0.328151	Unchanged	2.12263	0.0443358	Up-regulated	1.56603	0.467607	Unchanged
ENSG00000164761	TNFRSF11B	protein_coding	1.09649	0.180183	Unchanged	1.76885	0.0308321	Up-regulated	0.550086	0.973897	Unchanged
ENSG00000165168	CYBB	protein_coding	1.61626	0.0435592	Up-regulated	2.14453	0.000893243	Up-regulated	1.22677	0.469202	Unchanged
ENSG00000165195	PIGA	protein_coding	-1.32561	5.84031e-08	Down-regulated	-0.518646	0.449615	Unchanged	-0.260614	0.978396	Unchanged
ENSG00000165376	CLDN2	protein_coding	2.12889	0.207363	Unchanged	3.27167	0.00859019	Up-regulated	2.01286	0.529147	Unchanged
ENSG00000165409	TSHR	protein_coding	1.44994	0.0257558	Up-regulated	0.312348	0.998465	Unchanged	-0.207199	1	Unchanged
ENSG00000165633	VSTM4	protein_coding	1.08298	0.100594	Unchanged	1.30798	0.0220371	Up-regulated	1.00558	0.473725	Unchanged
ENSG00000165646	SLC18A2	protein_coding	1.06299	0.0216913	Up-regulated	0.498705	0.624931	Unchanged	0.077035	1	Unchanged
ENSG00000166033	HTRA1	protein_coding	1.03624	0.0187426	Up-regulated	1.1797	0.00245242	Up-regulated	0.731383	0.608181	Unchanged
ENSG00000166278	C2	protein_coding	0.896	0.15239	Unchanged	1.65276	0.00162145	Up-regulated	1.30063	0.232603	Unchanged
ENSG00000166482	MFAP4	protein_coding	1.37873	0.0434898	Up-regulated	1.191	0.188125	Unchanged	1.68216	0.35848	Unchanged
ENSG00000166676	TVP23A	protein_coding	1.47425	0.032144	Up-regulated	0.73657	0.714799	Unchanged	1.16251	0.43304	Unchanged
ENSG00000166927	MS4A7	protein_coding	0.959204	0.353204	Unchanged	1.5364	0.0408772	Up-regulated	0.913207	0.777267	Unchanged
ENSG00000167034	NKX3-1	protein_coding	-1.25529	0.0151181	Down-regulated	-0.684868	0.263043	Unchanged	-0.813879	0.298713	Unchanged
ENSG00000167286	CD3D	protein_coding	1.56771	0.130458	Unchanged	2.23518	0.0316624	Up-regulated	0.971136	0.858245	Unchanged
ENSG00000167601	AXL	protein_coding	0.673644	0.412377	Unchanged	1.20416	0.026426	Up-regulated	0.96099	0.598738	Unchanged
ENSG00000167613	LAIR1	protein_coding	1.35527	0.109301	Unchanged	1.73967	0.0482444	Up-regulated	1.0092	0.589718	Unchanged
ENSG00000167851	CD300A	protein_coding	1.39121	0.22951	Unchanged	2.186	0.026426	Up-regulated	1.33832	0.483679	Unchanged
ENSG00000168386	FILIP1L	protein_coding	0.851505	0.214134	Unchanged	1.18456	0.0228821	Up-regulated	0.858206	0.48797	Unchanged
ENSG00000168405	CMAHP	transcribed_unitary_pseudogene	1.20532	0.0667174	Unchanged	1.27955	0.0177202	Up-regulated	1.12351	0.35848	Unchanged
ENSG00000168528	SERINC2	protein_coding	1.33136	0.136828	Unchanged	1.57402	0.0494453	Up-regulated	0.9847	0.682229	Unchanged
ENSG00000168542	COL3A1	protein_coding	1.42114	0.0609257	Unchanged	2.19988	0.00172049	Up-regulated	0.964162	0.792318	Unchanged
ENSG00000168679	SLC16A4	protein_coding	1.22288	0.00831329	Up-regulated	0.934393	0.143	Unchanged	0.899977	0.377096	Unchanged
ENSG00000168685	IL7R	protein_coding	2.80824	0.0113846	Up-regulated	2.4544	0.190661	Unchanged	2.28314	0.26308	Unchanged
ENSG00000168918	INPP5D	protein_coding	1.06093	0.0124236	Up-regulated	0.907981	0.045599	Unchanged	0.651146	0.483679	Unchanged
ENSG00000168961	LGALS9	protein_coding	1.61381	0.0621576	Unchanged	1.88921	0.00985587	Up-regulated	1.31866	0.342493	Unchanged
ENSG00000169403	PTAFR	protein_coding	1.57568	0.0263597	Up-regulated	2.10093	0.00137313	Up-regulated	1.44649	0.469202	Unchanged
ENSG00000169442	CD52	protein_coding	2.0303	0.00831329	Up-regulated	2.23516	0.00516999	Up-regulated	1.06842	0.623481	Unchanged
ENSG00000169508	GPR183	protein_coding	0.627314	0.415354	Unchanged	1.1086	0.0496071	Up-regulated	0.620564	0.623973	Unchanged
ENSG00000169554	ZEB2	protein_coding	1.14138	0.0461551	Up-regulated	1.18328	0.0268298	Up-regulated	1.13701	0.298713	Unchanged
ENSG00000170044	ZPLD1	protein_coding	-1.29601	0.0187426	Down-regulated	-0.558873	0.706969	Unchanged	-0.199852	1	Unchanged
ENSG00000170476	MZB1	protein_coding	2.57571	0.164254	Unchanged	4.47181	0.00486806	Up-regulated	0.95458	1	Unchanged
ENSG00000170509	HSD17B13	protein_coding	1.93918	3.91291e-07	Up-regulated	1.49492	0.00637905	Up-regulated	0.560003	0.858245	Unchanged
ENSG00000170891	CYTL1	protein_coding	2.91556	0.0257558	Up-regulated	1.16136	0.798569	Unchanged	2.32587	0.35848	Unchanged
ENSG00000171004	HS6ST2	protein_coding	-1.0261	0.0480517	Down-regulated	-0.641052	0.406442	Unchanged	-0.0510233	1	Unchanged
ENSG00000171227	TMEM37	protein_coding	-1.14082	3.83059e-06	Down-regulated	-0.513601	0.337708	Unchanged	0.128427	1	Unchanged
ENSG00000171617	ENC1	protein_coding	1.12495	0.213134	Unchanged	1.84589	0.000467577	Up-regulated	0.721525	0.855147	Unchanged
ENSG00000171812	COL8A2	protein_coding	1.74765	0.0315785	Up-regulated	1.57011	0.0537457	Unchanged	1.05681	0.641742	Unchanged
ENSG00000172016	REG3A	protein_coding	4.13541	0.00150683	Up-regulated	5.21054	5.28992e-05	Up-regulated	1.05135	0.928144	Unchanged
ENSG00000172037	LAMB2	protein_coding	1.18175	0.0162808	Up-regulated	1.27391	0.00299981	Up-regulated	1.00628	0.368266	Unchanged
ENSG00000172236	TPSAB1	protein_coding	1.88752	0.00268862	Up-regulated	1.91325	0.0220456	Up-regulated	1.85127	0.167923	Unchanged
ENSG00000172349	IL16	protein_coding	1.4534	0.0739956	Unchanged	1.69498	0.013287	Up-regulated	1.25851	0.467607	Unchanged
ENSG00000172575	RASGRP1	protein_coding	-1.09735	1.76188e-05	Down-regulated	-0.663071	0.0359766	Unchanged	-0.0979539	1	Unchanged
ENSG00000172724	CCL19	protein_coding	3.51021	0.0119272	Up-regulated	4.00427	0.0285699	Up-regulated	1.29229	0.818844	Unchanged
ENSG00000172819	RARG	protein_coding	1.35871	0.0561827	Unchanged	1.40616	0.00486733	Up-regulated	1.00244	0.541147	Unchanged
ENSG00000173369	C1QB	protein_coding	1.4187	0.070366	Unchanged	2.16969	0.000893243	Up-regulated	0.89882	0.770732	Unchanged
ENSG00000173372	C1QA	protein_coding	1.65819	0.0309427	Up-regulated	2.2854	0.000209363	Up-regulated	1.40183	0.467607	Unchanged
ENSG00000173391	OLR1	protein_coding	1.67745	0.317098	Unchanged	2.87045	0.0339689	Up-regulated	0.410197	1	Unchanged
ENSG00000173702	MUC13	protein_coding	0.881831	0.327589	Unchanged	1.74912	0.0111055	Up-regulated	0.273349	1	Unchanged
ENSG00000174326	SLC16A11	protein_coding	1.32112	0.0282509	Up-regulated	0.579867	0.706969	Unchanged	0.70501	0.574066	Unchanged
ENSG00000174448	STARD6	protein_coding	-1.98724	0.0277943	Down-regulated	-0.368739	1	Unchanged	-0.79455	0.76714	Unchanged
ENSG00000174807	CD248	protein_coding	1.12772	0.208505	Unchanged	1.28929	0.0463301	Up-regulated	1.16049	0.537772	Unchanged
ENSG00000175130	MARCKSL1	protein_coding	0.960431	0.061017	Unchanged	1.15491	0.0203012	Up-regulated	0.671897	0.657966	Unchanged
ENSG00000175183	CSRP2	protein_coding	1.18182	0.136393	Unchanged	1.76693	0.00299981	Up-regulated	1.38281	0.35848	Unchanged
ENSG00000175785	PRIMA1	protein_coding	3.56544	8.21445e-06	Up-regulated	2.41288	0.102401	Unchanged	2.19078	0.406678	Unchanged
ENSG00000176788	BASP1	protein_coding	1.4522	0.0171485	Up-regulated	1.62631	0.0173296	Up-regulated	0.833796	0.618575	Unchanged
ENSG00000176845	METRNL	protein_coding	1.17993	0.323562	Unchanged	1.81267	0.0461767	Up-regulated	1.32408	0.589718	Unchanged
ENSG00000177337	DLGAP1-AS1	lncRNA	1.31467	0.0174857	Up-regulated	1.28218	0.0257779	Up-regulated	0.272658	1	Unchanged
ENSG00000177374	HIC1	protein_coding	1.33427	0.0515964	Unchanged	1.44702	0.00270732	Up-regulated	0.98769	0.469202	Unchanged
ENSG00000177551	NHLH2	protein_coding	1.67901	0.010482	Up-regulated	-0.0222093	1	Unchanged	0.0313377	1	Unchanged
ENSG00000177602	HASPIN	protein_coding	1.39855	0.423514	Unchanged	3.98234	0.0494453	Up-regulated	2.10663	0.762867	Unchanged
ENSG00000177675	CD163L1	protein_coding	2.31943	0.0167709	Up-regulated	2.05453	0.0494453	Up-regulated	1.9657	0.298713	Unchanged
ENSG00000177989	ODF3B	protein_coding	1.81026	0.026973	Up-regulated	0.998008	0.660664	Unchanged	0.349035	1	Unchanged
ENSG00000179344	HLA-DQB1	protein_coding	0.943569	0.245844	Unchanged	1.6117	0.0152217	Up-regulated	1.15954	0.467607	Unchanged
ENSG00000179796	LRRC3B	protein_coding	-3.09491	0.0182218	Down-regulated	-1.9382	0.32488	Unchanged	-1.87955	0.381886	Unchanged
ENSG00000180353	HCLS1	protein_coding	1.08083	0.0751999	Unchanged	1.39644	0.0103352	Up-regulated	0.890243	0.484228	Unchanged
ENSG00000180644	PRF1	protein_coding	1.78889	0.0397708	Up-regulated	1.6394	0.201926	Unchanged	1.76692	0.331924	Unchanged
ENSG00000181234	TMEM132C	protein_coding	1.64359	0.00107656	Up-regulated	0.613686	0.719455	Unchanged	0.335687	1	Unchanged
ENSG00000181847	TIGIT	protein_coding	2.40732	0.0127664	Up-regulated	3.06962	0.0150413	Up-regulated	1.20351	0.733574	Unchanged
ENSG00000182240	BACE2	protein_coding	0.910119	0.210168	Unchanged	1.23651	0.0220371	Up-regulated	0.504819	0.909396	Unchanged
ENSG00000182326	C1S	protein_coding	1.49667	0.0371775	Up-regulated	1.71696	0.00486806	Up-regulated	1.63376	0.331924	Unchanged
ENSG00000182492	BGN	protein_coding	1.23106	0.0907426	Unchanged	1.41592	0.026426	Up-regulated	1.02433	0.508717	Unchanged
ENSG00000182511	FES	protein_coding	1.80068	0.00514356	Up-regulated	1.70321	0.000893243	Up-regulated	1.48254	0.156853	Unchanged
ENSG00000182578	CSF1R	protein_coding	1.09794	0.136463	Unchanged	1.59485	0.0119984	Up-regulated	1.08196	0.469202	Unchanged
ENSG00000182704	TSKU	protein_coding	1.14044	0.0413438	Up-regulated	1.13621	0.0562258	Unchanged	1.00088	0.439278	Unchanged
ENSG00000184371	CSF1	protein_coding	1.09206	0.100594	Unchanged	1.34989	0.022079	Up-regulated	1.2516	0.342493	Unchanged
ENSG00000184489	PTP4A3	protein_coding	1.20115	0.0411153	Up-regulated	1.44979	0.0401724	Up-regulated	0.682922	0.746272	Unchanged
ENSG00000184500	PROS1	protein_coding	0.932118	0.0673653	Unchanged	1.1387	0.0450251	Up-regulated	0.800635	0.469202	Unchanged
ENSG00000185101	ANO9	protein_coding	1.1082	0.0306205	Up-regulated	0.785294	0.318485	Unchanged	0.0887811	1	Unchanged
ENSG00000185201	IFITM2	protein_coding	1.13146	0.122489	Unchanged	1.39365	0.026426	Up-regulated	1.19331	0.469202	Unchanged
ENSG00000185269	NOTUM	protein_coding	1.80299	0.0106279	Up-regulated	1.33328	0.143106	Unchanged	0.812062	0.924604	Unchanged
ENSG00000185291	IL3RA	protein_coding	0.913888	0.0681466	Unchanged	1.17429	0.0157242	Up-regulated	1.05541	0.26308	Unchanged
ENSG00000185811	IKZF1	protein_coding	1.71766	0.0609257	Unchanged	2.17965	0.00805083	Up-regulated	1.02003	0.779511	Unchanged
ENSG00000185862	EVI2B	protein_coding	1.1472	0.214391	Unchanged	1.73348	0.0158791	Up-regulated	0.794183	0.818945	Unchanged
ENSG00000185985	SLITRK2	protein_coding	3.04618	0.0180544	Up-regulated	1.49741	0.661389	Unchanged	0.819565	0.992971	Unchanged
ENSG00000186732	MPPED1	protein_coding	-2.45643	0.186883	Unchanged	-4.20774	0.0396702	Down-regulated	-2.39755	0.652967	Unchanged
ENSG00000186818	LILRB4	protein_coding	1.43224	0.258864	Unchanged	2.60305	0.0141387	Up-regulated	1.61093	0.469202	Unchanged
ENSG00000187498	COL4A1	protein_coding	0.843197	0.27303	Unchanged	1.4416	0.0173296	Up-regulated	1.0515	0.483679	Unchanged
ENSG00000187513	GJA4	protein_coding	0.941281	0.341192	Unchanged	1.61755	0.0449189	Up-regulated	1.28294	0.483679	Unchanged
ENSG00000187955	COL14A1	protein_coding	1.38578	0.0220939	Up-regulated	1.536	0.00723754	Up-regulated	1.27229	0.424925	Unchanged
ENSG00000188153	COL4A5	protein_coding	2.03978	0.00758854	Up-regulated	1.91646	0.0235497	Up-regulated	1.74066	0.232603	Unchanged
ENSG00000189171	S100A13	protein_coding	0.764284	0.109042	Unchanged	1.00167	0.0194431	Up-regulated	0.722232	0.469202	Unchanged
ENSG00000196126	HLA-DRB1	protein_coding	1.29612	0.0456815	Up-regulated	1.77729	0.000893243	Up-regulated	1.12754	0.468535	Unchanged
ENSG00000196154	S100A4	protein_coding	1.70124	0.0113846	Up-regulated	1.75619	0.0119984	Up-regulated	1.98947	0.195762	Unchanged
ENSG00000196188	CTSE	protein_coding	1.58311	0.0480517	Up-regulated	1.9976	0.318485	Unchanged	0.856381	0.932073	Unchanged
ENSG00000196260	SFTA2	protein_coding	1.46691	0.273917	Unchanged	2.59697	0.0172343	Up-regulated	1.40151	0.733574	Unchanged
ENSG00000196411	EPHB4	protein_coding	1.12454	0.230367	Unchanged	1.4411	0.0164765	Up-regulated	1.02791	0.467607	Unchanged
ENSG00000196569	LAMA2	protein_coding	1.03428	0.0504765	Unchanged	1.13685	0.0471551	Up-regulated	0.958473	0.469202	Unchanged
ENSG00000196664	TLR7	protein_coding	2.20971	0.0722631	Unchanged	2.70935	0.014475	Up-regulated	2.17038	0.210402	Unchanged
ENSG00000196735	HLA-DQA1	protein_coding	1.00786	0.285675	Unchanged	1.62783	0.0215175	Up-regulated	0.964539	0.608813	Unchanged
ENSG00000197253	TPSB2	protein_coding	1.77174	0.0288223	Up-regulated	0.950027	0.650903	Unchanged	0.608981	1	Unchanged
ENSG00000197256	KANK2	protein_coding	1.09807	0.010482	Up-regulated	0.999468	0.00957842	Unchanged	0.98596	0.298713	Unchanged
ENSG00000197629	MPEG1	protein_coding	1.26513	0.261799	Unchanged	1.70729	0.0320597	Up-regulated	1.26046	0.51955	Unchanged
ENSG00000197991	ENSG00000197991	protein_coding	0.181123	1	Unchanged	2.57532	0.0372711	Up-regulated	-0.124378	1	Unchanged
ENSG00000198053	SIRPA	protein_coding	1.07147	0.0480517	Up-regulated	1.16495	0.0213796	Up-regulated	0.619493	0.623481	Unchanged
ENSG00000198353	HOXC4	protein_coding	1.45424	0.645978	Unchanged	2.60558	0.0280451	Up-regulated	2.43206	0.469202	Unchanged
ENSG00000198467	TPM2	protein_coding	1.06319	0.0480517	Up-regulated	0.757633	0.12305	Unchanged	0.737226	0.467607	Unchanged
ENSG00000198502	HLA-DRB5	protein_coding	1.55401	0.0862124	Unchanged	2.24511	0.00299981	Up-regulated	1.46698	0.469202	Unchanged
ENSG00000198739	LRRTM3	protein_coding	-1.1973	0.00106938	Down-regulated	-0.774867	0.236345	Unchanged	-0.213339	1	Unchanged
ENSG00000198744	MTCO3P12	unprocessed_pseudogene	-1.45219	0.0474889	Down-regulated	-0.561687	0.943057	Unchanged	-0.924442	0.62756	Unchanged
ENSG00000198795	ZNF521	protein_coding	1.38854	0.0543444	Unchanged	1.5803	0.0370369	Up-regulated	1.78054	0.230324	Unchanged
ENSG00000198851	CD3E	protein_coding	1.88386	0.0480517	Up-regulated	2.02352	0.216494	Unchanged	1.73182	0.374852	Unchanged
ENSG00000198959	TGM2	protein_coding	1.72274	0.0263416	Up-regulated	2.2558	0.000448024	Up-regulated	1.2969	0.469202	Unchanged
ENSG00000202222	Y_RNA	misc_RNA	2.164	0.0397708	Up-regulated	1.80217	0.162688	Unchanged	1.17446	0.726098	Unchanged
ENSG00000203527	SCUBE1-AS1	lncRNA	-1.84291	0.643602	Unchanged	-3.64723	0.0233645	Down-regulated	-1.75823	0.985724	Unchanged
ENSG00000203747	FCGR3A	protein_coding	1.24297	0.141976	Unchanged	1.76586	0.00216793	Up-regulated	0.694656	0.866597	Unchanged
ENSG00000203799	CCDC162P	transcribed_unitary_pseudogene	1.58866	0.0125981	Up-regulated	1.53206	0.0441799	Up-regulated	0.586089	0.901577	Unchanged
ENSG00000203837	PNLIPRP3	protein_coding	-5.93845	0.0227374	Down-regulated	-6.02084	0.302356	Unchanged	-6.23792	0.467607	Unchanged
ENSG00000204252	HLA-DOA	protein_coding	1.40821	0.140057	Unchanged	2.17541	0.00710555	Up-regulated	1.47497	0.469202	Unchanged
ENSG00000204257	HLA-DMA	protein_coding	1.08912	0.112778	Unchanged	1.64027	0.00130335	Up-regulated	0.913921	0.467607	Unchanged
ENSG00000204262	COL5A2	protein_coding	1.03937	0.00466077	Up-regulated	1.25712	0.000467577	Up-regulated	0.826054	0.362849	Unchanged
ENSG00000204287	HLA-DRA	protein_coding	1.25988	0.0747181	Unchanged	1.78456	0.00166359	Up-regulated	1.12472	0.467607	Unchanged
ENSG00000204291	COL15A1	protein_coding	1.38764	0.0682856	Unchanged	1.64626	0.0145872	Up-regulated	1.09878	0.596977	Unchanged
ENSG00000204347	BTBD17	protein_coding	1.58509	0.000291941	Up-regulated	0.865731	0.289783	Unchanged	0.185682	1	Unchanged
ENSG00000204397	CARD16	protein_coding	1.52951	0.0354071	Up-regulated	1.81404	0.0170389	Up-regulated	1.36613	0.467607	Unchanged
ENSG00000204472	AIF1	protein_coding	1.06619	0.0809485	Unchanged	1.49024	0.00608028	Up-regulated	1.01476	0.467607	Unchanged
ENSG00000204482	LST1	protein_coding	1.34199	0.143519	Unchanged	1.85621	0.00723754	Up-regulated	1.20583	0.469202	Unchanged
ENSG00000205045	SLFN12L	protein_coding	1.29489	0.315234	Unchanged	2.01875	0.0120149	Up-regulated	1.64992	0.469202	Unchanged
ENSG00000205086	LINC02898	lncRNA	2.67627	0.104403	Unchanged	2.97872	0.0338176	Up-regulated	0.289436	1	Unchanged
ENSG00000205231	TTLL10-AS1	lncRNA	2.50353	0.00149597	Up-regulated	2.18143	0.00308219	Up-regulated	1.11742	0.740204	Unchanged
ENSG00000211448	DIO2	protein_coding	1.6599	0.00831329	Up-regulated	1.72045	0.00403088	Up-regulated	0.751168	0.844722	Unchanged
ENSG00000211592	IGKC	IG_C_gene	2.94785	0.0247023	Up-regulated	4.55346	0.000726024	Up-regulated	2.36423	0.469202	Unchanged
ENSG00000211598	IGKV4-1	IG_V_gene	3.21004	0.113423	Unchanged	4.3609	0.0154282	Up-regulated	-1.07786	1	Unchanged
ENSG00000211611	IGKV6-21	IG_V_gene	0.734195	0.713381	Unchanged	5.37203	0.0109647	Up-regulated	0.455653	1	Unchanged
ENSG00000211637	IGLV4-69	IG_V_gene	4.71187	0.0702163	Unchanged	8.06836	0.000594135	Up-regulated	2.82602	0.773299	Unchanged
ENSG00000211645	IGLV1-50	IG_V_gene	-3.72607	0.0183248	Down-regulated	-0.254762	1	Unchanged	-1.45674	0.844809	Unchanged
ENSG00000211648	IGLV1-47	IG_V_gene	4.14654	0.0274516	Up-regulated	8.26819	0.000756728	Up-regulated	3.16707	0.589718	Unchanged
ENSG00000211650	IGLV5-45	IG_V_gene	1.57831	0.640242	Unchanged	6.45465	0.00337487	Up-regulated	1.47216	1	Unchanged
ENSG00000211658	IGLV3-27	IG_V_gene	3.08602	0.27154	Unchanged	7.23859	0.0126272	Up-regulated	1.09769	1	Unchanged
ENSG00000211662	IGLV3-21	IG_V_gene	3.14602	0.228188	Unchanged	5.6387	0.0495738	Up-regulated	2.4204	0.773359	Unchanged
ENSG00000211663	IGLV3-19	IG_V_gene	4.35994	0.0701529	Unchanged	6.3213	0.0111055	Up-regulated	0.499817	1	Unchanged
ENSG00000211666	IGLV2-14	IG_V_gene	4.37627	0.0646903	Unchanged	7.75487	2.68887e-05	Up-regulated	4.55354	0.230324	Unchanged
ENSG00000211668	IGLV2-11	IG_V_gene	2.99399	0.226623	Unchanged	6.18501	0.00320687	Up-regulated	4.87815	0.175832	Unchanged
ENSG00000211669	IGLV3-10	IG_V_gene	4.79602	0.0210351	Up-regulated	5.99598	0.069111	Unchanged	2.40151	0.978396	Unchanged
ENSG00000211670	IGLV3-9	IG_V_gene	3.91408	0.135554	Unchanged	6.94784	0.0111055	Up-regulated	0.820303	1	Unchanged
ENSG00000211673	IGLV3-1	IG_V_gene	3.74236	0.0775419	Unchanged	6.7985	0.00275174	Up-regulated	1.12143	0.978396	Unchanged
ENSG00000211677	IGLC2	IG_C_gene	4.81894	0.00107656	Up-regulated	6.31893	3.52889e-06	Up-regulated	3.44906	0.210515	Unchanged
ENSG00000211679	IGLC3	IG_C_gene	2.7914	0.0687434	Unchanged	5.54973	0.000893243	Up-regulated	2.29482	0.483679	Unchanged
ENSG00000211772	TRBC2	TR_C_gene	1.96095	0.0683446	Unchanged	2.77329	0.000467577	Up-regulated	2.17367	0.112718	Unchanged
ENSG00000211890	IGHA2	IG_C_gene	5.06163	0.0065685	Up-regulated	6.59578	0.000360485	Up-regulated	3.81858	0.224267	Unchanged
ENSG00000211892	IGHG4	IG_C_gene	3.08455	0.0635788	Unchanged	5.81296	0.0234482	Up-regulated	2.31893	0.858245	Unchanged
ENSG00000211893	IGHG2	IG_C_gene	4.03172	0.0229756	Up-regulated	4.71051	0.0457217	Up-regulated	0.807253	1	Unchanged
ENSG00000211895	IGHA1	IG_C_gene	2.4715	0.114902	Unchanged	3.56292	0.0157617	Up-regulated	1.6022	0.844809	Unchanged
ENSG00000211896	IGHG1	IG_C_gene	4.54777	0.00943888	Up-regulated	5.99224	0.000467577	Up-regulated	3.98123	0.298713	Unchanged
ENSG00000211897	IGHG3	IG_C_gene	4.32107	0.0139126	Up-regulated	6.33247	0.000242996	Up-regulated	3.7436	0.374852	Unchanged
ENSG00000211945	IGHV1-18	IG_V_gene	5.0056	0.0550138	Unchanged	8.37946	0.000242996	Up-regulated	1.87299	1	Unchanged
ENSG00000211950	IGHV1-24	IG_V_gene	3.68029	0.222536	Unchanged	6.31612	0.0389669	Up-regulated	1.60591	0.978396	Unchanged
ENSG00000211956	IGHV4-34	IG_V_gene	2.90243	0.256845	Unchanged	5.4298	0.00922148	Up-regulated	1.60538	0.9577	Unchanged
ENSG00000211962	IGHV1-46	IG_V_gene	3.03446	0.135844	Unchanged	6.06966	0.010156	Up-regulated	2.7755	0.483679	Unchanged
ENSG00000211966	IGHV5-51	IG_V_gene	4.1036	0.0898443	Unchanged	7.14245	0.00377624	Up-regulated	3.1309	0.62756	Unchanged
ENSG00000211973	IGHV1-69	IG_V_gene	3.0249	0.138305	Unchanged	6.56851	0.00650236	Up-regulated	0.612207	1	Unchanged
ENSG00000213344	PCNPP3	processed_pseudogene	-2.52313	0.110688	Unchanged	-3.43339	0.0227233	Down-regulated	-1.96891	0.606496	Unchanged
ENSG00000213658	LAT	protein_coding	2.27771	0.0183248	Up-regulated	1.03295	0.739837	Unchanged	1.23644	0.687556	Unchanged
ENSG00000214210	ENSG00000214210	processed_pseudogene	-2.15218	0.0483048	Down-regulated	-1.40038	0.9239	Unchanged	-0.477574	1	Unchanged
ENSG00000217646	H2BC16P	processed_pseudogene	-1.9203	0.629903	Unchanged	-2.63509	0.0234482	Down-regulated	-2.49229	0.889119	Unchanged
ENSG00000219622	ENSG00000219622	processed_pseudogene	0.676536	1	Unchanged	1.86806e-16	1	Unchanged	3.18545	0.00326217	Up-regulated
ENSG00000220557	HMGB1P13	processed_pseudogene	1.46792	0.983513	Unchanged	2.59026	0.0120695	Up-regulated	0.445829	1	Unchanged
ENSG00000223551	TMSB4XP4	processed_pseudogene	1.0538	0.104459	Unchanged	1.25738	0.0334896	Up-regulated	0.826155	0.483679	Unchanged
ENSG00000223660	ENSG00000223660	lncRNA	-0.640692	1	Unchanged	-2.58246	0.0464613	Down-regulated	-1.75314	0.888697	Unchanged
ENSG00000223865	HLA-DPB1	protein_coding	1.03501	0.126924	Unchanged	1.6377	0.000893243	Up-regulated	0.889746	0.483679	Unchanged
ENSG00000223884	ENSG00000223884	lncRNA	1.74353	0.00831329	Up-regulated	1.81463	0.00723754	Up-regulated	1.20647	0.38528	Unchanged
ENSG00000224114	ENSG00000224114	processed_pseudogene	2.39146	0.0476587	Up-regulated	1.05744	0.803391	Unchanged	0.671273	1	Unchanged
ENSG00000224228	ENSG00000224228	lncRNA	3.94824	0.010482	Up-regulated	0.0586096	1	Unchanged	2.46234	0.483679	Unchanged
ENSG00000224329	LINC00297	lncRNA	-2.14579	0.0654831	Unchanged	-2.47753	0.0457217	Down-regulated	-1.87629	1	Unchanged
ENSG00000224387	ENSG00000224387	lncRNA	1.8736	0.0237003	Up-regulated	0.98337	0.605762	Unchanged	0.882294	0.845723	Unchanged
ENSG00000224389	C4B	protein_coding	2.69905	0.163372	Unchanged	4.52669	0.00092639	Up-regulated	2.55572	0.469202	Unchanged
ENSG00000225077	ICMT-DT	lncRNA	-2.18001	0.183955	Unchanged	-2.5219	0.0457217	Down-regulated	-2.1924	0.427821	Unchanged
ENSG00000225126	CAMTA1-AS1	lncRNA	2.33474	0.00927375	Up-regulated	1.38028	0.457192	Unchanged	0.378602	1	Unchanged
ENSG00000225370	ENSG00000225370	unprocessed_pseudogene	0.572089	0.877142	Unchanged	3.64877	0.0498172	Up-regulated	2.93578	0.467607	Unchanged
ENSG00000225756	DBH-AS1	lncRNA	1.53312	0.0306205	Up-regulated	1.18786	0.259508	Unchanged	0.950017	0.483679	Unchanged
ENSG00000225833	GS1-594A7.3	lncRNA	-1.84419	0.0441392	Down-regulated	-1.89026	0.0457217	Down-regulated	-0.864184	0.670501	Unchanged
ENSG00000225968	ELFN1	protein_coding	2.40179	0.00150683	Up-regulated	1.7948	0.169959	Unchanged	0.553596	1	Unchanged
ENSG00000226017	PRICKLE2-AS3	lncRNA	1.33584	0.00956241	Up-regulated	0.919624	0.202562	Unchanged	0.861781	0.469202	Unchanged
ENSG00000226453	LINC02542	lncRNA	1.78662	0.0264997	Up-regulated	1.66651	0.272931	Unchanged	1.44369	0.469202	Unchanged
ENSG00000227209	WARS2P1	processed_pseudogene	-0.0676787	1	Unchanged	1.7701	0.0448873	Up-regulated	-2.05288e-16	1	Unchanged
ENSG00000227589	TP73-AS3	lncRNA	1.95152	0.00174371	Up-regulated	1.76594	0.0273381	Up-regulated	0.876919	0.717252	Unchanged
ENSG00000227733	ENSG00000227733	lncRNA	-0.467403	0.587196	Unchanged	-1.39482	0.00548373	Down-regulated	-0.815633	0.35848	Unchanged
ENSG00000228536	LYPLAL1-AS1	lncRNA	2.65056	0.0306205	Up-regulated	2.13904	0.0899158	Unchanged	0.204616	1	Unchanged
ENSG00000229344	MTCO2P12	unprocessed_pseudogene	3.13223	0.0172333	Up-regulated	-0.125392	1	Unchanged	0.685409	0.927052	Unchanged
ENSG00000229391	HLA-DRB6	transcribed_unprocessed_pseudogene	1.5287	0.0392455	Up-regulated	2.17961	0.00837776	Up-regulated	1.44258	0.472846	Unchanged
ENSG00000230531	MTND5P7	unprocessed_pseudogene	0.460974	0.806649	Unchanged	1.86806e-16	1	Unchanged	2.42953	0.0147223	Up-regulated
ENSG00000231134	TCF7L1-IT1	lncRNA	3.78119	0.0167995	Up-regulated	1.71942	0.777936	Unchanged	2.04063	0.619743	Unchanged
ENSG00000231280	SALL4P6	processed_pseudogene	-2.02363	0.763899	Unchanged	-2.67593	0.0331943	Down-regulated	-2.4863	0.971298	Unchanged
ENSG00000231389	HLA-DPA1	protein_coding	1.06696	0.166074	Unchanged	1.64741	0.00439118	Up-regulated	1.07252	0.483679	Unchanged
ENSG00000231943	PGM5P4-AS1	lncRNA	1.37949	0.0488364	Up-regulated	1.35859	0.02346	Up-regulated	1.07735	0.563686	Unchanged
ENSG00000232629	HLA-DQB2	protein_coding	2.13641	0.00306373	Up-regulated	2.62508	0.00466717	Up-regulated	2.22567	0.298713	Unchanged
ENSG00000233929	MT1XP1	processed_pseudogene	-0.729869	0.35348	Unchanged	-1.27136	0.0468247	Down-regulated	-0.654877	0.794965	Unchanged
ENSG00000234415	RPL5P7	processed_pseudogene	-1.65055	0.0237003	Down-regulated	-0.816021	1	Unchanged	-1.47713	0.469202	Unchanged
ENSG00000234745	HLA-B	protein_coding	0.984248	0.00514356	Unchanged	1.111	0.00299981	Up-regulated	0.660674	0.516717	Unchanged
ENSG00000234766	LINC01496	lncRNA	3.10561	0.0257558	Up-regulated	2.01411	0.495101	Unchanged	1.26456	0.900091	Unchanged
ENSG00000235020	ENSG00000235020	lncRNA	1.28529	0.00478621	Up-regulated	0.620043	0.472992	Unchanged	0.193864	1	Unchanged
ENSG00000235531	MSC-AS1	lncRNA	1.71347	0.0181824	Up-regulated	1.27951	0.123893	Unchanged	0.833669	0.694835	Unchanged
ENSG00000235967	COX5BP3	processed_pseudogene	2.16689	0.0480517	Up-regulated	1.57965	0.561622	Unchanged	-0.336139	1	Unchanged
ENSG00000236125	USP17L4	protein_coding	-1.60146	0.0461551	Down-regulated	-1.90747	0.0598751	Unchanged	-1.80291	0.467607	Unchanged
ENSG00000236389	ENSG00000236389	lncRNA	-1.42398	0.63782	Unchanged	-3.54657	0.0173296	Down-regulated	-0.10577	1	Unchanged
ENSG00000236963	LINC01141	lncRNA	2.16154	0.0486285	Up-regulated	0.940465	0.813508	Unchanged	0.933881	0.878725	Unchanged
ENSG00000237187	NR2F1-AS1	lncRNA	0.862689	0.261799	Unchanged	1.13822	0.0351087	Up-regulated	0.875178	0.578896	Unchanged
ENSG00000237541	HLA-DQA2	protein_coding	1.87181	0.0337927	Up-regulated	2.68129	0.00287453	Up-regulated	1.40669	0.602567	Unchanged
ENSG00000237988	OR2I1P	protein_coding	2.6896	0.1811	Unchanged	4.49542	0.00298136	Up-regulated	2.25595	0.722544	Unchanged
ENSG00000239855	IGKV1-6	IG_V_gene	2.90642	0.293077	Unchanged	7.76013	0.00104824	Up-regulated	1.23313	1	Unchanged
ENSG00000239951	IGKV3-20	IG_V_gene	3.20046	0.0257558	Up-regulated	5.06328	0.000712741	Up-regulated	3.42121	0.217645	Unchanged
ENSG00000240065	PSMB9	protein_coding	0.742846	0.235217	Unchanged	1.20967	0.00322543	Up-regulated	1.00995	0.35848	Unchanged
ENSG00000240382	IGKV1-17	IG_V_gene	5.62387	0.00306373	Up-regulated	6.99904	0.0149065	Up-regulated	4.1976	0.427554	Unchanged
ENSG00000240864	IGKV1-16	IG_V_gene	2.58987	0.0444462	Up-regulated	1.17471	0.650662	Unchanged	0.517826	1	Unchanged
ENSG00000241351	IGKV3-11	IG_V_gene	2.35779	0.305414	Unchanged	4.63129	0.0228244	Up-regulated	0.423485	1	Unchanged
ENSG00000242100	RPL9P32	processed_pseudogene	1.44143	0.0301984	Up-regulated	0.527552	0.712691	Unchanged	0.441808	0.974599	Unchanged
ENSG00000242574	HLA-DMB	protein_coding	1.48399	0.0530831	Unchanged	2.13573	0.00245242	Up-regulated	1.10163	0.638379	Unchanged
ENSG00000242614	RN7SL164P	misc_RNA	1.30312	0.0421694	Up-regulated	0.671361	0.761025	Unchanged	0.301825	1	Unchanged
ENSG00000243238	IGKV2-30	IG_V_gene	2.18627	0.706001	Unchanged	5.32991	0.00759777	Up-regulated	-0.440865	1	Unchanged
ENSG00000243795	LINC02044	lncRNA	-1.38528	0.0346081	Down-regulated	-0.569746	0.797566	Unchanged	-0.304921	1	Unchanged
ENSG00000243806	RPL7P18	processed_pseudogene	3.46305	0.0264997	Up-regulated	2.32019	0.47504	Unchanged	2.72375	0.372049	Unchanged
ENSG00000243959	RN7SL684P	misc_RNA	0.335086	1	Unchanged	-2.76436	0.0407798	Down-regulated	-0.831499	1	Unchanged
ENSG00000244437	IGKV3-15	IG_V_gene	6.62371	7.28935e-05	Up-regulated	7.36407	0.000752683	Up-regulated	0.780906	1	Unchanged
ENSG00000244468	ENSG00000244468	lncRNA	-1.09973	0.67185	Unchanged	-2.41078	0.0463301	Down-regulated	-1.8359	0.696407	Unchanged
ENSG00000244509	APOBEC3C	protein_coding	0.607772	0.3857	Unchanged	1.01268	0.0141387	Up-regulated	0.624183	0.483679	Unchanged
ENSG00000244561	ENSG00000244561	processed_pseudogene	-2.14579	0.0654831	Unchanged	-2.47753	0.0457217	Down-regulated	-2.42209	0.223147	Unchanged
ENSG00000244575	IGKV1-27	IG_V_gene	4.00058	0.136025	Unchanged	5.47039	0.0235497	Up-regulated	3.95148	0.499128	Unchanged
ENSG00000244682	FCGR2C	protein_coding	1.49606	0.166151	Unchanged	2.0625	0.0454212	Up-regulated	2.03157	0.224267	Unchanged
ENSG00000244731	C4A	protein_coding	1.84498	0.318587	Unchanged	3.26499	0.00486806	Up-regulated	1.6841	0.682229	Unchanged
ENSG00000246130	ENSG00000246130	lncRNA	3.73146	0.0262458	Up-regulated	0.651246	1	Unchanged	2.34155	0.621046	Unchanged
ENSG00000247381	PLUT	lncRNA	-1.0055	0.00955557	Down-regulated	-0.621561	0.379138	Unchanged	0.0435827	1	Unchanged
ENSG00000247809	NR2F2-AS1	lncRNA	1.87451	0.00328552	Up-regulated	1.58025	0.00983012	Up-regulated	1.46296	0.221063	Unchanged
ENSG00000250266	LINC01612	lncRNA	-1.06554	0.00758854	Down-regulated	-0.684374	0.195596	Unchanged	-0.312514	0.858245	Unchanged
ENSG00000250640	OR7E41P	unprocessed_pseudogene	3.6981	0.167919	Unchanged	4.28717	0.0402121	Up-regulated	-0.182448	1	Unchanged
ENSG00000251003	ZFPM2-AS1	lncRNA	1.80926	0.0455912	Up-regulated	0.993751	0.702846	Unchanged	1.27239	0.483679	Unchanged
ENSG00000251059	PRKG2-AS1	lncRNA	3.07257	0.0162808	Up-regulated	3.58067	0.0565095	Unchanged	1.53168	0.989414	Unchanged
ENSG00000251095	ENSG00000251095	lncRNA	1.22246	0.0027082	Up-regulated	0.282293	0.893948	Unchanged	0.0125621	1	Unchanged
ENSG00000251171	ENSG00000251171	lncRNA	1.59072	0.141162	Unchanged	2.02671	0.0285699	Up-regulated	1.62563	0.469202	Unchanged
ENSG00000251504	LINC01099	lncRNA	-1.28208	0.00831329	Down-regulated	-0.643786	0.624203	Unchanged	-0.175722	1	Unchanged
ENSG00000253234	IGLV2-5	IG_V_pseudogene	1.64912	0.478434	Unchanged	5.82324	0.0375441	Up-regulated	3.10538	0.644073	Unchanged
ENSG00000253273	ENSG00000253273	unprocessed_pseudogene	2.74545	0.0476587	Up-regulated	2.07431	0.318485	Unchanged	2.08082	0.52421	Unchanged
ENSG00000253621	RPSAP74	processed_pseudogene	3.87985	0.0424238	Up-regulated	1.84866	0.776355	Unchanged	1.98717	0.722544	Unchanged
ENSG00000253755	IGHGP	IG_C_pseudogene	3.25566	0.075343	Unchanged	5.07752	0.0129683	Up-regulated	3.03153	0.483679	Unchanged
ENSG00000255829	ENSG00000255829	lncRNA	-1.5399	6.11394e-05	Down-regulated	-1.33709	0.0111231	Down-regulated	-0.191393	1	Unchanged
ENSG00000255836	ENSG00000255836	processed_pseudogene	1.87671	0.0113846	Up-regulated	0.39225	0.80637	Unchanged	0.76776	0.452986	Unchanged
ENSG00000256540	IQSEC3-AS1	lncRNA	1.2645	0.0162808	Up-regulated	0.346504	0.906769	Unchanged	0.444234	0.859445	Unchanged
ENSG00000256814	ENSG00000256814	lncRNA	3.82133	0.0148619	Up-regulated	0.627719	1	Unchanged	1.56976	0.955982	Unchanged
ENSG00000256925	ADGRA1-AS1	lncRNA	-1.09884	0.634618	Unchanged	-2.63837	0.0477863	Down-regulated	-1.21241	0.858245	Unchanged
ENSG00000256995	LINC02955	lncRNA	3.47365	0.0282509	Up-regulated	0.493687	1	Unchanged	1.70981	0.705832	Unchanged
ENSG00000258405	ZNF578	protein_coding	-1.23053	0.0183248	Down-regulated	-0.599378	0.652051	Unchanged	-0.247834	1	Unchanged
ENSG00000258450	ENSG00000258450	lncRNA	2.25137	0.0183248	Up-regulated	0.674195	0.943117	Unchanged	1.74737	0.341818	Unchanged
ENSG00000258498	DIO3OS	lncRNA	2.44968	0.00370512	Up-regulated	1.91255	0.0660491	Unchanged	1.96852	0.331924	Unchanged
ENSG00000258581	ENSG00000258581	processed_pseudogene	-1.08669	0.180541	Unchanged	-1.59323	0.0172876	Down-regulated	-1.0301	0.467607	Unchanged
ENSG00000259351	ENSG00000259351	lncRNA	1.54762	0.0497515	Up-regulated	1.233	0.340726	Unchanged	1.27859	0.368266	Unchanged
ENSG00000259367	AKAP13-AS1	lncRNA	1.39092	0.0340191	Up-regulated	0.770269	0.661328	Unchanged	0.555367	0.971749	Unchanged
ENSG00000259370	ENSG00000259370	lncRNA	2.8644	0.0480517	Up-regulated	2.74472	0.0365896	Up-regulated	1.90188	0.717252	Unchanged
ENSG00000259392	ENSG00000259392	transcribed_processed_pseudogene	1.49654	0.0206083	Up-regulated	1.23947	0.181087	Unchanged	0.727926	0.738269	Unchanged
ENSG00000260086	ENSG00000260086	lncRNA	-1.39502	0.00488887	Down-regulated	-0.278082	0.932054	Unchanged	0.208533	1	Unchanged
ENSG00000261468	ENSG00000261468	lncRNA	1.16421	0.481744	Unchanged	2.02492	0.0380609	Up-regulated	1.47078	0.483679	Unchanged
ENSG00000263883	EEF1DP7	transcribed_processed_pseudogene	1.2215	0.0480517	Up-regulated	0.56405	0.871069	Unchanged	0.551575	0.978396	Unchanged
ENSG00000263961	RHEX	protein_coding	1.31056	0.0165825	Up-regulated	1.31831	0.0803202	Unchanged	1.2411	0.351974	Unchanged
ENSG00000264714	KIAA0895LP1	transcribed_processed_pseudogene	2.81939	0.0237003	Up-regulated	1.89997	0.335346	Unchanged	2.8197	0.253215	Unchanged
ENSG00000264808	ENSG00000264808	lncRNA	-2.11638	0.0167709	Down-regulated	-1.36564	0.277693	Unchanged	-0.168949	1	Unchanged
ENSG00000265179	ENSG00000265179	lncRNA	-1.05878	0.00964574	Down-regulated	-0.858248	0.140331	Unchanged	-0.247047	0.989414	Unchanged
ENSG00000266533	MIR3619	miRNA	1.41211	0.354345	Unchanged	1.68073	0.0499624	Up-regulated	0.735073	1	Unchanged
ENSG00000268078	ENSG00000268078	lncRNA	1.76227	0.035876	Up-regulated	0.57991	1	Unchanged	0.442741	1	Unchanged
ENSG00000270106	TSNAX-DISC1	protein_coding	3.33423	0.0488541	Up-regulated	2.40816	0.306312	Unchanged	2.44046	0.368266	Unchanged
ENSG00000270415	DPPA3P3	processed_pseudogene	-2.25194	0.379891	Unchanged	-2.63094	0.0450251	Down-regulated	-2.39958	0.901872	Unchanged
ENSG00000270533	ENSG00000270533	transcribed_processed_pseudogene	-1.017	0.300614	Unchanged	-1.71957	0.0317443	Down-regulated	-0.634663	0.875941	Unchanged
ENSG00000271368	ENSG00000271368	processed_pseudogene	0.0639851	1	Unchanged	1.7701	0.0448873	Up-regulated	-2.05288e-16	1	Unchanged
ENSG00000271503	CCL5	protein_coding	1.10843	0.126436	Unchanged	1.5029	0.036773	Up-regulated	1.25573	0.367114	Unchanged
ENSG00000271605	MILR1	protein_coding	1.54467	0.209955	Unchanged	2.19386	0.0215175	Up-regulated	1.64689	0.467607	Unchanged
ENSG00000272168	CASC15	lncRNA	1.02549	0.283186	Unchanged	1.57894	0.026426	Up-regulated	0.841273	0.791829	Unchanged
ENSG00000272235	ENSG00000272235	lncRNA	3.0675	0.0474266	Up-regulated	1.65211	0.791554	Unchanged	1.0509	1	Unchanged
ENSG00000273056	ENSG00000273056	lncRNA	-3.66131	0.0306205	Down-regulated	-1.36663	0.811461	Unchanged	-2.7234	0.488416	Unchanged
ENSG00000273325	ENSG00000273325	lncRNA	-1.91172	0.0135018	Down-regulated	-0.225111	1	Unchanged	-0.661656	0.875941	Unchanged
ENSG00000273972	ENSG00000273972	lncRNA	1.95696	0.0490356	Up-regulated	1.40711	0.232201	Unchanged	0.744277	0.978396	Unchanged
ENSG00000274244	ENSG00000274244	lncRNA	-3.16179	0.020861	Down-regulated	-2.03972	0.247229	Unchanged	-0.820555	1	Unchanged
ENSG00000274565	ENSG00000274565	lncRNA	2.73545	0.0326795	Up-regulated	1.51491	0.491588	Unchanged	1.67479	0.406678	Unchanged
ENSG00000275302	CCL4	protein_coding	1.39665	0.150091	Unchanged	2.26188	0.00223132	Up-regulated	1.5495	0.38528	Unchanged
ENSG00000275395	FCGBP	protein_coding	1.10116	0.1625	Unchanged	2.05763	0.00217453	Up-regulated	0.867711	0.563734	Unchanged
ENSG00000277595	ENSG00000277595	lncRNA	2.22297	0.0417763	Up-regulated	1.22997	0.691002	Unchanged	1.49367	0.469879	Unchanged
ENSG00000277837	ENSG00000277837	lncRNA	2.3282	0.0113308	Up-regulated	1.17727	0.730171	Unchanged	0.796254	0.978396	Unchanged
ENSG00000278255	ENSG00000278255	lncRNA	2.52	0.0480517	Up-regulated	1.57598	0.381622	Unchanged	0.714174	1	Unchanged
ENSG00000278518	ENSG00000278518	lncRNA	3.62092	0.0288223	Up-regulated	1.38204	0.959955	Unchanged	2.50048	0.500004	Unchanged
ENSG00000279953	ENSG00000279953	TEC	-3.41284	0.00745067	Down-regulated	-1.71824	0.573195	Unchanged	-1.84522	0.592823	Unchanged
ENSG00000280119	ENSG00000280119	TEC	1.0087	0.0124747	Up-regulated	0.808518	0.0986569	Unchanged	0.505271	0.589718	Unchanged
ENSG00000280306	ENSG00000280306	TEC	-0.653322	1	Unchanged	-2.83543	0.0194431	Down-regulated	-1.59548	0.978396	Unchanged
ENSG00000282122	IGHV7-4-1	IG_V_gene	0.484827	0.569688	Unchanged	5.37556	0.0365896	Up-regulated	1.91765	0.867908	Unchanged
ENSG00000282757	DUXB	protein_coding	2.09491	0.0456815	Up-regulated	1.15939	0.493773	Unchanged	0.970169	0.779849	Unchanged
ENSG00000284653	ENSG00000284653	lncRNA	5.67283	1.33111e-11	Up-regulated	3.47075	0.00934163	Up-regulated	1.74394	0.759829	Unchanged
ENSG00000284721	ENSG00000284721	lncRNA	2.33148	0.0181455	Up-regulated	0.53466	1	Unchanged	1.33262	0.499128	Unchanged
ENSG00000285190	ENSG00000285190	lncRNA	-1.49134	0.0480517	Down-regulated	-0.941323	0.360841	Unchanged	-0.176331	1	Unchanged
ENSG00000285205	ENSG00000285205	lncRNA	-2.60407	0.339989	Unchanged	-3.40296	0.246297	Unchanged	-3.94585	0.00914069	Down-regulated
ENSG00000285538	ENSG00000285538	lncRNA	-2.01592	0.000214805	Down-regulated	-1.05573	0.498399	Unchanged	-0.300825	1	Unchanged
ENSG00000285593	ENSG00000285593	lncRNA	1.02565	0.0165825	Up-regulated	0.524646	0.502096	Unchanged	0.279293	1	Unchanged
ENSG00000285676	ENSG00000285676	lncRNA	1.44116	0.0243268	Up-regulated	0.552602	0.861604	Unchanged	0.699405	0.667767	Unchanged
ENSG00000286000	ENSG00000286000	lncRNA	1.5312	0.0456815	Up-regulated	0.946543	0.690979	Unchanged	0.951881	0.712454	Unchanged
ENSG00000286153	ENSG00000286153	lncRNA	1.02336	0.767146	Unchanged	2.28343	0.0278067	Up-regulated	1.60497	0.483679	Unchanged
ENSG00000286313	ENSG00000286313	lncRNA	1.77708	0.010482	Up-regulated	0.66003	0.843669	Unchanged	0.720961	0.906996	Unchanged
ENSG00000286656	ENSG00000286656	lncRNA	1.73016	0.58399	Unchanged	3.50634	0.0227233	Up-regulated	3.31496	0.210402	Unchanged
ENSG00000286693	ENSG00000286693	lncRNA	-1.34278	0.000180528	Down-regulated	-0.654064	0.222694	Unchanged	-0.227641	1	Unchanged
ENSG00000286791	ENSG00000286791	lncRNA	1.78194	0.0134506	Up-regulated	1.04767	0.36395	Unchanged	1.26694	0.467607	Unchanged
ENSG00000286836	ENSG00000286836	lncRNA	-2.43144	0.01934	Down-regulated	-1.54267	0.714799	Unchanged	0.0249729	1	Unchanged
ENSG00000287310	ENSG00000287310	lncRNA	-2.10469	0.3857	Unchanged	-3.6866	0.0141387	Down-regulated	-0.799788	1	Unchanged
ENSG00000287544	ENSG00000287544	lncRNA	-2.2286	0.253555	Unchanged	-3.61614	0.0220398	Down-regulated	-1.86841	0.56735	Unchanged
ENSG00000287839	ENSG00000287839	lncRNA	2.34542	0.0522499	Unchanged	2.88385	0.0285699	Up-regulated	2.54611	0.244077	Unchanged
ENSG00000288771	ENSG00000288771	lncRNA	2.47004	0.0809485	Unchanged	3.07986	0.0236648	Up-regulated	2.02322	0.589718	Unchanged
ENSG00000288853	ENSG00000288853	lncRNA	2.86539	0.109042	Unchanged	3.51142	0.0415201	Up-regulated	2.11188	0.483679	Unchanged
ENSG00000288965	ENSG00000288965	lncRNA	2.6304	0.0183248	Up-regulated	1.41294	0.547196	Unchanged	0.911214	0.989414	Unchanged
ENSG00000289057	ENSG00000289057	lncRNA	1.71799	0.0354071	Up-regulated	0.755083	0.736765	Unchanged	1.14973	0.558413	Unchanged
ENSG00000289488	ENSG00000289488	lncRNA	1.19212	0.0669578	Unchanged	1.63963	0.0128051	Up-regulated	1.14639	0.35848	Unchanged
ENSG00000289550	ENSG00000289550	lncRNA	3.60239	0.0417763	Up-regulated	2.7271	0.602984	Unchanged	3.29636	0.469202	Unchanged

## Sheet: Table_S2
Supplementary Table S2. List of differentially expressed genes shared between T2D and T3cD patients compared to the control subjects.
				T2D vs Control		T3cD vs Control
Differential Expression	Ensembl Gene ID	Gene Symbol	Biotype	log2 (Fold Change)	FDR	log2 (Fold Change)	FDR
Up-regulated	ENSG00000000971	CFH	Protein_Coding	1.8577	0.00771089	2.08094	0.00188516
Up-regulated	ENSG00000010932	FMO1	Protein_Coding	1.57119	0.0228317	1.84447	0.00104554
Up-regulated	ENSG00000019582	CD74	Protein_Coding	1.29492	0.0294417	1.89071	0.000242996
Up-regulated	ENSG00000020633	RUNX3	Protein_Coding	1.76488	0.0343379	2.0588	0.0111231
Up-regulated	ENSG00000024422	EHD2	Protein_Coding	1.3111	0.025905	1.36414	0.0154282
Up-regulated	ENSG00000026025	VIM	Protein_Coding	1.36948	0.010482	1.49661	0.00140986
Up-regulated	ENSG00000026103	FAS	Protein_Coding	1.16997	0.00306373	1.07401	0.00620491
Up-regulated	ENSG00000038427	VCAN	Protein_Coding	1.69473	0.0264997	1.90209	0.00613985
Up-regulated	ENSG00000050165	DKK3	Protein_Coding	1.93303	1.36882e-10	1.55984	0.000528392
Up-regulated	ENSG00000064300	NGFR	Protein_Coding	1.79934	0.0254593	1.56857	0.0392403
Up-regulated	ENSG00000066294	CD84	Protein_Coding	1.80281	0.0424238	1.95232	0.0135149
Up-regulated	ENSG00000077942	FBLN1	Protein_Coding	1.68671	0.00702289	1.65542	0.00629824
Up-regulated	ENSG00000081237	PTPRC	Protein_Coding	1.76777	0.00986	2.09029	0.00188516
Up-regulated	ENSG00000087245	MMP2	Protein_Coding	1.94144	0.00398138	1.81598	0.00436522
Up-regulated	ENSG00000088882	CPXM1	Protein_Coding	2.62421	0.0456815	3.0649	0.00245242
Up-regulated	ENSG00000091986	CCDC80	Protein_Coding	1.92738	0.0124236	1.71533	0.0109647
Up-regulated	ENSG00000094755	GABRP	Protein_Coding	3.31408	0.0183248	3.74365	0.00934163
Up-regulated	ENSG00000104894	CD37	Protein_Coding	1.49859	0.0113846	1.42592	0.0441799
Up-regulated	ENSG00000106333	PCOLCE	Protein_Coding	1.06565	0.0113846	1.28419	0.000448024
Up-regulated	ENSG00000108821	COL1A1	Protein_Coding	1.68196	0.0277927	2.42172	0.00140986
Up-regulated	ENSG00000110446	SLC15A3	Protein_Coding	1.53572	0.0456815	1.75174	0.0154282
Up-regulated	ENSG00000111087	GLI1	Protein_Coding	2.60974	0.00563326	2.82501	0.00114936
Up-regulated	ENSG00000111145	ELK3	Protein_Coding	1.18563	0.0113308	1.34637	0.00293118
Up-regulated	ENSG00000115414	FN1	Protein_Coding	1.22364	0.0456815	1.66791	0.00049889
Up-regulated	ENSG00000115604	IL18R1	Protein_Coding	1.60151	0.0488623	1.83248	0.0463027
Up-regulated	ENSG00000116690	PRG4	Protein_Coding	1.28907	0.000674639	1.54706	0.0127754
Up-regulated	ENSG00000121068	TBX2	Protein_Coding	1.62636	0.033762	1.55062	0.0378982
Up-regulated	ENSG00000122641	INHBA	Protein_Coding	1.06536	0.0193252	1.22021	0.00934163
Up-regulated	ENSG00000123243	ITIH5	Protein_Coding	1.02593	0.0190561	1.00329	0.0257779
Up-regulated	ENSG00000125730	C3	Protein_Coding	2.13464	0.0155883	2.54217	0.00223132
Up-regulated	ENSG00000129675	ARHGEF6	Protein_Coding	1.51675	0.019892	1.62165	0.0087324
Up-regulated	ENSG00000130635	COL5A1	Protein_Coding	1.46419	0.0276838	2.15457	0.000467577
Up-regulated	ENSG00000131747	TOP2A	Protein_Coding	2.39018	0.0343101	3.37941	0.00295177
Up-regulated	ENSG00000134817	APLNR	Protein_Coding	2.46217	0.00306373	2.54616	0.00298136
Up-regulated	ENSG00000135074	ADAM19	Protein_Coding	1.54715	0.0304859	1.81688	0.00360107
Up-regulated	ENSG00000135914	HTR2B	Protein_Coding	1.12995	0.0383956	1.30005	0.0375441
Up-regulated	ENSG00000136872	ALDOB	Protein_Coding	2.86448	4.22985e-07	2.16041	0.0037061
Up-regulated	ENSG00000137077	CCL21	Protein_Coding	4.02158	0.00673897	3.92894	0.0213796
Up-regulated	ENSG00000137841	PLCB2	Protein_Coding	1.70573	0.0488541	1.85766	0.0260213
Up-regulated	ENSG00000138119	MYOF	Protein_Coding	1.33825	0.00742276	1.43032	0.0152217
Up-regulated	ENSG00000138964	PARVG	Protein_Coding	1.60419	0.0282509	2.07667	0.00245242
Up-regulated	ENSG00000140678	ITGAX	Protein_Coding	1.67624	0.0347838	2.15099	0.0131184
Up-regulated	ENSG00000140931	CMTM3	Protein_Coding	1.17343	0.0309927	1.32823	0.0132696
Up-regulated	ENSG00000140968	IRF8	Protein_Coding	1.75391	0.00583156	1.46669	0.0385387
Up-regulated	ENSG00000141753	IGFBP4	Protein_Coding	1.47379	0.00831329	1.585	0.00127901
Up-regulated	ENSG00000142173	COL6A2	Protein_Coding	1.61944	0.00199049	1.33193	0.0103352
Up-regulated	ENSG00000143119	CD53	Protein_Coding	1.78435	0.0343379	2.26935	0.00299981
Up-regulated	ENSG00000143954	REG3G	Protein_Coding	3.28034	0.0241077	4.03477	0.00295177
Up-regulated	ENSG00000144057	ST6GAL2	Protein_Coding	2.23988	0.0448174	2.47522	0.0278965
Up-regulated	ENSG00000144485	HES6	Protein_Coding	1.50613	0.0292889	1.27069	0.036773
Up-regulated	ENSG00000148773	MKI67	Protein_Coding	2.93648	0.0176104	4.96478	3.52889e-06
Up-regulated	ENSG00000149257	SERPINH1	Protein_Coding	1.02963	0.0306205	1.28444	0.00245242
Up-regulated	ENSG00000150782	IL18	Protein_Coding	1.69112	0.0391557	1.96095	0.0119984
Up-regulated	ENSG00000154856	APCDD1	Protein_Coding	1.75606	0.0182251	2.21748	0.00116072
Up-regulated	ENSG00000155465	SLC7A7	Protein_Coding	1.33156	0.00956241	1.38606	0.00742946
Up-regulated	ENSG00000158869	FCER1G	Protein_Coding	1.40313	0.0456815	2.03871	0.00151161
Up-regulated	ENSG00000159403	C1R	Protein_Coding	1.82544	0.00454122	1.96995	0.00088284
Up-regulated	ENSG00000160255	ITGB2	Protein_Coding	2.09996	0.0124236	2.39713	0.00104554
Up-regulated	ENSG00000161381	PLXDC1	Protein_Coding	1.37668	0.0335506	1.80777	0.00377624
Up-regulated	ENSG00000162444	RBP7	Protein_Coding	1.21534	0.0199036	1.50473	0.0117063
Up-regulated	ENSG00000162511	LAPTM5	Protein_Coding	1.97348	0.0041505	2.4505	0.000242996
Up-regulated	ENSG00000162576	MXRA8	Protein_Coding	1.67107	0.0119541	1.76172	0.00293336
Up-regulated	ENSG00000165168	CYBB	Protein_Coding	1.61626	0.0435592	2.14453	0.000893243
Up-regulated	ENSG00000166033	HTRA1	Protein_Coding	1.03624	0.0187426	1.1797	0.00245242
Up-regulated	ENSG00000169403	PTAFR	Protein_Coding	1.57568	0.0263597	2.10093	0.00137313
Up-regulated	ENSG00000169442	CD52	Protein_Coding	2.0303	0.00831329	2.23516	0.00516999
Up-regulated	ENSG00000169554	ZEB2	Protein_Coding	1.14138	0.0461551	1.18328	0.0268298
Up-regulated	ENSG00000170509	HSD17B13	Protein_Coding	1.93918	3.91291e-07	1.49492	0.00637905
Up-regulated	ENSG00000172016	REG3A	Protein_Coding	4.13541	0.00150683	5.21054	5.28992e-05
Up-regulated	ENSG00000172037	LAMB2	Protein_Coding	1.18175	0.0162808	1.27391	0.00299981
Up-regulated	ENSG00000172236	TPSAB1	Protein_Coding	1.88752	0.00268862	1.91325	0.0220456
Up-regulated	ENSG00000172724	CCL19	Protein_Coding	3.51021	0.0119272	4.00427	0.0285699
Up-regulated	ENSG00000173372	C1QA	Protein_Coding	1.65819	0.0309427	2.2854	0.000209363
Up-regulated	ENSG00000176788	BASP1	Protein_Coding	1.4522	0.0171485	1.62631	0.0173296
Up-regulated	ENSG00000177337	DLGAP1-AS1	lncRNA	1.31467	0.0174857	1.28218	0.0257779
Up-regulated	ENSG00000177675	CD163L1	Protein_Coding	2.31943	0.0167709	2.05453	0.0494453
Up-regulated	ENSG00000181847	TIGIT	Protein_Coding	2.40732	0.0127664	3.06962	0.0150413
Up-regulated	ENSG00000182326	C1S	Protein_Coding	1.49667	0.0371775	1.71696	0.00486806
Up-regulated	ENSG00000182511	FES	Protein_Coding	1.80068	0.00514356	1.70321	0.000893243
Up-regulated	ENSG00000184489	PTP4A3	Protein_Coding	1.20115	0.0411153	1.44979	0.0401724
Up-regulated	ENSG00000187955	COL14A1	Protein_Coding	1.38578	0.0220939	1.536	0.00723754
Up-regulated	ENSG00000188153	COL4A5	Protein_Coding	2.03978	0.00758854	1.91646	0.0235497
Up-regulated	ENSG00000196126	HLA-DRB1	Protein_Coding	1.29612	0.0456815	1.77729	0.000893243
Up-regulated	ENSG00000196154	S100A4	Protein_Coding	1.70124	0.0113846	1.75619	0.0119984
Up-regulated	ENSG00000198053	SIRPA	Protein_Coding	1.07147	0.0480517	1.16495	0.0213796
Up-regulated	ENSG00000198959	TGM2	Protein_Coding	1.72274	0.0263416	2.2558	0.000448024
Up-regulated	ENSG00000203799	CCDC162P	Other	1.58866	0.0125981	1.53206	0.0441799
Up-regulated	ENSG00000204262	COL5A2	Protein_Coding	1.03937	0.00466077	1.25712	0.000467577
Up-regulated	ENSG00000204397	CARD16	Protein_Coding	1.52951	0.0354071	1.81404	0.0170389
Up-regulated	ENSG00000205231	TTLL10-AS1	lncRNA	2.50353	0.00149597	2.18143	0.00308219
Up-regulated	ENSG00000211448	DIO2	Protein_Coding	1.6599	0.00831329	1.72045	0.00403088
Up-regulated	ENSG00000211592	IGKC	Other	2.94785	0.0247023	4.55346	0.000726024
Up-regulated	ENSG00000211648	IGLV1-47	Other	4.14654	0.0274516	8.26819	0.000756728
Up-regulated	ENSG00000211677	IGLC2	Other	4.81894	0.00107656	6.31893	3.52889e-06
Up-regulated	ENSG00000211890	IGHA2	Other	5.06163	0.0065685	6.59578	0.000360485
Up-regulated	ENSG00000211893	IGHG2	Other	4.03172	0.0229756	4.71051	0.0457217
Up-regulated	ENSG00000211896	IGHG1	Other	4.54777	0.00943888	5.99224	0.000467577
Up-regulated	ENSG00000211897	IGHG3	Other	4.32107	0.0139126	6.33247	0.000242996
Up-regulated	ENSG00000223884	AC068481.1	lncRNA	1.74353	0.00831329	1.81463	0.00723754
Up-regulated	ENSG00000227589	AL136528.1	lncRNA	1.95152	0.00174371	1.76594	0.0273381
Up-regulated	ENSG00000229391	HLA-DRB6	Other	1.5287	0.0392455	2.17961	0.00837776
Up-regulated	ENSG00000231943	PGM5P4-AS1	lncRNA	1.37949	0.0488364	1.35859	0.02346
Up-regulated	ENSG00000232629	HLA-DQB2	Protein_Coding	2.13641	0.00306373	2.62508	0.00466717
Up-regulated	ENSG00000237541	HLA-DQA2	Protein_Coding	1.87181	0.0337927	2.68129	0.00287453
Up-regulated	ENSG00000239951	IGKV3-20	Other	3.20046	0.0257558	5.06328	0.000712741
Up-regulated	ENSG00000240382	IGKV1-17	Other	5.62387	0.00306373	6.99904	0.0149065
Up-regulated	ENSG00000244437	IGKV3-15	Other	6.62371	7.28935e-05	7.36407	0.000752683
Up-regulated	ENSG00000247809	NR2F2-AS1	lncRNA	1.87451	0.00328552	1.58025	0.00983012
Up-regulated	ENSG00000259370	AC103740.1	lncRNA	2.8644	0.0480517	2.74472	0.0365896
Up-regulated	ENSG00000284653	AL357509.1	lncRNA	5.67283	1.33111e-11	3.47075	0.00934163
Down-regulated	ENSG00000081181	ARG2	Protein_Coding	-1.77023	4.72591e-14	-1.0317	0.00608028
Down-regulated	ENSG00000163377	FAM19A4	Protein_Coding	-1.76566	0.0326795	-1.57574	0.0137317
Down-regulated	ENSG00000225833	AC097625.1	lncRNA	-1.84419	0.0441392	-1.89026	0.0457217
Down-regulated	ENSG00000255829	AC092490.2	lncRNA	-1.5399	6.11394e-05	-1.33709	0.0111231

## Sheet: Table_S3
Supplementary Table S3. List of differentially expressed genes in diabetic gastroparetics (DG) compared and non-diabetic gastroparetic (DC) compared to control subjects
			DG vs Control			DC vs Control
Ensembl Gene ID	Gene Symbol	Biotype	logFC_DG	FDR_DG	Expression_DG	logFC_DC	FDR_DC	Expression_DC
ENSG00000081479	LRP2	protein_coding	4.35455	0.00391491	Up-regulated	-2.93861	0.841719	Unchanged
ENSG00000100038	TOP3B	protein_coding	1.63967	0.0356459	Up-regulated	0.791137	1	Unchanged
ENSG00000109061	MYH1	protein_coding	7.23439	0.000194083	Up-regulated	4.66025	0.119192	Unchanged
ENSG00000119938	PPP1R3C	protein_coding	1.34597	2.16866e-05	Up-regulated	1.06309	0.841719	Unchanged
ENSG00000123838	C4BPA	protein_coding	3.8467	0.0239031	Up-regulated	-0.31361	1	Unchanged
ENSG00000124920	MYRF	protein_coding	1.63181	0.0253032	Up-regulated	-0.417968	1	Unchanged
ENSG00000125414	MYH2	protein_coding	6.63477	1.75286e-05	Up-regulated	4.08336	0.0341982	Up-regulated
ENSG00000126890	CTAG2	protein_coding	6.65574	0.0332454	Up-regulated	7.46072	0.0834711	Unchanged
ENSG00000127364	TAS2R4	protein_coding	1.42116	0.0290194	Up-regulated	0.400803	1	Unchanged
ENSG00000129204	USP6	protein_coding	2.55994	0.0129384	Up-regulated	0.461827	1	Unchanged
ENSG00000132915	PDE6A	protein_coding	1.32749	0.0275314	Up-regulated	0.859251	1	Unchanged
ENSG00000134323	MYCN	protein_coding	2.33003	7.48835e-05	Up-regulated	0.496808	1	Unchanged
ENSG00000135914	HTR2B	protein_coding	1.35482	0.025508	Up-regulated	-0.00658781	1	Unchanged
ENSG00000141738	GRB7	protein_coding	2.02575	0.0403167	Up-regulated	0.0190355	1	Unchanged
ENSG00000143375	CGN	protein_coding	1.7878	0.0209481	Up-regulated	-0.58511	1	Unchanged
ENSG00000143847	PPFIA4	protein_coding	1.20774	0.00743248	Up-regulated	0.739897	1	Unchanged
ENSG00000148204	CRB2	protein_coding	3.08899	0.00504926	Up-regulated	-0.558924	1	Unchanged
ENSG00000151962	RBM46	protein_coding	3.53514	0.0408217	Up-regulated	0.9818	1	Unchanged
ENSG00000154252	GAL3ST2	protein_coding	3.00016	0.00822591	Up-regulated	0.69683	1	Unchanged
ENSG00000159251	ACTC1	protein_coding	1.50243	0.00193114	Up-regulated	0.930451	1	Unchanged
ENSG00000163157	TMOD4	protein_coding	1.28614	0.049269	Up-regulated	0.0151548	1	Unchanged
ENSG00000164841	TMEM74	protein_coding	1.02851	0.0124947	Up-regulated	0.485327	1	Unchanged
ENSG00000165076	PRSS37	protein_coding	2.15264	0.0188666	Up-regulated	0.465189	1	Unchanged
ENSG00000167749	KLK4	protein_coding	3.09838	0.00780256	Up-regulated	1.08462	1	Unchanged
ENSG00000169495	HTRA4	protein_coding	2.48956	0.0182568	Up-regulated	0.339032	1	Unchanged
ENSG00000169594	BNC1	protein_coding	3.49377	0.0298996	Up-regulated	-1.68871	1	Unchanged
ENSG00000172061	LRRC15	protein_coding	1.49123	0.0192632	Up-regulated	0.334519	1	Unchanged
ENSG00000172367	PDZD3	protein_coding	3.09862	0.00271901	Up-regulated	-0.570593	1	Unchanged
ENSG00000172640	OR10AD1	protein_coding	2.44766	0.00545008	Up-regulated	2.3538	0.720558	Unchanged
ENSG00000173080	RXFP4	protein_coding	2.8675	0.0368075	Up-regulated	0.0564047	1	Unchanged
ENSG00000175315	CST6	protein_coding	2.91407	0.0146703	Up-regulated	0.01926	1	Unchanged
ENSG00000178772	CPN2	protein_coding	3.42856	0.0390778	Up-regulated	2.81447	1	Unchanged
ENSG00000179914	ITLN1	protein_coding	3.47065	0.0439216	Up-regulated	-4.16363	0.0962857	Unchanged
ENSG00000180440	SERTM1	protein_coding	1.83633	0.0257335	Up-regulated	-0.48281	1	Unchanged
ENSG00000180878	C11orf42	protein_coding	1.64026	0.017741	Up-regulated	0.643138	1	Unchanged
ENSG00000183691	NOG	protein_coding	1.24666	0.0396919	Up-regulated	0.366806	1	Unchanged
ENSG00000185614	INKA1	protein_coding	1.02999	0.0267586	Up-regulated	0.126891	1	Unchanged
ENSG00000188064	WNT7B	protein_coding	4.49672	0.0131985	Up-regulated	-1.718	1	Unchanged
ENSG00000197182	MIRLET7BHG	lncRNA	1.63123	6.18615e-05	Up-regulated	0.384379	1	Unchanged
ENSG00000197261	C6orf141	protein_coding	1.38073	0.0160428	Up-regulated	0.434509	1	Unchanged
ENSG00000197921	HES5	protein_coding	2.76789	0.000213907	Up-regulated	0.75718	1	Unchanged
ENSG00000198358	ENSG00000198358	lncRNA	5.51486	0.00270073	Up-regulated	1.10588	1	Unchanged
ENSG00000198744	MTCO3P12	unprocessed_pseudogene	6.18146	0.000568947	Up-regulated	0.231357	1	Unchanged
ENSG00000199172	MIR331	miRNA	1.65394	0.0228703	Up-regulated	0.887227	1	Unchanged
ENSG00000203877	RIPPLY2	protein_coding	1.39973	0.0399086	Up-regulated	0.808789	1	Unchanged
ENSG00000207563	MIR23B	miRNA	2.00239	7.50301e-06	Up-regulated	0.194741	1	Unchanged
ENSG00000207611	MIR149	miRNA	2.9619	0.0480661	Up-regulated	2.1625	1	Unchanged
ENSG00000207864	MIR27B	miRNA	2.65036	7.63463e-08	Up-regulated	0.479432	1	Unchanged
ENSG00000211829	TRDC	TR_C_gene	1.99223	0.0403167	Up-regulated	-1.03737	1	Unchanged
ENSG00000226167	AP4B1-AS1	lncRNA	1.22564	0.0416464	Up-regulated	0.4987	1	Unchanged
ENSG00000226278	PSPHP1	unprocessed_pseudogene	8.74908	0.000568947	Up-regulated	8.65338	2.11667e-07	Up-regulated
ENSG00000227292	ENSG00000227292	lncRNA	2.18993	0.0237885	Up-regulated	0.19667	1	Unchanged
ENSG00000229833	PET100	protein_coding	1.24179	0.0275314	Up-regulated	0.289914	1	Unchanged
ENSG00000230630	DNM3OS	lncRNA	1.11773	0.000139467	Up-regulated	0.325602	1	Unchanged
ENSG00000232044	SILC1	lncRNA	3.49523	0.00467269	Up-regulated	-1.00133	1	Unchanged
ENSG00000232821	ENSG00000232821	lncRNA	1.74305	0.0143241	Up-regulated	-0.192786	1	Unchanged
ENSG00000233327	USP32P2	transcribed_unprocessed_pseudogene	2.80169	2.34604e-05	Up-regulated	1.98505	0.841719	Unchanged
ENSG00000237289	CKMT1B	protein_coding	1.56454	0.0336908	Up-regulated	-0.187309	1	Unchanged
ENSG00000237512	UNC5B-AS1	lncRNA	1.2845	0.011752	Up-regulated	0.600075	1	Unchanged
ENSG00000244921	MTCYBP18	processed_pseudogene	4.08743	0.0183664	Up-regulated	-0.420061	1	Unchanged
ENSG00000249669	CARMN	lncRNA	1.28428	0.00759127	Up-regulated	0.762048	1	Unchanged
ENSG00000253476	ENSG00000253476	lncRNA	1.53731	0.0432521	Up-regulated	0.844814	1	Unchanged
ENSG00000256196	ENSG00000256196	lncRNA	2.49577	0.00199068	Up-regulated	0.970935	1	Unchanged
ENSG00000257859	CASC18	lncRNA	2.99125	0.00806315	Up-regulated	1.37804	1	Unchanged
ENSG00000258170	ENSG00000258170	lncRNA	3.54187	0.0055328	Up-regulated	-2.4189	1	Unchanged
ENSG00000258949	ENSG00000258949	lncRNA	1.1194	0.0294256	Up-regulated	0.571854	1	Unchanged
ENSG00000259370	ENSG00000259370	lncRNA	1.37824	0.0320239	Up-regulated	0.608822	1	Unchanged
ENSG00000260589	STAM-DT	lncRNA	1.72034	0.0354907	Up-regulated	0.304183	1	Unchanged
ENSG00000261096	ENSG00000261096	lncRNA	1.82857	1.60989e-05	Up-regulated	0.49267	1	Unchanged
ENSG00000264490	ENSG00000264490	lncRNA	1.6068	0.00940627	Up-regulated	1.37706	1	Unchanged
ENSG00000264932	ENSG00000264932	lncRNA	1.94974	0.0432521	Up-regulated	0.663718	1	Unchanged
ENSG00000267567	ENSG00000267567	lncRNA	2.94398	0.0459443	Up-regulated	2.92445	1	Unchanged
ENSG00000268403	ENSG00000268403	lncRNA	1.80357	0.00266105	Up-regulated	0.778822	1	Unchanged
ENSG00000269399	ENSG00000269399	lncRNA	1.28907	0.0140124	Up-regulated	0.176636	1	Unchanged
ENSG00000270933	ENSG00000270933	lncRNA	2.66443	0.00564677	Up-regulated	2.29405	1	Unchanged
ENSG00000271653	ENSG00000271653	lncRNA	2.10644	0.00530506	Up-regulated	0.712968	1	Unchanged
ENSG00000272864	ENSG00000272864	lncRNA	1.55177	0.0229383	Up-regulated	0.7831	1	Unchanged
ENSG00000272953	ENSG00000272953	lncRNA	2.48121	0.000944132	Up-regulated	1.67908	1	Unchanged
ENSG00000273759	ENSG00000273759	lncRNA	1.5281	0.00100764	Up-regulated	1.11945	1	Unchanged
ENSG00000276365	MIR145	miRNA	1.8099	0.00766913	Up-regulated	0.671341	1	Unchanged
ENSG00000276850	ENSG00000276850	lncRNA	2.55853	0.0328718	Up-regulated	-1.23222	1	Unchanged
ENSG00000277152	ENSG00000277152	lncRNA	1.487	0.0214184	Up-regulated	0.867042	1	Unchanged
ENSG00000280670	CCDC163	protein_coding	1.32213	0.0466096	Up-regulated	0.497752	1	Unchanged
ENSG00000283075	ENSG00000283075	lncRNA	2.38008	0.00730886	Up-regulated	2.51272	0.980284	Unchanged
ENSG00000284602	ENSG00000284602	lncRNA	1.52277	0.0221248	Up-regulated	0.708079	1	Unchanged
ENSG00000284820	ENSG00000284820	protein_coding	3.60814	0.00303344	Up-regulated	3.28169	0.331657	Unchanged
ENSG00000285416	ENSG00000285416	unitary_pseudogene	1.3167	0.0264685	Up-regulated	0.384119	1	Unchanged
ENSG00000285999	ENSG00000285999	lncRNA	2.12551	0.026947	Up-regulated	1.95679	0.671463	Unchanged
ENSG00000287431	RENO1	lncRNA	1.09064	0.0324618	Up-regulated	0.514961	1	Unchanged
ENSG00000288033	ENSG00000288033	lncRNA	1.50745	0.0237885	Up-regulated	1.2679	1	Unchanged
ENSG00000288781	ENSG00000288781	lncRNA	4.48328	0.0248219	Up-regulated	1.85784	1	Unchanged
ENSG00000288808	ENSG00000288808	lncRNA	1.64612	0.00433365	Up-regulated	0.82308	1	Unchanged
ENSG00000288896	ENSG00000288896	lncRNA	3.46048	0.0163304	Up-regulated	2.22109	1	Unchanged
ENSG00000289182	ENSG00000289182	lncRNA	1.95479	8.98271e-06	Up-regulated	1.84131	0.515195	Unchanged
ENSG00000289474	ENSG00000289474	lncRNA	5.74275	0.0163271	Up-regulated	2.15389	1	Unchanged
ENSG00000289913	ENSG00000289913	lncRNA	1.67647	0.0396919	Up-regulated	1.22263	1	Unchanged
ENSG00000290091	ENSG00000290091	lncRNA	1.92858	0.0489282	Up-regulated	1.12802	1	Unchanged
ENSG00000118898	PPL	protein_coding	-0.982263	0.0489282	Unchanged	-1.40106	0.000851961	Down-regulated
ENSG00000000005	TNMD	protein_coding	-2.0862	0.0406921	Down-regulated	-1.06585	1	Unchanged
ENSG00000000938	FGR	protein_coding	-1.04602	0.0331834	Down-regulated	-0.223417	1	Unchanged
ENSG00000004799	PDK4	protein_coding	-3.63401	4.46903e-10	Down-regulated	-0.40873	1	Unchanged
ENSG00000007908	SELE	protein_coding	-2.70867	0.0411856	Down-regulated	-0.105378	1	Unchanged
ENSG00000008516	MMP25	protein_coding	-2.01597	0.0084926	Down-regulated	-0.452567	1	Unchanged
ENSG00000010610	CD4	protein_coding	-1.1025	0.0130057	Down-regulated	-0.353252	1	Unchanged
ENSG00000018280	SLC11A1	protein_coding	-1.84042	0.0210691	Down-regulated	-0.4615	1	Unchanged
ENSG00000030304	MUSK	protein_coding	-1.25039	0.0377818	Down-regulated	-0.556671	1	Unchanged
ENSG00000047457	CP	protein_coding	-1.73018	0.0210558	Down-regulated	-0.542922	1	Unchanged
ENSG00000050730	TNIP3	protein_coding	-3.05067	0.0035152	Down-regulated	-0.72454	1	Unchanged
ENSG00000054598	FOXC1	protein_coding	-1.70817	0.00106795	Down-regulated	-0.280862	1	Unchanged
ENSG00000057657	PRDM1	protein_coding	-2.41183	6.35884e-11	Down-regulated	-0.61719	1	Unchanged
ENSG00000059377	TBXAS1	protein_coding	-1.10155	0.0298996	Down-regulated	-0.270905	1	Unchanged
ENSG00000059804	SLC2A3	protein_coding	-2.55409	7.31308e-10	Down-regulated	-0.474747	1	Unchanged
ENSG00000067082	KLF6	protein_coding	-1.13358	0.0055328	Down-regulated	-0.185005	1	Unchanged
ENSG00000072858	SIDT1	protein_coding	-1.36052	0.00276746	Down-regulated	-0.316745	1	Unchanged
ENSG00000075426	FOSL2	protein_coding	-1.79658	8.73901e-05	Down-regulated	-0.0121581	1	Unchanged
ENSG00000078589	P2RY10	protein_coding	-1.56965	0.0354907	Down-regulated	-0.541481	1	Unchanged
ENSG00000081041	CXCL2	protein_coding	-3.37023	1.67818e-06	Down-regulated	-0.419744	1	Unchanged
ENSG00000081320	STK17B	protein_coding	-1.80359	6.16425e-07	Down-regulated	-0.50944	1	Unchanged
ENSG00000086544	ITPKC	protein_coding	-1.51572	4.25691e-06	Down-regulated	-0.0442446	1	Unchanged
ENSG00000087074	PPP1R15A	protein_coding	-1.74288	0.000125381	Down-regulated	-0.462332	1	Unchanged
ENSG00000087589	CASS4	protein_coding	-1.54104	0.00726403	Down-regulated	-0.326457	1	Unchanged
ENSG00000089225	TBX5	protein_coding	-5.20688	0.015324	Down-regulated	-3.00441	1	Unchanged
ENSG00000090006	LTBP4	protein_coding	-1.18354	6.45562e-05	Down-regulated	-0.73329	0.553135	Unchanged
ENSG00000090104	RGS1	protein_coding	-5.22269	3.3097e-34	Down-regulated	-0.733307	1	Unchanged
ENSG00000096060	FKBP5	protein_coding	-1.38043	0.00564677	Down-regulated	0.104169	1	Unchanged
ENSG00000099860	GADD45B	protein_coding	-3.63114	3.25465e-16	Down-regulated	0.0360496	1	Unchanged
ENSG00000099985	OSM	protein_coding	-3.29308	0.00271901	Down-regulated	-0.208787	1	Unchanged
ENSG00000099998	GGT5	protein_coding	-1.20736	0.0034942	Down-regulated	-0.521572	1	Unchanged
ENSG00000100884	CPNE6	protein_coding	-1.25885	0.0321106	Down-regulated	-1.13687	1	Unchanged
ENSG00000100906	NFKBIA	protein_coding	-1.79933	2.348e-14	Down-regulated	-0.571862	1	Unchanged
ENSG00000101187	SLCO4A1	protein_coding	-1.62854	0.000350901	Down-regulated	-0.0150979	1	Unchanged
ENSG00000101230	ISM1	protein_coding	-1.1828	0.00933714	Down-regulated	-0.422595	1	Unchanged
ENSG00000101307	SIRPB1	protein_coding	-2.45017	0.0221248	Down-regulated	0.365463	1	Unchanged
ENSG00000102245	CD40LG	protein_coding	-1.61235	0.0206215	Down-regulated	-0.748959	1	Unchanged
ENSG00000103313	MEFV	protein_coding	-1.879	0.0144241	Down-regulated	-0.473695	1	Unchanged
ENSG00000105835	NAMPT	protein_coding	-1.56189	4.96766e-05	Down-regulated	0.0346816	1	Unchanged
ENSG00000106366	SERPINE1	protein_coding	-2.54828	0.00134171	Down-regulated	0.520311	1	Unchanged
ENSG00000107372	ZFAND5	protein_coding	-1.43716	4.25691e-06	Down-regulated	-0.399968	1	Unchanged
ENSG00000108342	CSF3	protein_coding	-4.52696	0.0106855	Down-regulated	-0.218156	1	Unchanged
ENSG00000108551	RASD1	protein_coding	-4.01862	1.17772e-35	Down-regulated	-0.91795	1	Unchanged
ENSG00000109321	AREG	protein_coding	-5.44003	1.16229e-07	Down-regulated	-0.988649	1	Unchanged
ENSG00000110203	FOLR3	protein_coding	-5.15115	0.000596054	Down-regulated	-1.1337	1	Unchanged
ENSG00000110848	CD69	protein_coding	-4.71596	3.93531e-19	Down-regulated	-1.73928	0.119192	Unchanged
ENSG00000111696	NT5DC3	protein_coding	-1.08859	0.0396919	Down-regulated	-0.146817	1	Unchanged
ENSG00000111859	NEDD9	protein_coding	-2.07677	1.25136e-12	Down-regulated	-0.463812	1	Unchanged
ENSG00000112214	FHL5	protein_coding	-1.29758	0.00877607	Down-regulated	-0.392126	1	Unchanged
ENSG00000112245	PTP4A1	protein_coding	-1.6924	0.018941	Down-regulated	-0.528294	1	Unchanged
ENSG00000112303	VNN2	protein_coding	-2.08244	0.0119017	Down-regulated	-0.164439	1	Unchanged
ENSG00000113070	HBEGF	protein_coding	-1.51753	4.53702e-08	Down-regulated	-0.175171	1	Unchanged
ENSG00000113263	ITK	protein_coding	-2.01603	0.00530506	Down-regulated	-0.483526	1	Unchanged
ENSG00000113916	BCL6	protein_coding	-1.21667	4.23473e-06	Down-regulated	0.046556	1	Unchanged
ENSG00000115165	CYTIP	protein_coding	-2.39229	2.3687e-06	Down-regulated	-0.655087	1	Unchanged
ENSG00000115590	IL1R2	protein_coding	-2.32136	0.00502187	Down-regulated	-0.666477	1	Unchanged
ENSG00000115602	IL1RL1	protein_coding	-2.90948	0.00136943	Down-regulated	-0.565913	1	Unchanged
ENSG00000117479	SLC19A2	protein_coding	-1.81202	6.97494e-07	Down-regulated	-0.185992	1	Unchanged
ENSG00000117525	F3	protein_coding	-2.27193	1.79952e-06	Down-regulated	0.166423	1	Unchanged
ENSG00000118503	TNFAIP3	protein_coding	-2.19478	1.28254e-13	Down-regulated	-0.601196	1	Unchanged
ENSG00000118515	SGK1	protein_coding	-2.42905	1.69494e-22	Down-regulated	-0.643064	0.553135	Unchanged
ENSG00000118523	CCN2	protein_coding	-2.39426	1.47657e-11	Down-regulated	-0.677088	1	Unchanged
ENSG00000119138	KLF9	protein_coding	-1.86269	6.92712e-17	Down-regulated	-0.206107	1	Unchanged
ENSG00000119535	CSF3R	protein_coding	-2.15681	0.000526485	Down-regulated	-0.244229	1	Unchanged
ENSG00000119986	AVPI1	protein_coding	-1.27807	0.0480661	Down-regulated	-0.522473	1	Unchanged
ENSG00000120129	DUSP1	protein_coding	-4.06164	5.01081e-25	Down-regulated	-0.859548	0.933659	Unchanged
ENSG00000120332	TNN	protein_coding	-1.68711	0.0154024	Down-regulated	-0.269037	1	Unchanged
ENSG00000120738	EGR1	protein_coding	-2.92608	0.000392	Down-regulated	-0.561672	1	Unchanged
ENSG00000120833	SOCS2	protein_coding	-1.01521	0.0010533	Down-regulated	0.0164093	1	Unchanged
ENSG00000121966	CXCR4	protein_coding	-3.69362	1.70197e-42	Down-regulated	-0.736147	1	Unchanged
ENSG00000122862	SRGN	protein_coding	-1.866	5.99507e-06	Down-regulated	-0.444896	1	Unchanged
ENSG00000122877	EGR2	protein_coding	-1.992	0.0297048	Down-regulated	-0.466612	1	Unchanged
ENSG00000123342	MMP19	protein_coding	-2.9231	0.000184628	Down-regulated	-1.24803	1	Unchanged
ENSG00000123358	NR4A1	protein_coding	-2.59212	0.0209127	Down-regulated	-0.732754	1	Unchanged
ENSG00000124102	PI3	protein_coding	-4.24952	0.00444957	Down-regulated	-0.36728	1	Unchanged
ENSG00000124731	TREM1	protein_coding	-3.58959	0.00104093	Down-regulated	-0.147045	1	Unchanged
ENSG00000124762	CDKN1A	protein_coding	-3.05988	9.19791e-10	Down-regulated	0.472233	1	Unchanged
ENSG00000124882	EREG	protein_coding	-3.10877	0.0396591	Down-regulated	-0.0887315	1	Unchanged
ENSG00000125089	SH3TC1	protein_coding	-1.18685	0.00564677	Down-regulated	-0.197129	1	Unchanged
ENSG00000125657	TNFSF9	protein_coding	-2.25468	0.0143241	Down-regulated	-0.35641	1	Unchanged
ENSG00000125740	FOSB	protein_coding	-4.36242	0.000336818	Down-regulated	-0.483424	1	Unchanged
ENSG00000125845	BMP2	protein_coding	-2.00604	4.34984e-10	Down-regulated	-0.603186	1	Unchanged
ENSG00000127241	MASP1	protein_coding	-1.11894	0.00493207	Down-regulated	-0.0959294	1	Unchanged
ENSG00000127528	KLF2	protein_coding	-2.7368	1.63612e-22	Down-regulated	-1.06787	0.666752	Unchanged
ENSG00000127533	F2RL3	protein_coding	-3.58325	1.89478e-13	Down-regulated	-0.894334	1	Unchanged
ENSG00000128016	ZFP36	protein_coding	-4.22945	9.32062e-15	Down-regulated	-0.586789	1	Unchanged
ENSG00000128815	WDFY4	protein_coding	-1.26951	0.0267429	Down-regulated	-0.49161	1	Unchanged
ENSG00000129654	FOXJ1	protein_coding	-2.50591	0.014459	Down-regulated	0.526493	1	Unchanged
ENSG00000130037	KCNA5	protein_coding	-2.15201	3.19568e-09	Down-regulated	-0.156019	1	Unchanged
ENSG00000130222	GADD45G	protein_coding	-3.23369	2.03865e-26	Down-regulated	-0.822015	1	Unchanged
ENSG00000130522	JUND	protein_coding	-1.49948	3.01425e-06	Down-regulated	-0.439247	1	Unchanged
ENSG00000130775	THEMIS2	protein_coding	-1.76135	4.16441e-06	Down-regulated	-0.195023	1	Unchanged
ENSG00000131355	ADGRE3	protein_coding	-2.66403	0.0213992	Down-regulated	-0.127724	1	Unchanged
ENSG00000131386	GALNT15	protein_coding	-1.41079	0.0257335	Down-regulated	-0.360378	1	Unchanged
ENSG00000133874	RNF122	protein_coding	-1.94643	0.000294512	Down-regulated	-0.0121249	1	Unchanged
ENSG00000134107	BHLHE40	protein_coding	-1.43204	0.00545008	Down-regulated	0.0882566	1	Unchanged
ENSG00000134531	EMP1	protein_coding	-1.6089	0.00599794	Down-regulated	-0.64255	1	Unchanged
ENSG00000134830	C5AR2	protein_coding	-1.68603	0.0132852	Down-regulated	-0.565789	1	Unchanged
ENSG00000135245	HILPDA	protein_coding	-1.15427	0.000458084	Down-regulated	-0.370518	1	Unchanged
ENSG00000135678	CPM	protein_coding	-1.32296	2.91247e-06	Down-regulated	-0.55279	1	Unchanged
ENSG00000135821	GLUL	protein_coding	-1.45173	1.85511e-08	Down-regulated	-0.312876	1	Unchanged
ENSG00000136244	IL6	protein_coding	-4.17327	1.44233e-06	Down-regulated	-0.468228	1	Unchanged
ENSG00000136634	IL10	protein_coding	-2.34993	0.000183437	Down-regulated	-0.723201	1	Unchanged
ENSG00000136826	KLF4	protein_coding	-3.05806	3.62427e-24	Down-regulated	-0.885512	1	Unchanged
ENSG00000136997	MYC	protein_coding	-3.18997	1.10378e-16	Down-regulated	-0.0219461	1	Unchanged
ENSG00000137491	SLCO2B1	protein_coding	-1.08634	0.00288098	Down-regulated	-0.222819	1	Unchanged
ENSG00000137878	GCOM1	protein_coding	-2.01444	1.10882e-05	Down-regulated	0.13332	1	Unchanged
ENSG00000138135	CH25H	protein_coding	-4.30556	1.66213e-18	Down-regulated	-0.953126	1	Unchanged
ENSG00000138166	DUSP5	protein_coding	-1.7345	6.53599e-06	Down-regulated	0.332566	1	Unchanged
ENSG00000138615	CILP	protein_coding	-1.72993	0.00187045	Down-regulated	-0.439186	1	Unchanged
ENSG00000138669	PRKG2	protein_coding	-2.10493	0.047956	Down-regulated	0.13065	1	Unchanged
ENSG00000139289	PHLDA1	protein_coding	-2.36564	3.11894e-20	Down-regulated	-0.556128	1	Unchanged
ENSG00000139318	DUSP6	protein_coding	-1.26125	2.21207e-07	Down-regulated	-0.458751	1	Unchanged
ENSG00000139946	PELI2	protein_coding	-1.02653	0.00202304	Down-regulated	-0.707933	1	Unchanged
ENSG00000140932	CMTM2	protein_coding	-3.24442	0.000175588	Down-regulated	-0.744581	1	Unchanged
ENSG00000142178	SIK1	protein_coding	-4.16534	0.0287002	Down-regulated	-1.10586	1	Unchanged
ENSG00000142512	SIGLEC10	protein_coding	-1.98847	0.0109782	Down-regulated	-0.203354	1	Unchanged
ENSG00000142871	CCN1	protein_coding	-2.31017	1.15768e-08	Down-regulated	-0.571693	1	Unchanged
ENSG00000143333	RGS16	protein_coding	-2.04138	0.00111136	Down-regulated	-0.061713	1	Unchanged
ENSG00000143384	MCL1	protein_coding	-1.33219	3.17271e-07	Down-regulated	-0.270285	1	Unchanged
ENSG00000143546	S100A8	protein_coding	-3.1491	0.0116592	Down-regulated	-0.294955	1	Unchanged
ENSG00000143878	RHOB	protein_coding	-1.25141	3.19568e-09	Down-regulated	-0.275747	1	Unchanged
ENSG00000144229	THSD7B	protein_coding	-1.81901	0.0298366	Down-regulated	-0.0910471	1	Unchanged
ENSG00000144655	CSRNP1	protein_coding	-3.5253	1.56086e-14	Down-regulated	-0.408188	1	Unchanged
ENSG00000144802	NFKBIZ	protein_coding	-1.36112	0.00181313	Down-regulated	-0.379257	1	Unchanged
ENSG00000145283	SLC10A6	protein_coding	-1.66441	0.032577	Down-regulated	-0.883834	1	Unchanged
ENSG00000146278	PNRC1	protein_coding	-1.05083	4.88183e-08	Down-regulated	-0.193823	1	Unchanged
ENSG00000148339	SLC25A25	protein_coding	-1.55481	0.00262963	Down-regulated	-0.0838251	1	Unchanged
ENSG00000149295	DRD2	protein_coding	-1.79222	0.0203677	Down-regulated	-0.797571	1	Unchanged
ENSG00000151929	BAG3	protein_coding	-1.02338	0.00467043	Down-regulated	0.196704	1	Unchanged
ENSG00000152463	OLAH	protein_coding	-4.19693	0.018941	Down-regulated	-1.00453	1	Unchanged
ENSG00000152518	ZFP36L2	protein_coding	-1.03273	0.00122113	Down-regulated	-0.622063	1	Unchanged
ENSG00000153234	NR4A2	protein_coding	-2.81046	8.78938e-06	Down-regulated	-1.00046	1	Unchanged
ENSG00000153283	CD96	protein_coding	-1.49442	0.048365	Down-regulated	-0.734332	1	Unchanged
ENSG00000154198	CYP4Z2P	transcribed_unprocessed_pseudogene	-2.95553	0.0163304	Down-regulated	0.194986	1	Unchanged
ENSG00000154734	ADAMTS1	protein_coding	-2.34536	1.94096e-22	Down-regulated	-0.652428	1	Unchanged
ENSG00000155090	KLF10	protein_coding	-1.08281	0.0113935	Down-regulated	0.145245	1	Unchanged
ENSG00000155926	SLA	protein_coding	-2.06517	4.47082e-06	Down-regulated	-0.533828	1	Unchanged
ENSG00000157514	TSC22D3	protein_coding	-1.9478	2.18601e-14	Down-regulated	-0.413752	1	Unchanged
ENSG00000157557	ETS2	protein_coding	-1.02543	0.000167729	Down-regulated	0.171316	1	Unchanged
ENSG00000158022	TRIM63	protein_coding	-2.77258	0.0331736	Down-regulated	-1.18252	1	Unchanged
ENSG00000158050	DUSP2	protein_coding	-3.33214	8.00996e-09	Down-regulated	-0.300431	1	Unchanged
ENSG00000158246	TENT5B	protein_coding	-1.18399	0.0377818	Down-regulated	0.0512907	1	Unchanged
ENSG00000158859	ADAMTS4	protein_coding	-3.88276	1.76992e-07	Down-regulated	0.319943	1	Unchanged
ENSG00000159167	STC1	protein_coding	-2.2364	0.000229658	Down-regulated	-0.380117	1	Unchanged
ENSG00000159388	BTG2	protein_coding	-3.40625	8.35285e-08	Down-regulated	-0.546949	1	Unchanged
ENSG00000160888	IER2	protein_coding	-1.6752	7.12525e-06	Down-regulated	-0.446907	1	Unchanged
ENSG00000161835	TAMALIN	protein_coding	-1.57764	7.71739e-12	Down-regulated	-0.408221	1	Unchanged
ENSG00000161896	IP6K3	protein_coding	-1.58685	0.0165786	Down-regulated	-0.00729363	1	Unchanged
ENSG00000162676	GFI1	protein_coding	-1.5136	0.0237132	Down-regulated	-0.688425	1	Unchanged
ENSG00000162711	NLRP3	protein_coding	-2.0612	0.00126334	Down-regulated	-0.729069	1	Unchanged
ENSG00000162739	SLAMF6	protein_coding	-1.682	0.0105319	Down-regulated	-0.375273	1	Unchanged
ENSG00000162772	ATF3	protein_coding	-2.89274	0.0101931	Down-regulated	0.0576378	1	Unchanged
ENSG00000162783	IER5	protein_coding	-1.34384	8.98271e-06	Down-regulated	-0.0571006	1	Unchanged
ENSG00000163083	INHBB	protein_coding	-2.04319	1.03409e-05	Down-regulated	0.463214	1	Unchanged
ENSG00000163220	S100A9	protein_coding	-2.869	0.0229433	Down-regulated	-0.167809	1	Unchanged
ENSG00000163221	S100A12	protein_coding	-3.20498	0.0289715	Down-regulated	-0.278476	1	Unchanged
ENSG00000163285	GABRG1	protein_coding	-4.21433	0.0142772	Down-regulated	-2.81118	1	Unchanged
ENSG00000163394	CCKAR	protein_coding	-2.34301	0.00675932	Down-regulated	-0.739225	1	Unchanged
ENSG00000163464	CXCR1	protein_coding	-3.38174	0.0173103	Down-regulated	-0.561921	1	Unchanged
ENSG00000163492	CCDC141	protein_coding	-1.66419	0.0321217	Down-regulated	-0.912896	1	Unchanged
ENSG00000163599	CTLA4	protein_coding	-3.1692	1.67643e-05	Down-regulated	-0.492842	1	Unchanged
ENSG00000163659	TIPARP	protein_coding	-2.19526	1.80235e-07	Down-regulated	0.229375	1	Unchanged
ENSG00000163884	KLF15	protein_coding	-2.37343	2.2701e-05	Down-regulated	-0.62165	1	Unchanged
ENSG00000164056	SPRY1	protein_coding	-1.07646	7.16361e-05	Down-regulated	-0.474352	1	Unchanged
ENSG00000164379	FOXQ1	protein_coding	-1.40506	0.0298996	Down-regulated	-0.50092	1	Unchanged
ENSG00000164442	CITED2	protein_coding	-2.29813	6.36982e-19	Down-regulated	-1.26067	0.00596008	Down-regulated
ENSG00000164694	FNDC1	protein_coding	-1.84997	0.00254656	Down-regulated	0.0988888	1	Unchanged
ENSG00000164736	SOX17	protein_coding	-3.00552	2.91809e-17	Down-regulated	-0.416475	1	Unchanged
ENSG00000164949	GEM	protein_coding	-1.62053	0.00305495	Down-regulated	-0.335122	1	Unchanged
ENSG00000165507	DEPP1	protein_coding	-1.99249	3.70951e-05	Down-regulated	-0.650963	1	Unchanged
ENSG00000166148	AVPR1A	protein_coding	-2.06413	3.55351e-07	Down-regulated	-0.531305	1	Unchanged
ENSG00000166292	TMEM100	protein_coding	-1.00812	2.93273e-05	Down-regulated	-0.215545	1	Unchanged
ENSG00000166523	CLEC4E	protein_coding	-3.32001	1.11804e-09	Down-regulated	-0.443254	1	Unchanged
ENSG00000166741	NNMT	protein_coding	-1.605	0.00122139	Down-regulated	-0.221277	1	Unchanged
ENSG00000168209	DDIT4	protein_coding	-3.01115	7.1625e-11	Down-regulated	-0.841744	1	Unchanged
ENSG00000168309	FAM107A	protein_coding	-1.91124	5.00401e-10	Down-regulated	-0.595132	1	Unchanged
ENSG00000168421	RHOH	protein_coding	-2.6961	8.83731e-06	Down-regulated	-1.10151	1	Unchanged
ENSG00000168477	TNXB	protein_coding	-1.18637	0.0475087	Down-regulated	-0.786391	1	Unchanged
ENSG00000168685	IL7R	protein_coding	-2.9681	1.03657e-06	Down-regulated	-0.643638	1	Unchanged
ENSG00000169252	ADRB2	protein_coding	-1.00171	0.00350406	Down-regulated	0.0188757	1	Unchanged
ENSG00000170345	FOS	protein_coding	-4.71657	5.46843e-11	Down-regulated	-1.11915	0.841719	Unchanged
ENSG00000170956	CEACAM3	protein_coding	-2.68325	0.0446324	Down-regulated	-0.853962	1	Unchanged
ENSG00000170989	S1PR1	protein_coding	-1.39264	8.93605e-05	Down-regulated	-0.46993	1	Unchanged
ENSG00000171049	FPR2	protein_coding	-3.41773	0.00516899	Down-regulated	-0.38155	1	Unchanged
ENSG00000171051	FPR1	protein_coding	-2.82812	3.35855e-05	Down-regulated	-0.453612	1	Unchanged
ENSG00000171223	JUNB	protein_coding	-3.55453	8.45467e-16	Down-regulated	-0.683745	1	Unchanged
ENSG00000171509	RXFP1	protein_coding	-3.7804	0.0294256	Down-regulated	-2.36008	1	Unchanged
ENSG00000172215	CXCR6	protein_coding	-1.26962	0.0281686	Down-regulated	-0.456079	1	Unchanged
ENSG00000172216	CEBPB	protein_coding	-2.26394	2.72005e-12	Down-regulated	-0.323299	1	Unchanged
ENSG00000172602	RND1	protein_coding	-3.03224	0.000305813	Down-regulated	0.0121	1	Unchanged
ENSG00000173334	TRIB1	protein_coding	-1.58283	0.00192382	Down-regulated	-0.00246283	1	Unchanged
ENSG00000173432	SAA1	protein_coding	-3.72721	0.0489282	Down-regulated	-2.87535	0.948755	Unchanged
ENSG00000174429	ABRA	protein_coding	-2.15601	0.043796	Down-regulated	-0.641622	1	Unchanged
ENSG00000174885	NLRP6	protein_coding	-3.62995	1.16058e-06	Down-regulated	-0.33276	1	Unchanged
ENSG00000176907	TCIM	protein_coding	-1.38942	1.12805e-07	Down-regulated	-0.265273	1	Unchanged
ENSG00000177464	GPR4	protein_coding	-1.48799	0.00458042	Down-regulated	0.279231	1	Unchanged
ENSG00000177535	OR2B11	protein_coding	-2.23085	0.0221248	Down-regulated	-1.06922	1	Unchanged
ENSG00000177575	CD163	protein_coding	-1.43222	0.0128015	Down-regulated	-0.380019	1	Unchanged
ENSG00000177606	JUN	protein_coding	-2.41109	3.85205e-07	Down-regulated	-0.628772	1	Unchanged
ENSG00000178726	THBD	protein_coding	-1.82166	1.15768e-08	Down-regulated	-0.289604	1	Unchanged
ENSG00000178878	APOLD1	protein_coding	-4.40363	8.0359e-41	Down-regulated	-0.673159	1	Unchanged
ENSG00000179094	PER1	protein_coding	-2.33232	1.77983e-15	Down-regulated	-0.375094	1	Unchanged
ENSG00000179344	HLA-DQB1	protein_coding	-1.49037	0.0405595	Down-regulated	-0.430071	1	Unchanged
ENSG00000179428	IL6-AS1	lncRNA	-3.1944	0.000179385	Down-regulated	-0.6493	1	Unchanged
ENSG00000180353	HCLS1	protein_coding	-1.01192	0.0215473	Down-regulated	-0.35745	1	Unchanged
ENSG00000180871	CXCR2	protein_coding	-3.37023	0.000496176	Down-regulated	-0.513108	1	Unchanged
ENSG00000181631	P2RY13	protein_coding	-1.25901	0.0437068	Down-regulated	-0.324251	1	Unchanged
ENSG00000181773	GPR3	protein_coding	-2.33019	0.00794206	Down-regulated	0.53758	1	Unchanged
ENSG00000183072	NKX2-5	protein_coding	-4.97862	0.0146378	Down-regulated	-0.690365	1	Unchanged
ENSG00000183864	TOB2	protein_coding	-1.0673	7.10693e-06	Down-regulated	-0.0655559	1	Unchanged
ENSG00000184205	TSPYL2	protein_coding	-1.1027	0.000579355	Down-regulated	-0.0499539	1	Unchanged
ENSG00000184557	SOCS3	protein_coding	-4.13274	6.16425e-07	Down-regulated	-0.221377	1	Unchanged
ENSG00000185022	MAFF	protein_coding	-2.28042	0.000158888	Down-regulated	0.105243	1	Unchanged
ENSG00000186431	FCAR	protein_coding	-3.36391	0.00194136	Down-regulated	-0.351971	1	Unchanged
ENSG00000188042	ARL4C	protein_coding	-1.18318	0.020025	Down-regulated	-0.411027	1	Unchanged
ENSG00000188050	RNF133	protein_coding	-3.52578	0.00636524	Down-regulated	-0.859855	1	Unchanged
ENSG00000188305	PEAK3	protein_coding	-1.62602	0.00737006	Down-regulated	-0.515778	1	Unchanged
ENSG00000188404	SELL	protein_coding	-2.16203	0.00253089	Down-regulated	-0.228431	1	Unchanged
ENSG00000188996	HUS1B	protein_coding	-2.7899	0.000157007	Down-regulated	-0.70245	1	Unchanged
ENSG00000196136	SERPINA3	protein_coding	-4.04234	1.3701e-05	Down-regulated	0.0309831	1	Unchanged
ENSG00000196208	GREB1	protein_coding	-1.45911	0.0012207	Down-regulated	-1.09142	0.671463	Unchanged
ENSG00000196735	HLA-DQA1	protein_coding	-1.07693	0.00598496	Down-regulated	-0.193476	1	Unchanged
ENSG00000197405	C5AR1	protein_coding	-1.86203	3.17271e-07	Down-regulated	-0.231907	1	Unchanged
ENSG00000198570	RD3	protein_coding	-4.67567	0.000196328	Down-regulated	-0.816774	1	Unchanged
ENSG00000198805	PNP	protein_coding	-1.46925	0.00579643	Down-regulated	-0.15301	1	Unchanged
ENSG00000198851	CD3E	protein_coding	-1.4237	0.0103832	Down-regulated	-0.509226	1	Unchanged
ENSG00000199477	SNORA31	snoRNA	-1.88723	0.0210691	Down-regulated	-0.283179	1	Unchanged
ENSG00000200389	RNU6-509P	snRNA	-4.01941	0.0163304	Down-regulated	-2.11831	1	Unchanged
ENSG00000202017	RNU6-806P	snRNA	-3.84031	0.0159511	Down-regulated	-2.71769	0.813163	Unchanged
ENSG00000202318	Y_RNA	misc_RNA	-1.7572	0.0160021	Down-regulated	-0.409939	1	Unchanged
ENSG00000203392	ENSG00000203392	lncRNA	-1.33809	0.0315763	Down-regulated	-0.0528419	1	Unchanged
ENSG00000203865	ATP1A1-AS1	lncRNA	-1.76657	1.41154e-07	Down-regulated	-0.280019	1	Unchanged
ENSG00000204020	LIPN	protein_coding	-2.65174	0.0340632	Down-regulated	0.00865524	1	Unchanged
ENSG00000204086	RPA4	protein_coding	-1.96428	0.0258384	Down-regulated	-0.992061	1	Unchanged
ENSG00000204103	MAFB	protein_coding	-1.4436	0.00347564	Down-regulated	-0.706985	1	Unchanged
ENSG00000204388	HSPA1B	protein_coding	-1.37868	1.47859e-09	Down-regulated	0.650196	1	Unchanged
ENSG00000205221	VIT	protein_coding	-1.14953	0.0163304	Down-regulated	-0.700145	1	Unchanged
ENSG00000205336	ADGRG1	protein_coding	-1.01992	0.0103832	Down-regulated	0.00440849	1	Unchanged
ENSG00000205362	MT1A	protein_coding	-2.76425	0.000154337	Down-regulated	-0.239639	1	Unchanged
ENSG00000205502	C2CD4B	protein_coding	-4.16842	3.17271e-07	Down-regulated	-0.503661	1	Unchanged
ENSG00000205622	ENSG00000205622	lncRNA	-2.13331	0.00649349	Down-regulated	-0.0356137	1	Unchanged
ENSG00000207258	Y_RNA	misc_RNA	-3.88593	4.02777e-09	Down-regulated	-1.15454	1	Unchanged
ENSG00000207327	RNU6-883P	snRNA	-3.05806	0.0425073	Down-regulated	-0.618578	1	Unchanged
ENSG00000212443	SNORA53	snoRNA	-1.71131	0.00347564	Down-regulated	-0.167519	1	Unchanged
ENSG00000215270	TOMM40P2	processed_pseudogene	-4.19868	0.0142772	Down-regulated	-0.532528	1	Unchanged
ENSG00000218749	ENSG00000218749	processed_pseudogene	-4.4454	8.73901e-05	Down-regulated	-0.310081	1	Unchanged
ENSG00000220884	MESTP1	processed_pseudogene	-4.28638	2.06845e-05	Down-regulated	-0.463571	1	Unchanged
ENSG00000221869	CEBPD	protein_coding	-3.8579	4.39184e-30	Down-regulated	-0.562316	1	Unchanged
ENSG00000224397	PELATON	lncRNA	-2.41068	0.0475087	Down-regulated	-0.799484	1	Unchanged
ENSG00000224689	ZNF812P	transcribed_unprocessed_pseudogene	-2.69014	3.61244e-05	Down-regulated	-0.30546	1	Unchanged
ENSG00000224982	TMEM233	protein_coding	-1.47699	0.0354907	Down-regulated	-0.750273	1	Unchanged
ENSG00000225434	LINC01504	lncRNA	-3.37396	1.59628e-11	Down-regulated	-0.660725	1	Unchanged
ENSG00000225873	C3orf86	transcribed_unitary_pseudogene	-2.31543	0.0237885	Down-regulated	-0.294262	1	Unchanged
ENSG00000225971	RPS3AP51	processed_pseudogene	-2.50139	0.021859	Down-regulated	-1.27011	1	Unchanged
ENSG00000225976	CKS1BP2	processed_pseudogene	-3.11974	0.0372177	Down-regulated	-0.455577	1	Unchanged
ENSG00000226957	ENSG00000226957	lncRNA	-1.93249	0.015308	Down-regulated	-0.187024	1	Unchanged
ENSG00000227183	HDGFP1	processed_pseudogene	-4.71756	0.0287933	Down-regulated	0.182605	1	Unchanged
ENSG00000228261	ITPRIP-AS1	lncRNA	-3.04554	0.00216737	Down-regulated	-0.480959	1	Unchanged
ENSG00000228513	ENSG00000228513	processed_pseudogene	-2.64177	0.0221248	Down-regulated	-0.538596	1	Unchanged
ENSG00000228804	ENSG00000228804	lncRNA	-2.34147	0.00187045	Down-regulated	-0.0104534	1	Unchanged
ENSG00000229367	HMGN2P19	processed_pseudogene	-2.60464	0.048374	Down-regulated	0.346946	1	Unchanged
ENSG00000229951	FOSL2-AS1	lncRNA	-1.99379	6.46324e-06	Down-regulated	-0.383624	1	Unchanged
ENSG00000230470	ENSG00000230470	lncRNA	-2.5879	0.00467269	Down-regulated	-1.02472	1	Unchanged
ENSG00000230587	LINC02580	lncRNA	-1.45229	0.0110593	Down-regulated	-0.441483	1	Unchanged
ENSG00000231507	LINC01353	lncRNA	-2.18471	0.00253089	Down-regulated	-0.0638878	1	Unchanged
ENSG00000232057	ENSG00000232057	lncRNA	-2.30131	0.00148521	Down-regulated	-0.74215	1	Unchanged
ENSG00000232891	ENSG00000232891	lncRNA	-3.10901	0.0442188	Down-regulated	-0.264568	1	Unchanged
ENSG00000233791	BTG2-DT	lncRNA	-3.10912	4.36395e-05	Down-regulated	-0.799563	1	Unchanged
ENSG00000236674	ENSG00000236674	processed_pseudogene	-3.83259	0.0389281	Down-regulated	-2.70296	0.940217	Unchanged
ENSG00000237989	LINC01679	lncRNA	-1.70822	0.000196328	Down-regulated	-0.288178	1	Unchanged
ENSG00000239570	SETP11	processed_pseudogene	-2.07442	0.0227139	Down-regulated	-0.242105	1	Unchanged
ENSG00000242113	RN7SL124P	misc_RNA	-3.1265	0.0320239	Down-regulated	-0.488809	1	Unchanged
ENSG00000243384	ENSG00000243384	lncRNA	-3.94622	4.42304e-05	Down-regulated	-0.63585	1	Unchanged
ENSG00000244953	ENSG00000244953	lncRNA	-2.43509	0.00167922	Down-regulated	-0.165296	1	Unchanged
ENSG00000248773	ENSG00000248773	lncRNA	-1.60869	0.0464046	Down-regulated	-0.184231	1	Unchanged
ENSG00000251596	HADHAP1	processed_pseudogene	-2.13837	0.0312279	Down-regulated	-0.934172	1	Unchanged
ENSG00000255112	CHMP1B	protein_coding	-1.06226	0.000733984	Down-regulated	-0.0439126	1	Unchanged
ENSG00000255967	HADHAP2	processed_pseudogene	-1.71857	0.0055993	Down-regulated	-0.849135	1	Unchanged
ENSG00000255986	MT1JP	transcribed_unprocessed_pseudogene	-3.7366	0.000822103	Down-regulated	-0.869522	1	Unchanged
ENSG00000256006	ENSG00000256006	lncRNA	-2.64687	0.00100139	Down-regulated	-0.370684	1	Unchanged
ENSG00000256609	ENSG00000256609	lncRNA	-2.4522	0.00432913	Down-regulated	-0.399519	1	Unchanged
ENSG00000256947	ENSG00000256947	lncRNA	-2.29802	0.0482034	Down-regulated	-0.325267	1	Unchanged
ENSG00000257335	MGAM	protein_coding	-2.2483	0.0439802	Down-regulated	-0.283703	1	Unchanged
ENSG00000258469	CHMP4BP1	processed_pseudogene	-1.97215	0.000157039	Down-regulated	-0.413458	1	Unchanged
ENSG00000258788	CKS1BP1	processed_pseudogene	-2.39421	0.000317152	Down-regulated	-0.200941	1	Unchanged
ENSG00000258819	LINC02289	lncRNA	-1.37295	0.0274174	Down-regulated	-0.450455	1	Unchanged
ENSG00000259884	NR4A1AS	lncRNA	-3.70715	1.85702e-06	Down-regulated	-1.04457	1	Unchanged
ENSG00000260859	ENSG00000260859	lncRNA	-1.87061	0.0163304	Down-regulated	-0.564894	1	Unchanged
ENSG00000261158	ENSG00000261158	lncRNA	-3.57232	0.00912186	Down-regulated	-1.69339	1	Unchanged
ENSG00000264483	MIR5008	miRNA	-2.62408	0.0143241	Down-regulated	0.04818	1	Unchanged
ENSG00000264573	RN7SL15P	misc_RNA	-3.03791	0.000147971	Down-regulated	-0.285118	1	Unchanged
ENSG00000265179	ENSG00000265179	lncRNA	-1.743	0.00563295	Down-regulated	-0.698976	1	Unchanged
ENSG00000265527	MIR5690	miRNA	-3.88469	5.15945e-06	Down-regulated	-0.51717	1	Unchanged
ENSG00000265625	ENSG00000265625	lncRNA	-2.15273	0.00266105	Down-regulated	-0.340626	1	Unchanged
ENSG00000267519	MIR23AHG	lncRNA	-2.30001	0.000607874	Down-regulated	-0.527536	1	Unchanged
ENSG00000267653	ENSG00000267653	lncRNA	-2.95706	0.00031112	Down-regulated	-0.425526	1	Unchanged
ENSG00000268883	PNMA6B	unprocessed_pseudogene	-2.3889	0.0264685	Down-regulated	-0.59589	1	Unchanged
ENSG00000270640	ENSG00000270640	lncRNA	-5.14132	2.63752e-16	Down-regulated	-0.587174	1	Unchanged
ENSG00000271503	CCL5	protein_coding	-1.26606	0.00443993	Down-regulated	-0.455564	1	Unchanged
ENSG00000272463	ENSG00000272463	lncRNA	-1.25535	0.0142772	Down-regulated	-0.0473979	1	Unchanged
ENSG00000272574	ENSG00000272574	lncRNA	-2.10422	0.0010084	Down-regulated	0.082955	1	Unchanged
ENSG00000274008	Metazoa_SRP	misc_RNA	-4.12453	7.10034e-10	Down-regulated	-0.291927	1	Unchanged
ENSG00000274736	CCL23	protein_coding	-1.66371	0.01525	Down-regulated	-0.770795	1	Unchanged
ENSG00000275302	CCL4	protein_coding	-3.747	2.70621e-13	Down-regulated	-1.1899	1	Unchanged
ENSG00000275993	ENSG00000275993	artifact	-3.96806	3.85951e-06	Down-regulated	-0.138627	1	Unchanged
ENSG00000276070	CCL4L2	protein_coding	-3.01055	8.83731e-06	Down-regulated	-1.0341	1	Unchanged
ENSG00000276107	THBS1-IT1	lncRNA	-2.39601	0.00317313	Down-regulated	0.483148	1	Unchanged
ENSG00000277587	ENSG00000277587	lncRNA	-2.3949	0.00401789	Down-regulated	-0.258748	1	Unchanged
ENSG00000277632	CCL3	protein_coding	-2.0402	0.00755726	Down-regulated	-0.72301	1	Unchanged
ENSG00000278965	ENSG00000278965	TEC	-3.07768	0.0055328	Down-regulated	-2.10982	0.83186	Unchanged
ENSG00000279384	ENSG00000279384	TEC	-2.06564	2.09626e-05	Down-regulated	0.105524	1	Unchanged
ENSG00000279526	ENSG00000279526	TEC	-2.05852	0.000222759	Down-regulated	-0.741244	1	Unchanged
ENSG00000279581	ENSG00000279581	TEC	-1.96665	0.011752	Down-regulated	-0.504427	1	Unchanged
ENSG00000279637	ENSG00000279637	TEC	-2.53801	0.000239009	Down-regulated	-1.00262	1	Unchanged
ENSG00000279940	ENSG00000279940	TEC	-3.75491	1.10253e-12	Down-regulated	-0.813137	1	Unchanged
ENSG00000279976	ENSG00000279976	TEC	-2.09421	0.000730865	Down-regulated	0.124492	1	Unchanged
ENSG00000280200	ENSG00000280200	TEC	-2.59009	1.06749e-05	Down-regulated	-0.0608277	1	Unchanged
ENSG00000280222	ENSG00000280222	TEC	-3.84484	2.83864e-06	Down-regulated	-0.968069	1	Unchanged
ENSG00000280323	ENSG00000280323	TEC	-1.14738	0.018941	Down-regulated	0.370647	1	Unchanged
ENSG00000282608	ADORA3	protein_coding	-1.94248	0.00433326	Down-regulated	-0.351527	1	Unchanged
ENSG00000283122	HYMAI	lncRNA	-1.57744	0.0410058	Down-regulated	0.148007	1	Unchanged
ENSG00000283761	ENSG00000283761	protein_coding	-1.89199	0.000697408	Down-regulated	0.47607	1	Unchanged
ENSG00000283849	ENSG00000283849	lncRNA	-3.9427	1.40209e-10	Down-regulated	-0.48984	1	Unchanged
ENSG00000284669	ENSG00000284669	lncRNA	-4.34116	9.86675e-11	Down-regulated	-0.858879	1	Unchanged
ENSG00000284730	TMDD1	protein_coding	-1.69327	0.0315763	Down-regulated	-0.0620107	1	Unchanged
ENSG00000285848	ENSG00000285848	lncRNA	-2.67264	0.000197159	Down-regulated	-0.401552	1	Unchanged
ENSG00000285938	ENSG00000285938	protein_coding	-1.767	0.0287933	Down-regulated	0.212749	1	Unchanged
ENSG00000286458	ENSG00000286458	lncRNA	-1.754	0.00317313	Down-regulated	-0.0394666	1	Unchanged
ENSG00000286463	ENSG00000286463	lncRNA	-2.97147	3.32186e-05	Down-regulated	-0.543041	1	Unchanged
ENSG00000286732	ENSG00000286732	lncRNA	-1.89051	0.0382932	Down-regulated	-0.639585	1	Unchanged
ENSG00000286735	ENSG00000286735	lncRNA	-1.78721	0.0327605	Down-regulated	-0.649592	1	Unchanged
ENSG00000286882	ENSG00000286882	lncRNA	-4.16162	0.000399958	Down-regulated	-0.844244	1	Unchanged
ENSG00000287166	ENSG00000287166	lncRNA	-3.13868	0.0399086	Down-regulated	-0.70493	1	Unchanged
ENSG00000287458	ENSG00000287458	lncRNA	-4.16984	1.15768e-08	Down-regulated	-0.172537	1	Unchanged
ENSG00000287652	ENSG00000287652	lncRNA	-2.70471	0.0206215	Down-regulated	-0.839068	1	Unchanged
ENSG00000287736	PTCSC1	lncRNA	-2.79482	0.0192907	Down-regulated	0.0962814	1	Unchanged
ENSG00000288547	C3orf36	lncRNA	-2.5298	0.0328479	Down-regulated	-1.46893	1	Unchanged
ENSG00000288865	ENSG00000288865	lncRNA	-3.98081	0.00266105	Down-regulated	-0.35323	1	Unchanged
ENSG00000289298	ENSG00000289298	lncRNA	-2.12425	0.0399086	Down-regulated	-0.826582	1	Unchanged
ENSG00000289340	ENSG00000289340	lncRNA	-2.95907	0.00153425	Down-regulated	-0.610215	1	Unchanged
ENSG00000289829	ENSG00000289829	lncRNA	-1.49535	0.0389281	Down-regulated	1.41947	1	Unchanged
ENSG00000289852	ENSG00000289852	lncRNA	-2.94573	8.73901e-05	Down-regulated	-0.95686	1	Unchanged
ENSG00000289923	ENSG00000289923	lncRNA	-3.1005	0.0399086	Down-regulated	-1.35323	1	Unchanged
ENSG00000289987	ENSG00000289987	lncRNA	-3.34254	5.65858e-12	Down-regulated	-1.00277	1	Unchanged
ENSG00000290021	ENSG00000290021	lncRNA	-2.1029	0.00741926	Down-regulated	0.0126356	1	Unchanged
ENSG00000290041	ENSG00000290041	lncRNA	-2.95693	0.0357587	Down-regulated	-0.713936	1	Unchanged
ENSG00000290059	ENSG00000290059	lncRNA	-3.67277	6.53701e-05	Down-regulated	0.123681	1	Unchanged

## Sheet: Table_S4
Supplementary Table S4. List of differentially expressed lncRNAs genes in diabetic gastroparetics (DG) compared to non-diabetic non-gastroparetic controls (Control).
Differential Expression	Ensembl Gene ID	Gene Symbol	Biotype	log2 (Fold Change)	FDR
Up-regulated	ENSG00000289474	ENSG00000289474	lncRNA	5.74275	0.0163271
Up-regulated	ENSG00000198358	ENSG00000198358	lncRNA	5.51486	0.00270073
Up-regulated	ENSG00000288781	ENSG00000288781	lncRNA	4.48328	0.0248219
Up-regulated	ENSG00000258170	ENSG00000258170	lncRNA	3.54187	0.0055328
Up-regulated	ENSG00000232044	SILC1	lncRNA	3.49523	0.00467269
Up-regulated	ENSG00000288896	ENSG00000288896	lncRNA	3.46048	0.0163304
Up-regulated	ENSG00000257859	CASC18	lncRNA	2.99125	0.00806315
Up-regulated	ENSG00000267567	ENSG00000267567	lncRNA	2.94398	0.0459443
Up-regulated	ENSG00000270933	ENSG00000270933	lncRNA	2.66443	0.00564677
Up-regulated	ENSG00000276850	ENSG00000276850	lncRNA	2.55853	0.0328718
Up-regulated	ENSG00000256196	ENSG00000256196	lncRNA	2.49577	0.00199068
Up-regulated	ENSG00000272953	ENSG00000272953	lncRNA	2.48121	0.000944132
Up-regulated	ENSG00000283075	ENSG00000283075	lncRNA	2.38008	0.00730886
Up-regulated	ENSG00000227292	ENSG00000227292	lncRNA	2.18993	0.0237885
Up-regulated	ENSG00000285999	ENSG00000285999	lncRNA	2.12551	0.026947
Up-regulated	ENSG00000271653	ENSG00000271653	lncRNA	2.10644	0.00530506
Up-regulated	ENSG00000289182	ENSG00000289182	lncRNA	1.95479	8.98271e-06
Up-regulated	ENSG00000264932	ENSG00000264932	lncRNA	1.94974	0.0432521
Up-regulated	ENSG00000290091	ENSG00000290091	lncRNA	1.92858	0.0489282
Up-regulated	ENSG00000261096	ENSG00000261096	lncRNA	1.82857	1.60989e-05
Up-regulated	ENSG00000268403	ENSG00000268403	lncRNA	1.80357	0.00266105
Up-regulated	ENSG00000232821	ENSG00000232821	lncRNA	1.74305	0.0143241
Up-regulated	ENSG00000260589	STAM-DT	lncRNA	1.72034	0.0354907
Up-regulated	ENSG00000289913	ENSG00000289913	lncRNA	1.67647	0.0396919
Up-regulated	ENSG00000288808	ENSG00000288808	lncRNA	1.64612	0.00433365
Up-regulated	ENSG00000197182	MIRLET7BHG	lncRNA	1.63123	6.18615e-05
Up-regulated	ENSG00000264490	ENSG00000264490	lncRNA	1.6068	0.00940627
Up-regulated	ENSG00000272864	ENSG00000272864	lncRNA	1.55177	0.0229383
Up-regulated	ENSG00000253476	ENSG00000253476	lncRNA	1.53731	0.0432521
Up-regulated	ENSG00000273759	ENSG00000273759	lncRNA	1.5281	0.00100764
Up-regulated	ENSG00000284602	ENSG00000284602	lncRNA	1.52277	0.0221248
Up-regulated	ENSG00000288033	ENSG00000288033	lncRNA	1.50745	0.0237885
Up-regulated	ENSG00000277152	ENSG00000277152	lncRNA	1.487	0.0214184
Up-regulated	ENSG00000259370	ENSG00000259370	lncRNA	1.37824	0.0320239
Up-regulated	ENSG00000269399	ENSG00000269399	lncRNA	1.28907	0.0140124
Up-regulated	ENSG00000237512	UNC5B-AS1	lncRNA	1.2845	0.011752
Up-regulated	ENSG00000249669	CARMN	lncRNA	1.28428	0.00759127
Up-regulated	ENSG00000226167	AP4B1-AS1	lncRNA	1.22564	0.0416464
Up-regulated	ENSG00000258949	ENSG00000258949	lncRNA	1.1194	0.0294256
Up-regulated	ENSG00000230630	DNM3OS	lncRNA	1.11773	0.000139467
Up-regulated	ENSG00000287431	RENO1	lncRNA	1.09064	0.0324618
Down-regulated	ENSG00000270640	ENSG00000270640	lncRNA	-5.14132	2.63752e-16
Down-regulated	ENSG00000284669	ENSG00000284669	lncRNA	-4.34116	9.86675e-11
Down-regulated	ENSG00000287458	ENSG00000287458	lncRNA	-4.16984	1.15768e-08
Down-regulated	ENSG00000286882	ENSG00000286882	lncRNA	-4.16162	0.000399958
Down-regulated	ENSG00000288865	ENSG00000288865	lncRNA	-3.98081	0.00266105
Down-regulated	ENSG00000243384	ENSG00000243384	lncRNA	-3.94622	4.42304e-05
Down-regulated	ENSG00000283849	ENSG00000283849	lncRNA	-3.9427	1.40209e-10
Down-regulated	ENSG00000259884	NR4A1AS	lncRNA	-3.70715	1.85702e-06
Down-regulated	ENSG00000290059	ENSG00000290059	lncRNA	-3.67277	6.53701e-05
Down-regulated	ENSG00000261158	ENSG00000261158	lncRNA	-3.57232	0.00912186
Down-regulated	ENSG00000225434	LINC01504	lncRNA	-3.37396	1.59628e-11
Down-regulated	ENSG00000289987	ENSG00000289987	lncRNA	-3.34254	5.65858e-12
Down-regulated	ENSG00000179428	IL6-AS1	lncRNA	-3.1944	0.000179385
Down-regulated	ENSG00000287166	ENSG00000287166	lncRNA	-3.13868	0.0399086
Down-regulated	ENSG00000233791	BTG2-DT	lncRNA	-3.10912	4.36395e-05
Down-regulated	ENSG00000232891	ENSG00000232891	lncRNA	-3.10901	0.0442188
Down-regulated	ENSG00000289923	ENSG00000289923	lncRNA	-3.1005	0.0399086
Down-regulated	ENSG00000228261	ITPRIP-AS1	lncRNA	-3.04554	0.00216737
Down-regulated	ENSG00000286463	ENSG00000286463	lncRNA	-2.97147	3.32186e-05
Down-regulated	ENSG00000289340	ENSG00000289340	lncRNA	-2.95907	0.00153425
Down-regulated	ENSG00000267653	ENSG00000267653	lncRNA	-2.95706	0.00031112
Down-regulated	ENSG00000290041	ENSG00000290041	lncRNA	-2.95693	0.0357587
Down-regulated	ENSG00000289852	ENSG00000289852	lncRNA	-2.94573	8.73901e-05
Down-regulated	ENSG00000287736	PTCSC1	lncRNA	-2.79482	0.0192907
Down-regulated	ENSG00000287652	ENSG00000287652	lncRNA	-2.70471	0.0206215
Down-regulated	ENSG00000285848	ENSG00000285848	lncRNA	-2.67264	0.000197159
Down-regulated	ENSG00000256006	ENSG00000256006	lncRNA	-2.64687	0.00100139
Down-regulated	ENSG00000230470	ENSG00000230470	lncRNA	-2.5879	0.00467269
Down-regulated	ENSG00000288547	C3orf36	lncRNA	-2.5298	0.0328479
Down-regulated	ENSG00000256609	ENSG00000256609	lncRNA	-2.4522	0.00432913
Down-regulated	ENSG00000244953	ENSG00000244953	lncRNA	-2.43509	0.00167922
Down-regulated	ENSG00000224397	PELATON	lncRNA	-2.41068	0.0475087
Down-regulated	ENSG00000276107	THBS1-IT1	lncRNA	-2.39601	0.00317313
Down-regulated	ENSG00000277587	ENSG00000277587	lncRNA	-2.3949	0.00401789
Down-regulated	ENSG00000228804	ENSG00000228804	lncRNA	-2.34147	0.00187045
Down-regulated	ENSG00000232057	ENSG00000232057	lncRNA	-2.30131	0.00148521
Down-regulated	ENSG00000267519	MIR23AHG	lncRNA	-2.30001	0.000607874
Down-regulated	ENSG00000256947	ENSG00000256947	lncRNA	-2.29802	0.0482034
Down-regulated	ENSG00000231507	LINC01353	lncRNA	-2.18471	0.00253089
Down-regulated	ENSG00000265625	ENSG00000265625	lncRNA	-2.15273	0.00266105
Down-regulated	ENSG00000205622	ENSG00000205622	lncRNA	-2.13331	0.00649349
Down-regulated	ENSG00000289298	ENSG00000289298	lncRNA	-2.12425	0.0399086
Down-regulated	ENSG00000272574	ENSG00000272574	lncRNA	-2.10422	0.0010084
Down-regulated	ENSG00000290021	ENSG00000290021	lncRNA	-2.1029	0.00741926
Down-regulated	ENSG00000229951	FOSL2-AS1	lncRNA	-1.99379	6.46324e-06
Down-regulated	ENSG00000226957	ENSG00000226957	lncRNA	-1.93249	0.015308
Down-regulated	ENSG00000286732	ENSG00000286732	lncRNA	-1.89051	0.0382932
Down-regulated	ENSG00000260859	ENSG00000260859	lncRNA	-1.87061	0.0163304
Down-regulated	ENSG00000286735	ENSG00000286735	lncRNA	-1.78721	0.0327605
Down-regulated	ENSG00000203865	ATP1A1-AS1	lncRNA	-1.76657	1.41154e-07
Down-regulated	ENSG00000286458	ENSG00000286458	lncRNA	-1.754	0.00317313
Down-regulated	ENSG00000265179	ENSG00000265179	lncRNA	-1.743	0.00563295
Down-regulated	ENSG00000237989	LINC01679	lncRNA	-1.70822	0.000196328
Down-regulated	ENSG00000248773	ENSG00000248773	lncRNA	-1.60869	0.0464046
Down-regulated	ENSG00000283122	HYMAI	lncRNA	-1.57744	0.0410058
Down-regulated	ENSG00000289829	ENSG00000289829	lncRNA	-1.49535	0.0389281
Down-regulated	ENSG00000230587	LINC02580	lncRNA	-1.45229	0.0110593
Down-regulated	ENSG00000258819	LINC02289	lncRNA	-1.37295	0.0274174
Down-regulated	ENSG00000203392	ENSG00000203392	lncRNA	-1.33809	0.0315763
Down-regulated	ENSG00000272463	ENSG00000272463	lncRNA	-1.25535	0.0142772

## Sheet: Table_S5
Supplementary Table S5. List of differentially expressed lncRNAs genes in diabetic gastroparetics (DG) compared to diabetic non-gastroparetic controls (DC).
Differential Expression	Ensembl Gene ID	Gene Symbol	Biotype	log2 (Fold Change)	FDR
Up-regulated	ENSG00000258170	ENSG00000258170	lncRNA	5.88968	1.02e-06
Up-regulated	ENSG00000289454	ENSG00000289454	lncRNA	4.67211	0.0412205
Up-regulated	ENSG00000215023	ENSG00000215023	lncRNA	4.56666	0.011594
Up-regulated	ENSG00000232044	SILC1	lncRNA	4.45492	0.000233019
Up-regulated	ENSG00000273760	ENSG00000273760	lncRNA	4.43101	0.0259757
Up-regulated	ENSG00000198358	ENSG00000198358	lncRNA	4.36034	0.0239583
Up-regulated	ENSG00000256381	ENSG00000256381	lncRNA	3.87824	0.0221917
Up-regulated	ENSG00000289839	ENSG00000289839	lncRNA	3.8109	0.0236606
Up-regulated	ENSG00000276850	ENSG00000276850	lncRNA	3.76583	0.000247491
Up-regulated	ENSG00000260093	MSRA-DT	lncRNA	2.23768	0.0323701
Up-regulated	ENSG00000228768	MIR365BHG	lncRNA	2.13933	0.0417285
Up-regulated	ENSG00000232821	ENSG00000232821	lncRNA	1.92409	0.0382668
Up-regulated	ENSG00000261340	LINC01616	lncRNA	1.91511	0.0236606
Up-regulated	ENSG00000197182	MIRLET7BHG	lncRNA	1.23774	0.0119165
Down-regulated	ENSG00000289009	ENSG00000289009	lncRNA	-1.10883	0.040713
Down-regulated	ENSG00000245532	NEAT1	lncRNA	-1.20742	0.00210847
Down-regulated	ENSG00000272463	ENSG00000272463	lncRNA	-1.22975	0.0152173
Down-regulated	ENSG00000231329	ENSG00000231329	lncRNA	-1.32133	0.0336698
Down-regulated	ENSG00000241111	PRICKLE2-AS1	lncRNA	-1.42612	0.036142
Down-regulated	ENSG00000236581	STARD13-AS	lncRNA	-1.43785	0.0199428
Down-regulated	ENSG00000237989	LINC01679	lncRNA	-1.43952	0.0183899
Down-regulated	ENSG00000272037	ENSG00000272037	lncRNA	-1.45972	0.0136181
Down-regulated	ENSG00000275880	ENSG00000275880	lncRNA	-1.49119	0.0265516
Down-regulated	ENSG00000203865	ATP1A1-AS1	lncRNA	-1.49899	0.00898902
Down-regulated	ENSG00000289382	ENSG00000289382	lncRNA	-1.52222	0.046444
Down-regulated	ENSG00000269680	ENSG00000269680	lncRNA	-1.56985	0.0132536
Down-regulated	ENSG00000229951	FOSL2-AS1	lncRNA	-1.62994	0.00141937
Down-regulated	ENSG00000270210	ENSG00000270210	lncRNA	-1.64865	0.0282744
Down-regulated	ENSG00000259921	ENSG00000259921	lncRNA	-1.70673	0.00108444
Down-regulated	ENSG00000283122	HYMAI	lncRNA	-1.74294	0.00584059
Down-regulated	ENSG00000286458	ENSG00000286458	lncRNA	-1.74522	0.0409547
Down-regulated	ENSG00000226957	ENSG00000226957	lncRNA	-1.75727	0.0321137
Down-regulated	ENSG00000267519	MIR23AHG	lncRNA	-1.78157	0.000900029
Down-regulated	ENSG00000285850	ENSG00000285850	lncRNA	-1.81431	0.0382668
Down-regulated	ENSG00000253669	GASAL1	lncRNA	-1.87408	0.00898902
Down-regulated	ENSG00000275894	ENSG00000275894	lncRNA	-2.01255	0.032746
Down-regulated	ENSG00000256609	ENSG00000256609	lncRNA	-2.06822	0.0148618
Down-regulated	ENSG00000259138	ENSG00000259138	lncRNA	-2.08602	0.0152173
Down-regulated	ENSG00000205622	ENSG00000205622	lncRNA	-2.11195	0.0119061
Down-regulated	ENSG00000290021	ENSG00000290021	lncRNA	-2.13146	0.00584059
Down-regulated	ENSG00000231507	LINC01353	lncRNA	-2.13204	0.0164905
Down-regulated	ENSG00000272574	ENSG00000272574	lncRNA	-2.20116	0.0318961
Down-regulated	ENSG00000244953	ENSG00000244953	lncRNA	-2.2698	0.036142
Down-regulated	ENSG00000285848	ENSG00000285848	lncRNA	-2.27595	0.000884342
Down-regulated	ENSG00000256006	ENSG00000256006	lncRNA	-2.28681	0.0183201
Down-regulated	ENSG00000233791	BTG2-DT	lncRNA	-2.32072	0.00202375
Down-regulated	ENSG00000228804	ENSG00000228804	lncRNA	-2.34043	0.0232856
Down-regulated	ENSG00000289987	ENSG00000289987	lncRNA	-2.35322	0.000299319
Down-regulated	ENSG00000289340	ENSG00000289340	lncRNA	-2.36419	0.0139124
Down-regulated	ENSG00000179428	IL6-AS1	lncRNA	-2.55781	0.00510527
Down-regulated	ENSG00000237614	ENSG00000237614	lncRNA	-2.56886	0.00564427
Down-regulated	ENSG00000259276	ENSG00000259276	lncRNA	-2.5736	0.0209581
Down-regulated	ENSG00000228261	ITPRIP-AS1	lncRNA	-2.57617	0.04137
Down-regulated	ENSG00000259884	NR4A1AS	lncRNA	-2.66584	0.0097013
Down-regulated	ENSG00000225434	LINC01504	lncRNA	-2.72541	8.85e-05
Down-regulated	ENSG00000261618	LINC02605	lncRNA	-2.84086	0.00679593
Down-regulated	ENSG00000276107	THBS1-IT1	lncRNA	-2.88647	0.00755096
Down-regulated	ENSG00000287736	PTCSC1	lncRNA	-2.89616	0.00679593
Down-regulated	ENSG00000289829	ENSG00000289829	lncRNA	-2.93327	0.017403
Down-regulated	ENSG00000256571	ENSG00000256571	lncRNA	-3.09615	0.0281007
Down-regulated	ENSG00000286882	ENSG00000286882	lncRNA	-3.29883	0.048956
Down-regulated	ENSG00000243384	ENSG00000243384	lncRNA	-3.32409	0.00101052
Down-regulated	ENSG00000254551	ENSG00000254551	lncRNA	-3.35646	0.00799987
Down-regulated	ENSG00000283849	ENSG00000283849	lncRNA	-3.47129	3.33e-08
Down-regulated	ENSG00000284669	ENSG00000284669	lncRNA	-3.49014	8.51e-07
Down-regulated	ENSG00000288865	ENSG00000288865	lncRNA	-3.61094	0.0183201
Down-regulated	ENSG00000254921	ENSG00000254921	lncRNA	-3.77533	0.0243067
Down-regulated	ENSG00000290059	ENSG00000290059	lncRNA	-3.79325	0.00089871
Down-regulated	ENSG00000287400	ENSG00000287400	lncRNA	-3.92892	0.0412205
Down-regulated	ENSG00000287458	ENSG00000287458	lncRNA	-4.02939	7.51e-05
Down-regulated	ENSG00000270640	ENSG00000270640	lncRNA	-4.56216	2.72e-13

## Sheet: Table_S6
Supplementary Table S6. List of differentially expressed genes in Stimulated vs Unstimulated T2D samples but not in Control samples.
				Control: Stimulated vs Unstimulated		T2D: Stimulated vs Unstimulated		Unstimulated: T2D vs Control		Stimulated: T2D vs Control
Differential Expression	Ensembl Gene ID	Gene Symbol	Biotype	log2 (Fold Change)	FDR	log2 (Fold Change)	FDR	log2 (Fold Change)	FDR	log2 (Fold Change)	FDR
Up-regulated	ENSG00000110492	MDK	protein_coding	1.14734	0.803267	1.53507	0.0387275	-0.0516663	1	0.327351	1
Up-regulated	ENSG00000106701	FSD1L	protein_coding	1.89631	0.172088	1.93711	0.012297	0.295049	1	0.329307	1
Up-regulated	ENSG00000285040	ENSG00000285040	lncRNA	2.85574	0.108376	4.29237	0.000985033	-1.41896	1	-0.0121381	1
Up-regulated	ENSG00000128284	APOL3	protein_coding	0.659712	1	1.11296	0.047527	-0.235713	1	0.216082	1
Up-regulated	ENSG00000122641	INHBA	protein_coding	1.89128	0.923729	2.86532	0.025427	-1.24024	1	-0.267804	1
Up-regulated	ENSG00000154548	SRSF12	protein_coding	1.80085	0.887327	3.23883	0.00202952	-0.717228	1	0.69822	1
Up-regulated	ENSG00000269385	ENSG00000269385	unprocessed_pseudogene	5.55148	0.0837147	4.19395	0.0108692	1.25899	1	-0.254847	1
Up-regulated	ENSG00000160013	PTGIR	protein_coding	1.47948	0.248253	1.60188	0.0121339	-0.00279422	1	0.108912	1
Up-regulated	ENSG00000279693	ENSG00000279693	TEC	0.62452	1	1.79406	0.0447934	-0.745468	1	0.415119	1
Up-regulated	ENSG00000162645	GBP2	protein_coding	1.24655	0.297272	1.4542	0.0293894	-0.101284	1	0.104207	1
Up-regulated	ENSG00000188676	IDO2	protein_coding	2.88684	0.0656176	4.06451	2.4208e-05	-0.605258	1	0.571977	1
Up-regulated	ENSG00000128602	SMO	protein_coding	0.869826	1	2.15121	0.0433743	-0.396416	1	0.872847	1
Up-regulated	ENSG00000188290	HES4	protein_coding	2.82999	0.503691	3.11242	0.0293268	0.381924	1	0.668722	1
Up-regulated	ENSG00000290087	ENSG00000290087	lncRNA	2.46891	0.217997	2.40721	0.0274446	0.294425	1	0.222669	1
Up-regulated	ENSG00000226025	LGALS17A	transcribed_unprocessed_pseudogene	2.1329	0.336222	3.16582	0.000303101	-0.448317	1	0.578342	1
Up-regulated	ENSG00000100226	GTPBP1	protein_coding	1.34932	0.0631886	1.27326	0.00744051	0.152107	1	0.0741842	1
Up-regulated	ENSG00000125657	TNFSF9	protein_coding	1.89962	0.103093	1.68182	0.00966813	0.37581	1	0.162084	1
Up-regulated	ENSG00000064886	CHI3L2	protein_coding	1.71258	0.150326	1.96093	0.00242426	-0.282133	1	-0.045522	1
Up-regulated	ENSG00000229677	ENSG00000229677	processed_pseudogene	1.32556	0.641589	1.56039	0.0386265	-0.0417701	1	0.196338	1
Up-regulated	ENSG00000172602	RND1	protein_coding	1.05943	1	1.66724	0.0348807	-0.0285463	1	0.574376	1
Up-regulated	ENSG00000109756	RAPGEF2	protein_coding	1.26676	0.287648	1.41606	0.00312816	0.0414668	1	0.189608	1
Up-regulated	ENSG00000099860	GADD45B	protein_coding	0.930313	0.675758	1.15477	0.0300486	0.0988023	1	0.31868	1
Up-regulated	ENSG00000132517	SLC52A1	protein_coding	1.36989	0.492266	1.71437	0.0340037	-0.387453	1	-0.0406961	1
Up-regulated	ENSG00000113368	LMNB1	protein_coding	0.924187	1	1.31086	0.00161591	-0.413864	1	-0.0247516	1
Up-regulated	ENSG00000151726	ACSL1	protein_coding	1.74074	0.313953	2.05275	0.0258181	0.0677619	1	0.374036	1
Up-regulated	ENSG00000235750	KIAA0040	protein_coding	1.08494	0.27193	1.05286	0.0268347	0.177641	1	0.144947	1
Up-regulated	ENSG00000232855	ENSG00000232855	lncRNA	1.57861	0.123415	1.85972	0.016113	-0.00796736	1	0.272492	1
Up-regulated	ENSG00000185338	SOCS1	protein_coding	1.65457	0.136263	1.92251	0.00428157	-0.0605497	1	0.204353	1
Up-regulated	ENSG00000013374	NUB1	protein_coding	1.28153	0.0524508	1.35378	0.00370974	0.0675161	1	0.137562	1
Up-regulated	ENSG00000174502	SLC26A9	protein_coding	4.1506	0.141166	4.12996	0.0287101	1.27672	1	1.20647	1
Up-regulated	ENSG00000204264	PSMB8	protein_coding	0.998862	0.287648	1.00573	0.0409185	0.0871093	1	0.0898404	1
Up-regulated	ENSG00000205755	CRLF2	protein_coding	1.96341	0.386302	1.81089	0.0116521	-0.415358	1	-0.567127	1
Up-regulated	ENSG00000095794	CREM	protein_coding	1.2303	0.267937	1.14307	0.0193208	0.310995	1	0.221948	1
Up-regulated	ENSG00000273604	EPOP	protein_coding	1.0065	0.643319	1.12515	0.0473931	0.0241861	1	0.141841	1
Up-regulated	ENSG00000170542	SERPINB9	protein_coding	1.08804	0.772699	1.24104	0.0387275	0.0635506	1	0.211591	1
Up-regulated	ENSG00000035720	STAP1	protein_coding	1.67314	0.0651068	1.72219	0.00190805	0.148683	1	0.19204	1
Up-regulated	ENSG00000184588	PDE4B	protein_coding	1.07915	0.65082	1.27306	0.0348807	0.0361597	1	0.2259	1
Up-regulated	ENSG00000182541	LIMK2	protein_coding	1.59547	0.688288	1.93987	0.0201585	0.155134	1	0.494666	1
Up-regulated	ENSG00000175354	PTPN2	protein_coding	1.06679	0.452947	1.28528	0.00161763	0.12733	1	0.343697	1
Up-regulated	ENSG00000072274	TFRC	protein_coding	1.19115	1	1.31734	0.0437557	0.114963	1	0.230998	1
Up-regulated	ENSG00000289582	ENSG00000289582	lncRNA	1.83038	0.121707	2.37389	0.000649098	-0.569629	1	-0.0325189	1
Up-regulated	ENSG00000289925	ENSG00000289925	lncRNA	1.01949	1	4.58636	0.0346523	-2.39239	1	1.10641	1
Up-regulated	ENSG00000120217	CD274	protein_coding	1.78201	0.289409	2.25743	0.00282312	-0.399113	1	0.0786688	1
Up-regulated	ENSG00000096968	JAK2	protein_coding	0.938134	1	1.09117	0.0456291	-0.230159	1	-0.0772085	1
Up-regulated	ENSG00000109320	NFKB1	protein_coding	1.00071	0.656361	1.18026	0.0322884	-0.0854838	1	0.0918622	1
Up-regulated	ENSG00000180233	ZNRF2	protein_coding	1.03552	0.596357	1.35819	0.00456	-0.118681	1	0.196563	1
Up-regulated	ENSG00000285630	ENSG00000285630	lncRNA	2.15071	1	6.06827	0.000147909	-3.78148	1	0.101779	1
Up-regulated	ENSG00000124201	ZNFX1	protein_coding	1.44789	0.0546544	1.34116	0.0265591	0.234042	1	0.126172	1
Up-regulated	ENSG00000158470	B4GALT5	protein_coding	1.4112	0.377136	1.7764	0.00199256	0.171295	1	0.533737	1
Up-regulated	ENSG00000102794	ACOD1	protein_coding	4.27192	0.15555	4.83758	0.00086328	0.328716	1	0.8964	1
Up-regulated	ENSG00000267737	ENSG00000267737	lncRNA	2.24544	0.552155	2.65063	0.0186033	0.551812	1	0.944917	1
Up-regulated	ENSG00000156500	PABIR3	protein_coding	0.896844	0.520211	1.03604	0.028188	-0.0297676	1	0.107011	1
Up-regulated	ENSG00000133321	PLAAT4	protein_coding	0.987106	0.172403	1.17093	0.00328086	-0.0755234	1	0.108258	1
Up-regulated	ENSG00000198673	TAFA2	protein_coding	1.48363	0.34817	1.67045	0.0145233	-0.0522136	1	0.134977	1
Up-regulated	ENSG00000151136	BTBD11	protein_coding	1.02608	0.123476	1.0689	0.00744927	0.244253	1	0.281214	1
Up-regulated	ENSG00000167617	CDC42EP5	protein_coding	3.86251	0.222792	3.63637	0.00178605	0.0600344	1	-0.166944	1
Up-regulated	ENSG00000267478	ENSG00000267478	processed_pseudogene	1.44839	1	2.78417	0.0447934	-0.567163	1	0.811096	1
Up-regulated	ENSG00000196517	SLC6A9	protein_coding	1.39939	0.189731	1.93837	0.00208428	-0.584112	1	-0.0483306	1
Up-regulated	ENSG00000264269	DYM-AS1	lncRNA	4.73406	0.531166	5.34522	0.00146588	1.23097	1	1.70894	1
Up-regulated	ENSG00000287263	ENSG00000287263	lncRNA	1.19956	0.0535116	1.32889	0.00212219	-0.0510938	1	0.0776386	1
Up-regulated	ENSG00000204397	CARD16	protein_coding	1.18921	0.215699	1.20493	0.0268347	0.170833	1	0.180837	1
Up-regulated	ENSG00000135074	ADAM19	protein_coding	1.20534	0.667734	1.52446	0.0066034	-0.208483	1	0.104586	1
Up-regulated	ENSG00000147434	CHRNA6	protein_coding	1.7052	1	2.55139	0.00583296	-0.602847	1	0.237875	1
Up-regulated	ENSG00000261644	CYLD-AS1	lncRNA	0.855919	0.92426	1.21345	0.0204127	-0.245428	1	0.109821	1
Up-regulated	ENSG00000272512	ENSG00000272512	lncRNA	3.66326	0.25222	3.75121	0.00530424	-0.532771	1	-0.419845	1
Up-regulated	ENSG00000148735	PLEKHS1	protein_coding	1.25087	1	1.50596	0.0469161	0.203677	1	0.49027	1
Up-regulated	ENSG00000114315	HES1	protein_coding	1.99618	0.791465	2.40273	0.037904	0.088912	1	0.485469	1
Up-regulated	ENSG00000134470	IL15RA	protein_coding	1.63288	0.405961	1.96137	0.00801039	-0.162976	1	0.164895	1
Up-regulated	ENSG00000100219	XBP1	protein_coding	1.02361	0.429573	1.08713	0.0195661	0.0737596	1	0.135271	1
Up-regulated	ENSG00000185245	GP1BA	protein_coding	2.52779	0.300865	3.23281	0.00428157	-0.399976	1	0.300561	1
Up-regulated	ENSG00000148175	STOM	protein_coding	1.34556	0.287847	1.43072	0.00716099	0.210878	1	0.29383	1
Up-regulated	ENSG00000138755	CXCL9	protein_coding	0.22277	1	1.57767	0.0495488	-0.771417	1	0.599409	1
Up-regulated	ENSG00000230943	LINC02541	lncRNA	2.40197	0.0683724	2.37495	0.0235151	0.219155	1	0.172866	1
Up-regulated	ENSG00000133116	KL	protein_coding	2.21092	0.552155	2.5778	0.0181985	0.223784	1	0.591635	1
Up-regulated	ENSG00000272666	KLHDC7B-DT	lncRNA	1.73055	0.273006	1.73741	0.03257	0.237704	1	0.234442	1
Up-regulated	ENSG00000168016	TRANK1	protein_coding	1.3698	0.0511783	1.34871	0.0140832	0.0270657	1	0.0033595	1
Up-regulated	ENSG00000182782	HCAR2	protein_coding	1.47672	0.485865	2.83426	0.00119213	-1.76964	1	-0.411191	1
Up-regulated	ENSG00000205436	EXOC3L4	protein_coding	2.51883	0.164103	3.71719	0.00208428	-0.942228	1	0.210347	1
Up-regulated	ENSG00000171204	TMEM126B	protein_coding	0.948978	0.132151	1.0919	0.006821	0.123749	1	0.263639	1
Up-regulated	ENSG00000125462	MIR9-1HG	lncRNA	1.81605	0.236542	1.77238	0.0140109	0.102759	1	0.0556368	1
Up-regulated	ENSG00000285744	ENSG00000285744	lncRNA	2.14526	0.338098	2.4732	0.0265591	0.135472	1	0.455361	1
Up-regulated	ENSG00000256235	SMIM3	protein_coding	1.30287	0.898113	1.27852	0.0283676	0.219343	1	0.193538	1
Up-regulated	ENSG00000100342	APOL1	protein_coding	1.23834	0.152652	1.4951	0.00146588	-0.111882	1	0.144293	1
Up-regulated	ENSG00000226212	TRGV6	TR_V_pseudogene	2.67466	0.313953	3.1513	0.00139198	0.652643	1	1.11234	1
Up-regulated	ENSG00000151466	SCLT1	protein_coding	1.24803	0.0651068	1.19786	0.0233182	0.12272	1	0.0707714	1
Up-regulated	ENSG00000171049	FPR2	protein_coding	3.6357	0.14326	3.06763	0.0489213	1.06962	1	0.48913	1
Up-regulated	ENSG00000183484	GPR132	protein_coding	0.958711	0.870848	1.07421	0.0244734	0.021319	1	0.13471	1
Up-regulated	ENSG00000226233	ENSG00000226233	processed_pseudogene	1.66314	0.683231	2.00104	0.0217261	-0.144644	1	0.170806	1
Up-regulated	ENSG00000111012	CYP27B1	protein_coding	2.36313	0.115728	2.51602	0.0093314	0.106375	1	0.259895	1
Up-regulated	ENSG00000071203	MS4A12	protein_coding	2.73212	1	4.89774	0.0181502	0	1	1.93946	1
Up-regulated	ENSG00000120254	MTHFD1L	protein_coding	1.07101	0.190318	1.25155	0.0025762	-0.0264507	1	0.143721	1
Up-regulated	ENSG00000113916	BCL6	protein_coding	1.1973	0.245446	1.15984	0.0368333	0.22615	1	0.181363	1
Up-regulated	ENSG00000187595	ZNF385C	protein_coding	1.88395	0.0564574	2.58236	0.000213899	-0.362719	1	0.324299	1
Up-regulated	ENSG00000179241	LDLRAD3	protein_coding	3.38704	0.446697	3.23018	0.00817074	0.281623	1	0.108698	1
Up-regulated	ENSG00000234518	PTGES3P1	processed_pseudogene	1.22883	0.141166	1.45957	0.00575792	-0.197604	1	0.0313285	1
Up-regulated	ENSG00000163673	DCLK3	protein_coding	2.50473	0.282511	2.52173	0.0115518	-0.360084	1	-0.351801	1
Up-regulated	ENSG00000180817	PPA1	protein_coding	1.3385	0.269938	1.57956	0.000769457	0.0593941	1	0.298019	1
Up-regulated	ENSG00000228701	TNKS2-DT	lncRNA	1.6692	0.456042	1.54685	0.0465673	0.185479	1	0.0473641	1
Up-regulated	ENSG00000204267	TAP2	protein_coding	1.2671	0.0699203	1.40122	0.0042819	-0.0245296	1	0.107128	1
Up-regulated	ENSG00000163874	ZC3H12A	protein_coding	0.90958	0.950104	1.14845	0.0380104	-0.038523	1	0.195175	1
Up-regulated	ENSG00000188015	S100A3	protein_coding	2.50368	1	2.92011	0.0206812	0.312123	1	0.78785	1
Up-regulated	ENSG00000222017	ENSG00000222017	lncRNA	1.8441	0.972183	2.50141	0.0455465	-1.33219	1	-0.681711	1
Up-regulated	ENSG00000105321	CCDC9	protein_coding	1.1082	0.0675374	1.05437	0.00541525	0.0734269	1	0.0130998	1
Up-regulated	ENSG00000003400	CASP10	protein_coding	1.03989	0.260679	1.15361	0.0443781	0.1943	1	0.304063	1
Up-regulated	ENSG00000159335	PTMS	protein_coding	1.03383	0.803267	1.20453	0.021716	0.246807	1	0.419797	1
Up-regulated	ENSG00000276085	CCL3L1	protein_coding	1.49	1	2.24682	0.00882092	-0.0249105	1	0.723117	1
Up-regulated	ENSG00000165694	FRMD7	protein_coding	1.68458	1	4.30583	0.00146588	-2.94875	1	-0.364199	1
Up-regulated	ENSG00000117226	GBP3	protein_coding	1.09453	0.983634	1.25225	0.0143445	0.655292	1	0.81265	1
Up-regulated	ENSG00000213512	GBP7	protein_coding	1.85002	0.0806272	2.3124	0.00215367	0.18687	1	0.651934	1
Up-regulated	ENSG00000171522	PTGER4	protein_coding	1.25375	0.0604463	1.61464	0.000409886	-0.0883867	1	0.268673	1
Up-regulated	ENSG00000103855	CD276	protein_coding	1.80193	0.253532	2.06687	0.0204127	-0.217479	1	0.0387893	1
Up-regulated	ENSG00000198829	SUCNR1	protein_coding	2.53546	0.796618	3.41716	8.50514e-05	-1.32841	1	-0.440726	1
Up-regulated	ENSG00000131203	IDO1	protein_coding	2.1583	0.543355	3.04089	0.00252968	-0.55242	1	0.331562	1
Up-regulated	ENSG00000231574	LINC02015	lncRNA	3.84109	0.773074	4.33801	0.0137966	1.18232	1	1.54382	1
Up-regulated	ENSG00000169946	ZFPM2	protein_coding	2.52395	0.490846	3.6996	0.00738821	-1.0845	1	0.0773283	1
Up-regulated	ENSG00000155287	SLC25A28	protein_coding	1.14879	0.137125	1.17395	0.00539419	0.0820025	1	0.103923	1
Up-regulated	ENSG00000184371	CSF1	protein_coding	0.334066	1	1.43724	0.00923912	-1.68521	0.953902	-0.591075	1
Up-regulated	ENSG00000268088	ENSG00000268088	transcribed_unprocessed_pseudogene	1.7685	1	2.46597	0.0262727	-0.429231	1	0.261786	1
Up-regulated	ENSG00000288737	ENSG00000288737	lncRNA	2.58224	1	4.67446	0.0229526	-1.64927	1	0.479339	1
Up-regulated	ENSG00000168502	MTCL1	protein_coding	2.38291	0.103684	1.85232	0.0102831	-0.162938	1	-0.692422	1
Up-regulated	ENSG00000151240	DIP2C	protein_coding	0.939284	0.692238	1.21757	0.00801279	-0.398191	1	-0.125416	1
Up-regulated	ENSG00000080986	NDC80	protein_coding	1.4782	0.0907245	1.57769	0.00370974	-0.193971	1	-0.0933554	1
Up-regulated	ENSG00000286674	ENSG00000286674	lncRNA	5.76299	0.179061	6.29367	0.00086328	0	1	0.357065	1
Up-regulated	ENSG00000101577	LPIN2	protein_coding	1.15969	0.119854	1.11555	0.0255774	0.159739	1	0.115412	1
Up-regulated	ENSG00000258738	BAZ1A-AS1	lncRNA	1.23083	0.172088	1.15924	0.0297135	0.0893363	1	0.0147282	1
Up-regulated	ENSG00000125733	TRIP10	protein_coding	1.41913	0.359553	1.48949	0.0127652	0.146291	1	0.210645	1
Up-regulated	ENSG00000145901	TNIP1	protein_coding	1.2334	0.615469	1.47786	0.0291939	0.0386761	1	0.27742	1
Up-regulated	ENSG00000198604	BAZ1A	protein_coding	1.0451	0.324993	1.13814	0.0385746	0.0575721	1	0.147738	1
Up-regulated	ENSG00000155158	TTC39B	protein_coding	1.07542	0.267937	1.11244	0.00801279	-0.536044	1	-0.499219	1
Up-regulated	ENSG00000173559	NABP1	protein_coding	1.60865	0.179061	1.65664	0.000894607	0.0674831	1	0.114322	1
Up-regulated	ENSG00000275693	ENSG00000275693	misc_RNA	0.934896	1	2.85542	0.0191137	-1.34888	1	0.562903	1
Up-regulated	ENSG00000140379	BCL2A1	protein_coding	1.66603	0.303925	2.06164	0.00168357	-0.0484609	1	0.3451	1
Up-regulated	ENSG00000168394	TAP1	protein_coding	1.10745	0.528156	1.2787	0.0400326	-0.134026	1	0.0366713	1
Up-regulated	ENSG00000089351	GRAMD1A	protein_coding	1.51589	0.217532	1.63954	0.0255203	0.1169	1	0.229942	1
Up-regulated	ENSG00000163959	SLC51A	protein_coding	2.68537	1	3.92511	0.00277937	-1.01298	1	0.236261	1
Up-regulated	ENSG00000236567	TCF3P1	processed_pseudogene	0.446728	1	2.05742	0.01702	-1.6887	1	-0.0849983	1
Up-regulated	ENSG00000280270	ENSG00000280270	TEC	2.38593	0.1692	3.08205	0.00106389	-1.48337	1	-0.779919	1
Up-regulated	ENSG00000128335	APOL2	protein_coding	1.1128	0.446697	1.34551	0.00902473	-0.0922751	1	0.141687	1
Up-regulated	ENSG00000103257	SLC7A5	protein_coding	1.07831	0.626237	1.51738	0.0125412	-0.201981	1	0.237894	1
Up-regulated	ENSG00000108702	CCL1	protein_coding	1.77322	1	2.29462	0.0387275	-2.79979	1	-2.28557	1
Up-regulated	ENSG00000106100	NOD1	protein_coding	1.01955	0.4202	1.23707	0.0218684	-0.0421505	1	0.16996	1
Up-regulated	ENSG00000262160	ENSG00000262160	lncRNA	1.29057	1	3.23491	0.00208428	-0.574835	1	1.31977	1
Up-regulated	ENSG00000151014	NOCT	protein_coding	2.67077	0.145195	3.25	2.007e-05	-0.140105	1	0.438809	1
Up-regulated	ENSG00000197536	IRF1-AS1	lncRNA	1.09931	0.0616196	1.14697	0.00363566	-0.0917009	1	-0.0438672	1
Up-regulated	ENSG00000103241	FOXF1	protein_coding	2.49631	0.450124	2.80401	0.0162375	-0.431613	1	-0.10866	1
Up-regulated	ENSG00000269720	CCDC194	protein_coding	1.9094	0.0662238	1.6366	0.0233182	0.312654	1	0.0352801	1
Up-regulated	ENSG00000228863	ENSG00000228863	lncRNA	2.66734	0.127801	2.75439	0.00161763	-0.0488751	1	0.0376991	1
Up-regulated	ENSG00000146425	DYNLT1	protein_coding	1.37293	0.0741564	1.31223	0.00910878	0.28252	1	0.221139	1
Up-regulated	ENSG00000141753	IGFBP4	protein_coding	2.2194	0.119468	2.11906	0.00121811	0.187984	1	0.0909997	1
Up-regulated	ENSG00000156587	UBE2L6	protein_coding	1.39234	0.0533399	1.36593	0.0135816	0.135873	1	0.105774	1
Up-regulated	ENSG00000267365	KCNJ2-AS1	lncRNA	2.17893	0.506028	2.98146	0.00801279	-0.31156	1	0.478051	1
Up-regulated	ENSG00000137393	RNF144B	protein_coding	1.80634	0.172088	2.06032	0.00777196	0.270661	1	0.518489	1
Up-regulated	ENSG00000236136	ADORA2BP1	processed_pseudogene	1.71107	1	4.21051	0.0319195	-1.22205	1	1.22429	1
Up-regulated	ENSG00000253838	ENSG00000253838	lncRNA	1.59442	1	2.32937	0.0437557	-0.606812	1	0.128221	1
Up-regulated	ENSG00000137726	FXYD6	protein_coding	3.01391	0.596452	2.98876	0.0240426	0.325475	1	0.288135	1
Up-regulated	ENSG00000230438	SERPINB9P1	lncRNA	1.44111	0.0783918	1.59334	0.00984676	0.0348401	1	0.177858	1
Up-regulated	ENSG00000117090	SLAMF1	protein_coding	1.8956	0.117761	1.77144	0.00312816	0.230861	1	0.10546	1
Up-regulated	ENSG00000232810	TNF	protein_coding	1.70008	0.485232	1.61073	0.0222117	-1.05154	1	-1.13983	1
Up-regulated	ENSG00000240065	PSMB9	protein_coding	0.930888	0.516857	1.01467	0.0233182	0.0532822	1	0.134343	1
Up-regulated	ENSG00000107796	ACTA2	protein_coding	1.3532	0.0836605	1.4855	0.00539419	-0.249017	1	-0.118121	1
Up-regulated	ENSG00000008118	CAMK1G	protein_coding	2.66011	0.336222	3.28971	0.00506681	0.0578868	1	0.677918	1
Up-regulated	ENSG00000253891	ENSG00000253891	lncRNA	1.75624	0.602978	2.47609	0.0173052	0.203193	1	0.893973	1
Up-regulated	ENSG00000105509	HAS1	protein_coding	3.73458	0.306627	4.04767	0.00914603	-0.798592	1	-0.4983	1
Up-regulated	ENSG00000183695	MRGPRX2	protein_coding	2.12423	0.883737	2.39252	0.0490871	0.204357	1	0.484344	1
Up-regulated	ENSG00000117643	MAN1C1	protein_coding	0.773668	0.592792	1.02541	0.0447989	-0.0771394	1	0.170126	1
Up-regulated	ENSG00000125430	HS3ST3B1	protein_coding	1.34007	0.268658	1.44583	0.04212	0.468448	1	0.569676	1
Up-regulated	ENSG00000163217	BMP10	protein_coding	3.46958	0.162972	2.33664	0.0448258	1.76956	1	0.631959	1
Up-regulated	ENSG00000156206	CFAP161	protein_coding	2.23124	0.734632	3.35503	0.00830763	-0.629157	1	0.468728	1
Up-regulated	ENSG00000237576	LINC01888	lncRNA	0.342326	1	2.57278	0.0202713	-1.00661	1	1.22361	1
Up-regulated	ENSG00000196396	PTPN1	protein_coding	0.951592	0.820554	1.09316	0.0482267	0.25243	1	0.389811	1
Up-regulated	ENSG00000182168	UNC5C	protein_coding	3.64857	0.334165	4.19075	0.029433	-1.39886	1	-0.841685	1
Up-regulated	ENSG00000154451	GBP5	protein_coding	1.60412	0.602115	2.2235	0.0209346	-0.394324	1	0.233031	1
Up-regulated	ENSG00000105711	SCN1B	protein_coding	2.57112	0.0500968	2.42336	0.0108593	0.405902	1	0.248437	1
Up-regulated	ENSG00000180988	OR52N2	protein_coding	2.7389	1	4.69314	0.00744051	-1.62802	1	0.226763	1
Up-regulated	ENSG00000173821	RNF213	protein_coding	1.58394	0.121313	1.53864	0.0387608	-0.215815	1	-0.262708	1
Up-regulated	ENSG00000255221	CARD17	transcribed_unprocessed_pseudogene	2.14667	0.112755	2.62564	0.00263754	-0.433893	1	0.0332093	1
Up-regulated	ENSG00000250742	LINC02381	lncRNA	2.03586	0.492191	2.67847	0.0120384	-0.308394	1	0.303759	1
Up-regulated	ENSG00000020577	SAMD4A	protein_coding	1.42987	0.409396	1.48512	0.0448258	-0.13572	1	-0.0835105	1
Up-regulated	ENSG00000111262	KCNA1	protein_coding	3.17933	0.29314	3.40248	0.0464103	-0.469629	1	-0.307892	1
Up-regulated	ENSG00000136048	DRAM1	protein_coding	1.48519	0.566516	1.69097	0.0233182	0.0998562	1	0.298553	1
Up-regulated	ENSG00000240023	RPLP0P3	processed_pseudogene	0.589685	1	2.48595	0.0198273	-0.775196	1	1.09828	1
Up-regulated	ENSG00000276409	CCL14	protein_coding	4.07926	0.766895	4.22442	0.0499945	0	1	0.00190763	1
Up-regulated	ENSG00000172403	SYNPO2	protein_coding	0.865448	1	1.7222	0.0209632	-0.787152	1	0.0605696	1
Up-regulated	ENSG00000256262	USP30-AS1	lncRNA	0.99121	0.654083	1.30445	0.0309819	-0.224831	1	0.0862238	1
Up-regulated	ENSG00000131979	GCH1	protein_coding	1.77615	0.072811	1.90845	0.00250578	0.156115	1	0.291354	1
Up-regulated	ENSG00000065911	MTHFD2	protein_coding	0.773086	1	1.04469	0.0208755	-0.174848	1	0.0964003	1
Up-regulated	ENSG00000120526	NUDCD1	protein_coding	0.760937	0.828956	1.04549	0.0136191	0.0681005	1	0.351002	1
Up-regulated	ENSG00000255398	HCAR3	protein_coding	1.33705	0.680407	2.12455	0.0232342	-1.53561	1	-0.749542	1
Up-regulated	ENSG00000213172	ENSG00000213172	processed_pseudogene	0.67624	1	3.47852	0.0201121	-2.59139	1	0.308036	1
Up-regulated	ENSG00000244491	ENSG00000244491	lncRNA	2.077	0.107054	2.09966	0.00817074	0.0590162	1	0.0551555	1
Up-regulated	ENSG00000172817	CYP7B1	protein_coding	2.17612	0.565121	2.92386	0.00412037	-0.880189	1	-0.130767	1
Up-regulated	ENSG00000196954	CASP4	protein_coding	1.00708	0.484359	1.16434	0.0207895	0.0837665	1	0.238483	1
Up-regulated	ENSG00000160326	SLC2A6	protein_coding	1.50227	0.108376	1.63135	0.0189622	-0.0405359	1	0.0771174	1
Up-regulated	ENSG00000075618	FSCN1	protein_coding	1.67778	0.330624	1.61467	0.00598284	-0.233002	1	-0.295769	1
Up-regulated	ENSG00000073331	ALPK1	protein_coding	0.859736	0.220645	1.04702	0.00966813	-0.103247	1	0.0763108	1
Up-regulated	ENSG00000140105	WARS1	protein_coding	0.90164	1	1.56051	0.0173052	-0.636296	1	0.027571	1
Up-regulated	ENSG00000169248	CXCL11	protein_coding	3.28385	0.316729	3.46962	0.00428157	0.351026	1	0.557426	1
Up-regulated	ENSG00000156219	ART3	protein_coding	2.84655	0.529515	3.52465	0.0058017	-0.478028	1	0.216103	1
Up-regulated	ENSG00000138378	STAT4	protein_coding	1.02692	0.518792	1.03459	0.0397186	0.0387704	1	0.0504315	1
Up-regulated	ENSG00000160190	SLC37A1	protein_coding	0.894223	0.270289	1.00041	0.00826736	0.0356606	1	0.136498	1
Up-regulated	ENSG00000281593	ENSG00000281593	protein_coding	1.66484	0.963049	1.92539	0.0204127	0.462447	1	0.724108	1
Up-regulated	ENSG00000279296	PRAL	TEC	1.66193	0.530393	2.35244	0.00451969	-0.172347	1	0.472765	1
Up-regulated	ENSG00000144837	PLA1A	protein_coding	1.94531	0.132322	2.74339	0.0191137	-0.591307	1	0.189697	1
Up-regulated	ENSG00000078053	AMPH	protein_coding	4.03269	0.0812974	4.73316	0.00480633	0.487216	1	1.16993	1
Up-regulated	ENSG00000104320	NBN	protein_coding	1.16828	0.215374	1.35207	0.006707	-0.0313801	1	0.148692	1
Up-regulated	ENSG00000131797	CLUHP3	transcribed_unprocessed_pseudogene	0.890739	0.475726	1.57221	0.0157789	0.0585385	1	0.742239	1
Up-regulated	ENSG00000249249	TICAM2-AS1	lncRNA	1.71359	0.696542	1.6044	0.0482104	0.0791818	1	-0.022249	1
Up-regulated	ENSG00000078098	FAP	protein_coding	1.76005	0.40782	2.51423	0.0169008	-0.394895	1	0.331277	1
Up-regulated	ENSG00000070808	CAMK2A	protein_coding	2.66206	1	5.11396	0.0319195	-1.07737	1	1.22399	1
Up-regulated	ENSG00000050730	TNIP3	protein_coding	3.0949	0.0604463	2.99544	0.00205249	0.534459	1	0.42849	1
Up-regulated	ENSG00000127074	RGS13	protein_coding	2.71748	0.0546504	2.777	0.00208428	0.995864	1	1.04253	1
Up-regulated	ENSG00000196878	LAMB3	protein_coding	1.97466	0.261849	2.34478	0.00348686	0.244321	1	0.600192	1
Up-regulated	ENSG00000156127	BATF	protein_coding	1.06403	0.572069	1.27154	0.00520856	0.123398	1	0.331413	1
Up-regulated	ENSG00000106605	BLVRA	protein_coding	1.77995	0.283465	1.83306	0.00923912	0.239667	1	0.286618	1
Up-regulated	ENSG00000165997	ARL5B	protein_coding	1.03302	0.216343	1.19285	0.00553891	-0.0059721	1	0.150406	1
Up-regulated	ENSG00000230647	ENSG00000230647	lncRNA	2.959	0.114543	2.78981	0.0466403	0.433349	1	0.248172	1
Up-regulated	ENSG00000238045	MVP-DT	lncRNA	1.57796	0.137125	1.86067	0.000828772	-0.115045	1	0.167225	1
Up-regulated	ENSG00000176076	KCNE5	protein_coding	2.07788	0.750035	2.80478	0.00246394	-0.665947	1	0.0634892	1
Up-regulated	ENSG00000158457	TSPAN33	protein_coding	1.26931	0.267937	1.46586	0.0164593	0.0677625	1	0.25724	1
Up-regulated	ENSG00000174837	ADGRE1	protein_coding	2.44747	0.110613	2.75352	0.00683181	0.949015	1	1.24924	1
Up-regulated	ENSG00000111912	NCOA7	protein_coding	0.915314	0.359553	1.08536	0.00922797	0.0893865	1	0.259485	1
Up-regulated	ENSG00000137752	CASP1	protein_coding	0.92917	0.850847	1.13274	0.0368333	0.0548228	1	0.255116	1
Up-regulated	ENSG00000154645	CHODL	protein_coding	1.32098	0.596357	2.07826	0.0297135	-0.807272	1	-0.0752058	1
Up-regulated	ENSG00000239948	RN7SL368P	misc_RNA	1.50113	1	2.59648	0.0116521	-0.651177	1	0.442643	1
Up-regulated	ENSG00000123685	BATF3	protein_coding	1.37905	0.267937	1.92309	0.00021292	-0.40473	1	0.137074	1
Up-regulated	ENSG00000145287	PLAC8	protein_coding	1.04584	0.303968	1.21132	0.00370974	0.273103	1	0.433549	1
Up-regulated	ENSG00000238168	IFITM3P5	processed_pseudogene	2.51759	0.315902	2.36104	0.0348356	0.0312396	1	-0.155004	1
Up-regulated	ENSG00000145623	OSMR	protein_coding	2.46399	1	4.63283	0.000151341	-0.666312	1	1.51444	1
Up-regulated	ENSG00000119866	BCL11A	protein_coding	1.35681	0.145195	1.27034	0.0225746	0.0608321	1	-0.0326091	1
Up-regulated	ENSG00000117228	GBP1	protein_coding	1.92217	0.133003	2.50116	0.000538197	-0.492485	1	0.0947382	1
Up-regulated	ENSG00000026751	SLAMF7	protein_coding	2.08853	0.108006	2.65116	0.000894607	-0.0644877	1	0.498546	1
Up-regulated	ENSG00000205045	SLFN12L	protein_coding	1.07876	0.248401	1.08984	0.0493476	-0.226083	1	-0.214474	1
Up-regulated	ENSG00000101017	CD40	protein_coding	1.37656	0.157258	1.76657	0.00139352	-0.317339	1	0.0661565	1
Up-regulated	ENSG00000270354	ENSG00000270354	processed_pseudogene	3.86413	0.58779	4.68098	0.04602	0	1	0.606121	1
Up-regulated	ENSG00000164920	OSR2	protein_coding	3.37221	0.261577	4.65716	0.000248734	-0.68187	1	0.578462	1
Up-regulated	ENSG00000128965	CHAC1	protein_coding	1.47135	0.107054	2.11444	0.00370974	-0.718762	1	-0.0764991	1
Up-regulated	ENSG00000139572	GPR84	protein_coding	2.81859	0.0952441	2.36765	0.0494811	1.1284	1	0.661004	1
Down-regulated	ENSG00000233901	LINC01503	lncRNA	-3.39522	0.634803	-4.85312	0.00285726	0.846978	1	-0.593093	1
Down-regulated	ENSG00000178226	PRSS36	protein_coding	-1.92564	0.344559	-2.06798	0.0260416	0.0275611	1	-0.130413	1
Down-regulated	ENSG00000151117	TMEM86A	protein_coding	-2.22541	0.119854	-2.54412	0.000897085	0.22413	1	-0.10844	1
Down-regulated	ENSG00000110799	VWF	protein_coding	-2.40384	0.257576	-2.68813	0.0224645	-0.157951	1	-0.451087	1
Down-regulated	ENSG00000111729	CLEC4A	protein_coding	-2.30125	0.641377	-3.16811	0.00744051	0.184164	1	-0.673805	1
Down-regulated	ENSG00000164221	CCDC112	protein_coding	-1.23823	0.500469	-1.37018	0.0160807	0.149315	1	0.0113103	1
Down-regulated	ENSG00000137496	IL18BP	protein_coding	-1.34356	0.480851	-1.21791	0.0473931	0.0801696	1	0.193426	1
Down-regulated	ENSG00000122986	HVCN1	protein_coding	-1.13553	0.209886	-1.02636	0.0235151	-0.206417	1	-0.106991	1
Down-regulated	ENSG00000103490	PYCARD	protein_coding	-1.16497	0.478636	-1.27531	0.0281859	0.0297659	1	-0.0904871	1
Down-regulated	ENSG00000116983	HPCAL4	protein_coding	-0.919683	1	-1.31844	0.0213645	-0.129161	1	-0.530243	1
Down-regulated	ENSG00000241399	CD302	protein_coding	-2.0401	0.27549	-2.04236	0.00327155	0.128591	1	0.117884	1
Down-regulated	ENSG00000143382	ADAMTSL4	protein_coding	-3.2552	0.313755	-3.58074	0.00440279	-0.0471358	1	-0.383777	1
Down-regulated	ENSG00000175857	GAPT	protein_coding	-1.70951	0.478181	-2.53735	0.0198273	0.577951	1	-0.26912	1
Down-regulated	ENSG00000261371	PECAM1	protein_coding	-1.38525	0.485146	-1.99393	0.0293005	0.712181	1	0.0832945	1
Down-regulated	ENSG00000214063	TSPAN4	protein_coding	-2.11553	0.220913	-2.30432	0.00288779	0.521788	1	0.315438	1
Down-regulated	ENSG00000069424	KCNAB2	protein_coding	-1.01605	0.822841	-1.19983	0.0434122	-0.107165	1	-0.296939	1
Down-regulated	ENSG00000176049	JAKMIP2	protein_coding	-1.45913	0.287648	-1.52186	0.00976964	0.455261	1	0.379846	1
Down-regulated	ENSG00000065361	ERBB3	protein_coding	-1.70499	0.558571	-2.08358	0.00216104	0.568192	1	0.183719	1
Down-regulated	ENSG00000145431	PDGFC	protein_coding	-2.21968	0.0520476	-3.56972	5.89766e-05	0.0749639	1	-1.29274	1
Down-regulated	ENSG00000127528	KLF2	protein_coding	-0.837014	1	-1.10459	0.0489213	-0.125498	1	-0.396225	1
Down-regulated	ENSG00000187554	TLR5	protein_coding	-1.65912	0.876041	-2.87105	0.00126721	0.360638	1	-0.877918	1
Down-regulated	ENSG00000147443	DOK2	protein_coding	-1.78061	0.0610962	-2.01302	0.000478592	0.0590909	1	-0.181917	1
Down-regulated	ENSG00000155254	MARVELD1	protein_coding	-3.10954	0.0662814	-3.03749	0.00126721	0.027409	1	0.103063	1
Down-regulated	ENSG00000175147	TMEM51-AS1	lncRNA	-1.33175	1	-3.16314	0.0265999	0.448245	1	-1.39672	1
Down-regulated	ENSG00000131724	IL13RA1	protein_coding	-2.0399	0.0656819	-1.73404	0.0281806	-0.292745	1	0.00410189	1
Down-regulated	ENSG00000166501	PRKCB	protein_coding	-0.788893	0.811565	-1.05221	0.0156162	0.0651436	1	-0.201177	1
Down-regulated	ENSG00000176834	VSIG10	protein_coding	-1.92735	0.178717	-1.98864	0.00561201	0.292305	1	0.226166	1
Down-regulated	ENSG00000132386	SERPINF1	protein_coding	-2.47226	0.332854	-1.92414	0.0431471	0.024604	1	0.535191	1
Down-regulated	ENSG00000146005	PSD2	protein_coding	-2.25586	0.485865	-2.2569	0.0156162	-0.407534	1	-0.414453	1
Down-regulated	ENSG00000204219	TCEA3	protein_coding	-1.17582	1	-1.49122	0.0447934	0.239857	1	-0.0829534	1
Down-regulated	ENSG00000092067	CEBPE	protein_coding	-1.71914	0.61805	-2.44757	0.0325225	0.434348	1	-0.315389	1
Down-regulated	ENSG00000227039	ITGB2-AS1	lncRNA	-1.5557	0.355625	-1.66435	0.00264978	-0.46195	1	-0.574561	1
Down-regulated	ENSG00000158270	COLEC12	protein_coding	-1.94193	0.706613	-2.82529	0.0249002	-0.408642	1	-1.30024	1
Down-regulated	ENSG00000152932	RAB3C	protein_coding	-1.99854	1	-4.86149	0.000942018	1.41657	1	-1.43544	1
Down-regulated	ENSG00000168268	NT5DC2	protein_coding	-1.64202	0.102261	-2.20991	0.00285874	0.947784	1	0.367679	1
Down-regulated	ENSG00000185483	ROR1	protein_coding	-1.7992	0.26477	-2.12707	0.0268347	0.867667	1	0.532754	1
Down-regulated	ENSG00000157978	LDLRAP1	protein_coding	-0.943447	0.496314	-1.12787	0.00520856	0.0392632	1	-0.15224	1
Down-regulated	ENSG00000167261	DPEP2	protein_coding	-1.40284	0.0604463	-1.59363	0.0258181	-0.0320138	1	-0.224559	1
Down-regulated	ENSG00000161944	ASGR2	protein_coding	-3.74594	0.119854	-4.54177	0.00685788	0.789149	1	-0.0183039	1
Down-regulated	ENSG00000229754	CXCR2P1	transcribed_unprocessed_pseudogene	-4.07888	0.0773132	-3.36356	0.0341672	-0.530628	1	0.191941	1
Down-regulated	ENSG00000143412	ANXA9	protein_coding	-0.993294	1	-3.0798	0.00132799	0.410221	1	-1.70835	1
Down-regulated	ENSG00000169891	REPS2	protein_coding	-1.64418	0.500278	-1.74394	0.0418461	0.225995	1	0.106788	1
Down-regulated	ENSG00000145244	CORIN	protein_coding	-2.61629	0.280056	-2.93651	0.0132797	0.691172	1	0.396554	1
Down-regulated	ENSG00000100350	FOXRED2	protein_coding	-1.08882	0.938449	-1.2797	0.0359017	-0.0755502	1	-0.279648	1
Down-regulated	ENSG00000119457	SLC46A2	protein_coding	-1.64864	1	-5.29471	0.00179681	1.97357	1	-1.58917	1
Down-regulated	ENSG00000118515	SGK1	protein_coding	-1.75475	0.116755	-1.54169	0.0287052	0.00788802	1	0.20419	1
Down-regulated	ENSG00000176533	GNG7	protein_coding	-1.00009	0.475414	-1.22194	0.0258181	-0.195588	1	-0.425538	1
Down-regulated	ENSG00000175294	CATSPER1	protein_coding	-1.74655	0.296108	-1.61618	0.0300978	0.136465	1	0.247761	1
Down-regulated	ENSG00000074855	ANO8	protein_coding	-0.906284	0.622947	-1.14658	0.00542661	-0.00448822	1	-0.252867	1
Down-regulated	ENSG00000101842	VSIG1	protein_coding	-1.38961	0.490313	-1.83431	0.0208495	-0.112409	1	-0.553209	1
Down-regulated	ENSG00000137834	SMAD6	protein_coding	-4.17894	0.0806272	-3.22197	0.00292833	0.897238	1	1.9792	1
Down-regulated	ENSG00000107338	SHB	protein_coding	-2.6804	0.107862	-3.14734	0.000731672	0.323746	1	-0.123147	1
Down-regulated	ENSG00000138413	IDH1	protein_coding	-1.70312	0.131099	-1.62795	0.00129082	0.0487835	1	0.116152	1
Down-regulated	ENSG00000159640	ACE	protein_coding	-1.17993	1	-1.68972	0.00398447	-0.0535632	1	-0.580235	1
Down-regulated	ENSG00000035862	TIMP2	protein_coding	-2.75544	0.120062	-2.86249	0.0082525	0.271748	1	0.145684	1
Down-regulated	ENSG00000214943	GPR33	protein_coding	-4.7031	0.330624	-4.75236	0.0413055	-0.159385	1	0	1
Down-regulated	ENSG00000135253	KCP	protein_coding	-1.51885	0.796618	-1.50488	0.0261259	0.178151	1	0.179682	1
Down-regulated	ENSG00000174370	KCNJ5-AS1	lncRNA	-2.61437	0.0918675	-2.59223	0.00412037	0.0400734	1	0.0615828	1
Down-regulated	ENSG00000162174	ASRGL1	protein_coding	-2.66861	0.0656819	-2.6149	0.00163037	0.251583	1	0.282432	1
Down-regulated	ENSG00000236700	LINC01010	lncRNA	-2.79321	0.076275	-2.32425	0.0461451	-0.603607	1	-0.147256	1
Down-regulated	ENSG00000205269	TMEM170B	protein_coding	-1.05157	0.529515	-1.14491	0.0265591	0.0495303	1	-0.0508929	1
Down-regulated	ENSG00000172985	SH3RF3	protein_coding	-1.04206	1	-1.39829	0.0490448	0.0378281	1	-0.326795	1
Down-regulated	ENSG00000141527	CARD14	protein_coding	-2.29045	0.311305	-3.06494	0.00738821	-0.145606	1	-0.854966	1
Down-regulated	ENSG00000134278	SPIRE1	protein_coding	-1.49223	0.121707	-1.47495	0.00252968	0.0682091	1	0.0713435	1
Down-regulated	ENSG00000186205	MTARC1	protein_coding	-0.024621	1	-2.89265	0.00656419	1.06543	1	-1.81649	1
Down-regulated	ENSG00000207087	RNU6-242P	snRNA	0.268927	1	-3.24909	0.0346523	0.309665	1	-3.17336	1
Down-regulated	ENSG00000162444	RBP7	protein_coding	-3.13798	0.315527	-3.10371	0.0144678	0.279748	1	0.299364	1
Down-regulated	ENSG00000178789	CD300LB	protein_coding	-1.75085	0.269938	-3.4157	0.00112545	-0.192925	1	-1.8732	1
Down-regulated	ENSG00000236403	ENSG00000236403	lncRNA	-4.34081	0.386194	-5.13723	0.0100756	0.598085	1	0	1
Down-regulated	ENSG00000214688	C10orf105	protein_coding	-1.78404	1	-3.02324	0.0309045	0.247739	1	-0.967505	1
Down-regulated	ENSG00000114812	VIPR1	protein_coding	-0.893671	1	-1.13898	0.0163591	-0.291849	1	-0.541363	1
Down-regulated	ENSG00000090013	BLVRB	protein_coding	-2.08685	0.103093	-2.22311	0.00234362	0.294927	1	0.142943	1
Down-regulated	ENSG00000143110	C1orf162	protein_coding	-1.10722	0.603614	-1.58497	0.000427081	0.308853	1	-0.179614	1
Down-regulated	ENSG00000214402	LCNL1	protein_coding	-1.95037	1	-2.88996	0.0262727	0.0185708	1	-0.93828	1
Down-regulated	ENSG00000123384	LRP1	protein_coding	-3.15527	0.0696376	-2.81663	0.0309819	0.458916	1	0.77667	1
Down-regulated	ENSG00000137841	PLCB2	protein_coding	-1.00919	0.334165	-1.10869	0.0294059	-0.0318973	1	-0.137475	1
Down-regulated	ENSG00000083444	PLOD1	protein_coding	-1.32071	0.466824	-1.32204	0.0260416	0.268208	1	0.256548	1
Down-regulated	ENSG00000172794	RAB37	protein_coding	-1.64361	0.506028	-2.07158	0.00598798	-0.292225	1	-0.721238	1
Down-regulated	ENSG00000135838	NPL	protein_coding	-2.74023	0.0713344	-2.75459	0.00500387	0.621682	1	0.588698	1
Down-regulated	ENSG00000183691	NOG	protein_coding	-1.0629	1	-1.70605	0.0122611	-0.0310082	1	-0.684168	1
Down-regulated	ENSG00000100300	TSPO	protein_coding	-1.10276	0.466824	-1.02682	0.0265591	-0.212818	1	-0.151646	1
Down-regulated	ENSG00000188305	PEAK3	protein_coding	-2.51037	0.115035	-2.51421	0.0292731	0.469208	1	0.451879	1
Down-regulated	ENSG00000111144	LTA4H	protein_coding	-1.48017	0.156273	-1.40021	0.0042819	-0.074546	1	-0.00874271	1
Down-regulated	ENSG00000059377	TBXAS1	protein_coding	-1.86071	0.108376	-1.71849	0.00709051	0.403308	1	0.532323	1
Down-regulated	ENSG00000274376	ADAMTS7P1	transcribed_unprocessed_pseudogene	-1.71475	0.269938	-2.17796	0.0387275	0.680272	1	0.264031	1
Down-regulated	ENSG00000120057	SFRP5	protein_coding	-2.20532	0.363456	-2.77038	0.00833377	0.987288	1	0.454184	1
Down-regulated	ENSG00000173578	XCR1	protein_coding	-3.52654	0.233149	-3.45565	0.0443285	0.935563	1	0.988362	1
Down-regulated	ENSG00000138336	TET1	protein_coding	-1.15064	1	-1.81747	0.00926426	-0.508343	1	-1.17803	1
Down-regulated	ENSG00000064201	TSPAN32	protein_coding	-1.47559	0.213302	-1.91408	0.0120235	-0.190952	1	-0.626069	1
Down-regulated	ENSG00000175866	BAIAP2	protein_coding	-1.10175	0.63644	-1.34119	0.0480003	0.24106	1	-0.00714585	1
Down-regulated	ENSG00000073060	SCARB1	protein_coding	-1.39875	0.518792	-1.31583	0.0352403	0.351703	1	0.417094	1
Down-regulated	ENSG00000110077	MS4A6A	protein_coding	-4.99831	0.0903104	-5.11743	0.00282841	-0.00657343	1	-0.151495	1
Down-regulated	ENSG00000106018	VIPR2	protein_coding	-1.04819	1	-1.65405	0.0140109	-1.33826	1	-1.96873	0.776888
Down-regulated	ENSG00000257495	KRT73-AS1	lncRNA	-1.30673	1	-2.88761	0.00136046	0.576673	1	-0.984641	1
Down-regulated	ENSG00000196372	ASB13	protein_coding	-0.988981	1	-1.1631	0.0466633	-0.188918	1	-0.374233	1
Down-regulated	ENSG00000170448	NFXL1	protein_coding	-1.25149	0.538186	-2.47511	0.00086328	1.19538	1	-0.0218156	1
Down-regulated	ENSG00000130208	APOC1	protein_coding	-0.997253	1	-2.50075	0.00972759	0.102434	1	-1.39034	1
Down-regulated	ENSG00000146376	ARHGAP18	protein_coding	-2.10193	0.0520476	-2.29873	0.00202952	0.195228	1	-0.0136274	1
Down-regulated	ENSG00000242498	ARPIN	protein_coding	-3.78251	0.0546544	-3.40729	0.0233182	0.479781	1	0.847713	1
Down-regulated	ENSG00000242324	ENSG00000242324	unprocessed_pseudogene	-3.71144	0.411253	-5.05554	0.0108162	-0.543642	1	-1.77063	1
Down-regulated	ENSG00000169507	SLC38A11	protein_coding	-1.41497	1	-2.08089	0.0349421	-0.239905	1	-0.943645	1
Down-regulated	ENSG00000142669	SH3BGRL3	protein_coding	-1.07763	0.389298	-1.07943	0.0349421	-0.0402747	1	-0.0503288	1
Down-regulated	ENSG00000186815	TPCN1	protein_coding	-1.23543	0.113299	-1.57465	0.000286249	0.194399	1	-0.154844	1
Down-regulated	ENSG00000108405	P2RX1	protein_coding	-1.43269	0.255469	-1.48541	0.0117256	-0.0520081	1	-0.117884	1
Down-regulated	ENSG00000173599	PC	protein_coding	-1.03979	1	-1.54186	0.0268347	0.197605	1	-0.312291	1
Down-regulated	ENSG00000174469	CNTNAP2	protein_coding	-1.67087	0.612669	-1.8992	0.01562	-0.011414	1	-0.262848	1
Down-regulated	ENSG00000124507	PACSIN1	protein_coding	-1.18869	1	-1.96925	0.0201121	-0.00152819	1	-0.785143	1
Down-regulated	ENSG00000038945	MSR1	protein_coding	-3.46125	0.415424	-3.59775	0.0417293	0.0889832	1	-0.068622	1
Down-regulated	ENSG00000233038	PTPRN2-AS1	lncRNA	-5.9468	0.103684	-3.96655	0.0467957	0.229677	1	2.29115	1
Down-regulated	ENSG00000172725	CORO1B	protein_coding	-1.38937	0.289737	-1.45777	0.04562	0.277626	1	0.191588	1
Down-regulated	ENSG00000111249	CUX2	protein_coding	-2.3196	0.888768	-3.32689	0.0402344	-0.210042	1	-1.12416	1
Down-regulated	ENSG00000258810	ENSG00000258810	lncRNA	-3.19804	0.410716	-4.14034	0.00282719	1.63969	1	0.730987	1
Down-regulated	ENSG00000146215	CRIP3	protein_coding	-1.25067	1	-1.37641	0.0409185	-0.665373	1	-0.818684	1
Down-regulated	ENSG00000077063	CTTNBP2	protein_coding	-1.98709	0.265549	-2.82011	0.0348357	1.08597	1	0.241312	1
Down-regulated	ENSG00000274536	MIR223HG	lncRNA	-1.94561	0.231991	-2.38041	0.00370974	0.687055	1	0.232411	1
Down-regulated	ENSG00000181444	ZNF467	protein_coding	-1.77657	0.624754	-1.87974	0.035249	0.723022	1	0.604558	1
Down-regulated	ENSG00000134830	C5AR2	protein_coding	-2.65687	0.0651068	-2.84913	0.0291939	0.924096	1	0.703969	1
Down-regulated	ENSG00000287626	ENSG00000287626	lncRNA	-3.96952	0.19861	-3.63446	0.0143547	-0.228644	1	0.119292	1
Down-regulated	ENSG00000137809	ITGA11	protein_coding	-2.79528	1	-4.59087	0.00184556	-0.879684	1	-2.64215	1
Down-regulated	ENSG00000147614	ATP6V0D2	protein_coding	-3.22372	0.258574	-4.5445	0.00190196	0.0732896	1	-1.26391	1
Down-regulated	ENSG00000100364	KIAA0930	protein_coding	-1.51463	0.117761	-1.53036	0.00348686	-0.160224	1	-0.187645	1
Down-regulated	ENSG00000047648	ARHGAP6	protein_coding	-1.2542	1	-2.99416	0.0157846	0.599323	1	-1.1477	1
Down-regulated	ENSG00000178585	CTNNBIP1	protein_coding	-1.25337	0.268658	-1.37871	0.00902473	0.274429	1	0.141979	1
Down-regulated	ENSG00000257838	OTOAP1	transcribed_unprocessed_pseudogene	-2.36957	0.856838	-2.71416	0.0474274	-0.396209	1	-0.757798	1
Down-regulated	ENSG00000140675	SLC5A2	protein_coding	-0.587756	1	-1.38758	0.0460049	0.0322455	1	-0.778656	1
Down-regulated	ENSG00000071967	CYBRD1	protein_coding	-2.56546	0.165612	-2.54893	0.00234362	0.416086	1	0.421494	1
Down-regulated	ENSG00000225177	NHSL1-AS1	lncRNA	-1.8516	1	-3.02204	0.0017241	0.413552	1	-0.717619	1
Down-regulated	ENSG00000158062	UBXN11	protein_coding	-0.90343	0.49149	-1.11544	0.00680295	0.0114856	1	-0.205896	1
Down-regulated	ENSG00000116147	TNR	protein_coding	-1.06602	1	-3.88	0.0472335	0.283506	1	-2.47563	1
Down-regulated	ENSG00000107282	APBA1	protein_coding	-1.70207	0.589037	-2.04079	0.00399826	0.00805787	1	-0.355363	1
Down-regulated	ENSG00000053918	KCNQ1	protein_coding	-1.09368	0.702819	-1.53798	0.00276053	0.0978454	1	-0.359524	1
Down-regulated	ENSG00000139193	CD27	protein_coding	-0.699797	1	-1.0916	0.0416691	0.111754	1	-0.286628	1
Down-regulated	ENSG00000174348	PODN	protein_coding	-2.41257	1	-3.12894	0.0264813	-0.362441	1	-1.07216	1
Down-regulated	ENSG00000181291	TMEM132E	protein_coding	-0.828097	1	-2.63321	0.00577142	-0.130801	1	-1.91737	1
Down-regulated	ENSG00000289100	ENSG00000289100	lncRNA	-1.56314	0.290344	-1.51931	0.0310658	0.366504	1	0.400378	1
Down-regulated	ENSG00000167895	TMC8	protein_coding	-1.09328	0.72057	-1.37149	0.0265591	-0.411061	1	-0.694085	1
Down-regulated	ENSG00000101307	SIRPB1	protein_coding	-2.43118	0.666794	-3.54544	0.000147909	-0.43069	1	-1.54441	1
Down-regulated	ENSG00000072210	ALDH3A2	protein_coding	-0.917966	0.221483	-1.00696	0.0124142	-0.0701901	1	-0.169006	1
Down-regulated	ENSG00000118557	PMFBP1	protein_coding	-2.34597	0.390916	-3.27874	0.00264978	0.496727	1	-0.412098	1
Down-regulated	ENSG00000149639	SOGA1	protein_coding	-1.372	0.0651068	-1.62421	0.00412037	-0.0459822	1	-0.313629	1
Down-regulated	ENSG00000162390	ACOT11	protein_coding	-2.16617	0.105136	-2.47715	0.00119213	0.156656	1	-0.163842	1
Down-regulated	ENSG00000267727	ENSG00000267727	lncRNA	-2.93419	1	-3.84444	0.0285422	0.204389	1	-0.680965	1
Down-regulated	ENSG00000197467	COL13A1	protein_coding	-1.42522	1	-2.35694	0.0465673	0.494391	1	-0.406952	1
Down-regulated	ENSG00000036530	CYP46A1	protein_coding	-0.915088	1	-2.07232	0.0117069	0.852617	1	-0.315704	1
Down-regulated	ENSG00000151790	TDO2	protein_coding	-2.40824	1	-5.21638	0.0251778	2.77251	1	-0.19556	1
Down-regulated	ENSG00000132170	PPARG	protein_coding	-2.53402	0.125616	-3.52634	0.00158662	0.674566	1	-0.31418	1
Down-regulated	ENSG00000006638	TBXA2R	protein_coding	-1.53751	0.811565	-2.01847	0.0079481	0.150386	1	-0.332796	1
Down-regulated	ENSG00000165272	AQP3	protein_coding	-0.991505	0.735126	-1.16881	0.0157846	-0.30419	1	-0.488636	1
Down-regulated	ENSG00000159788	RGS12	protein_coding	-1.79477	0.13191	-1.92224	0.00199256	0.204786	1	0.0720415	1
Down-regulated	ENSG00000288046	ENSG00000288046	lncRNA	-3.68434	1	-3.63577	0.0462245	2.10653	1	2.21628	1
Down-regulated	ENSG00000215458	AATBC	lncRNA	-2.56305	0.287648	-2.6141	0.0164593	-0.609499	1	-0.663303	1
Down-regulated	ENSG00000007968	E2F2	protein_coding	-2.02669	0.389043	-2.18633	0.0021482	0.235256	1	0.0513873	1
Down-regulated	ENSG00000271447	MMP28	protein_coding	-1.85596	0.696542	-2.31675	0.00801039	-0.0172511	1	-0.500929	1
Down-regulated	ENSG00000104880	ARHGEF18	protein_coding	-0.778123	0.650683	-1.00373	0.0437557	0.204664	1	-0.0267505	1
Down-regulated	ENSG00000130304	SLC27A1	protein_coding	-1.30609	0.257576	-1.28781	0.0398364	0.162919	1	0.172637	1
Down-regulated	ENSG00000188060	RAB42	protein_coding	-5.11595	0.0806272	-5.79881	0.00297054	0.891218	1	0.187667	1
Down-regulated	ENSG00000185187	SIGIRR	protein_coding	-1.24308	0.0711077	-1.39691	0.0222117	-0.0531697	1	-0.209773	1
Down-regulated	ENSG00000283213	ENSG00000283213	lncRNA	-3.92256	1	-5.4421	0.00841867	1.35901	1	0	1
Down-regulated	ENSG00000174697	LEP	protein_coding	-4.77604	0.694449	-7.22067	0.000894607	2.26692	1	0	1
Down-regulated	ENSG00000114248	LRRC31	protein_coding	-0.551397	1	-3.65875	0.04212	3.55094	1	0.455129	1
Down-regulated	ENSG00000100346	CACNA1I	protein_coding	-1.17447	1	-1.54196	0.00557211	-0.434751	1	-0.806504	1
Down-regulated	ENSG00000105514	RAB3D	protein_coding	-1.31348	0.296108	-1.29712	0.0205157	0.207903	1	0.215516	1
Down-regulated	ENSG00000272953	ENSG00000272953	lncRNA	-3.65982	0.832516	-4.2322	0.00910878	1.63835	1	1.18554	1
Down-regulated	ENSG00000042980	ADAM28	protein_coding	-1.29174	0.515653	-1.35649	0.0310658	0.0099845	1	-0.0568617	1
Down-regulated	ENSG00000154027	AK5	protein_coding	-0.999097	1	-1.97048	0.00728397	-0.757978	1	-1.73998	1
Down-regulated	ENSG00000128218	VPREB3	protein_coding	-1.13107	1	-1.90357	0.00923912	0.138866	1	-0.64533	1
Down-regulated	ENSG00000170425	ADORA2B	protein_coding	-1.97344	1	-2.36929	0.0259467	0.213812	1	-0.2135	1
Down-regulated	ENSG00000171659	GPR34	protein_coding	-2.21481	1	-3.05201	0.0348357	1.55869	1	0.699821	1
Down-regulated	ENSG00000186049	KRT73	protein_coding	-1.24394	1	-1.44798	0.0389451	-0.846999	1	-1.06239	1
Down-regulated	ENSG00000069188	SDK2	protein_coding	-1.88397	0.178615	-2.29524	0.00801039	-0.93079	1	-1.34423	1
Down-regulated	ENSG00000075240	GRAMD4	protein_coding	-1.74746	0.0520147	-1.74846	0.000261668	0.307449	1	0.2909	1
Down-regulated	ENSG00000166793	YPEL4	protein_coding	-1.3187	0.277031	-1.37448	0.0143547	-0.176463	1	-0.234675	1
Down-regulated	ENSG00000171094	ALK	protein_coding	-3.11991	1	-4.99181	0.0433743	1.68772	1	0	1
Down-regulated	ENSG00000143167	GPA33	protein_coding	-0.988355	1	-1.37896	0.0355176	0.310362	1	-0.0847243	1
Down-regulated	ENSG00000170275	CRTAP	protein_coding	-0.89531	0.446509	-1.04962	0.00685788	0.118587	1	-0.0414872	1
Down-regulated	ENSG00000160789	LMNA	protein_coding	-1.22812	0.315139	-1.51207	0.0240374	0.020841	1	-0.273067	1
Down-regulated	ENSG00000197506	SLC28A3	protein_coding	-3.61775	0.111957	-3.29437	0.0274446	-1.05086	1	-0.72929	1
Down-regulated	ENSG00000260078	MPHOSPH10P1	transcribed_unprocessed_pseudogene	-3.09791	0.350012	-3.32281	0.029069	-0.503824	1	-0.724815	1
Down-regulated	ENSG00000076351	SLC46A1	protein_coding	-2.29855	0.134705	-2.64679	0.000723119	0.107151	1	-0.265285	1
Down-regulated	ENSG00000114770	ABCC5	protein_coding	-0.939455	0.322022	-1.04417	0.0293268	-0.0152906	1	-0.126169	1
Down-regulated	ENSG00000115318	LOXL3	protein_coding	-2.37815	0.185139	-2.44207	0.00799811	0.37329	1	0.301956	1
Down-regulated	ENSG00000122043	LINC00544	lncRNA	-1.15116	1	-2.09816	0.0294059	-0.479925	1	-1.43894	1
Down-regulated	ENSG00000108828	VAT1	protein_coding	-1.27529	0.313117	-1.32447	0.00289602	0.0293348	1	-0.0347398	1
Down-regulated	ENSG00000090975	PITPNM2	protein_coding	-1.09963	0.740315	-1.34934	0.00220915	-0.2997	1	-0.55883	1
Down-regulated	ENSG00000167914	GSDMA	protein_coding	-1.5894	1	-2.01179	0.000917283	0.0341596	1	-0.413936	1
Down-regulated	ENSG00000214193	SH3D21	protein_coding	-1.27774	0.490846	-1.33653	0.0465286	0.139468	1	0.06947	1
Down-regulated	ENSG00000249667	LINC01259	lncRNA	-1.57637	0.759293	-2.38762	0.0120235	0.108426	1	-0.687199	1
Down-regulated	ENSG00000131355	ADGRE3	protein_coding	-2.51251	1	-3.15103	0.0291939	-1.33755	1	-1.96744	1
Down-regulated	ENSG00000162066	AMDHD2	protein_coding	-0.928543	0.396143	-1.00932	0.00976964	-0.0330187	1	-0.126603	1
Down-regulated	ENSG00000275719	ENSG00000275719	lncRNA	-2.15529	0.248401	-1.99094	0.0469161	-0.430121	1	-0.268324	1
Down-regulated	ENSG00000121933	TMIGD3	protein_coding	-4.39637	0.164938	-4.56606	0.00912175	1.68828	1	1.52667	1
Down-regulated	ENSG00000185432	METTL7A	protein_coding	-1.67836	0.0546544	-2.00513	0.00353518	0.103865	1	-0.234306	1
Down-regulated	ENSG00000125089	SH3TC1	protein_coding	-1.38109	0.0806272	-1.4625	0.00701151	-0.335122	1	-0.428457	1
Down-regulated	ENSG00000154102	C16orf74	protein_coding	-1.8811	0.110613	-2.39256	0.0108692	0.109602	1	-0.400078	1
Down-regulated	ENSG00000092068	SLC7A8	protein_coding	-3.23889	0.0502538	-4.86247	6.94637e-05	1.49306	1	-0.147244	1
Down-regulated	ENSG00000267364	ENSG00000267364	lncRNA	-1.1384	0.845038	-1.40947	0.044071	-0.118516	1	-0.399848	1
Down-regulated	ENSG00000105520	PLPPR2	protein_coding	-1.13352	0.313117	-1.19909	0.0199232	0.169163	1	0.0928523	1
Down-regulated	ENSG00000136295	TTYH3	protein_coding	-2.05514	0.13129	-2.294	0.0235151	0.535111	1	0.27184	1
Down-regulated	ENSG00000172867	KRT2	protein_coding	-3.45086	0.123415	-3.30298	0.0132322	-0.420364	1	-0.225998	1
Down-regulated	ENSG00000179163	FUCA1	protein_coding	-3.4951	0.069151	-3.29468	0.00124759	-0.280913	1	-0.0935299	1
Down-regulated	ENSG00000166068	SPRED1	protein_coding	-2.4017	0.154631	-2.15154	0.0427801	0.271163	1	0.505336	1
Down-regulated	ENSG00000115648	MLPH	protein_coding	-4.10546	1	-4.71922	0.0297327	0.455893	1	0	1
Down-regulated	ENSG00000141505	ASGR1	protein_coding	-2.77961	0.287847	-2.7638	0.0205157	-0.258813	1	-0.271728	1
Down-regulated	ENSG00000168546	GFRA2	protein_coding	-3.03944	0.325777	-4.09847	0.00598284	0.915199	1	-0.160361	1
Down-regulated	ENSG00000136160	EDNRB	protein_coding	-1.51061	1	-2.97906	0.0115948	1.46473	1	-0.00616905	1
Down-regulated	ENSG00000188483	IER5L	protein_coding	-2.18086	0.0784769	-1.69818	0.04212	-0.0160315	1	0.448665	1
Down-regulated	ENSG00000130881	LRP3	protein_coding	-3.80884	0.0641683	-2.83864	0.00929349	-0.557787	1	0.482604	1

## Sheet: Table_S7
Supplementary Table S7. List of primers used in this study.
Gene	Forward Primer	Reverse Primer	Expected PCR Product Size (bp)
RPLP0	TCGACAATGGCAGCATCTAC	ATCCGTCTCCACAGACAAGG	191
TNF	CTGCACTTTGGAGTGATCGG	TCAGCTTGAGGGTTTGCTAC	146
CXCL10	AAGTGGCATTCAAGGAGTACC	ATGCAGGTACAGCGTACAGT	51
IL1B	GCCCTAAACAGATGAAGTGCTC	GAGATTCGTAGCTGGATGCC	76
IL8	TCTGTGTGAAGGTGCAGTTTT	GGGGTGGAAAGGTTTGGAGTA	85
HLA-DRA	CATAAGTGGAGTCCCTGTGCTA	TCAGGATTCAGATAGAACTCGGC	120
CD80	ACGCCCTGTATAACAGTGTCC	GAGGAAGTTCCCAGAAGAGGTC	94
IFIT1	CCTCCTTGGGTTCGTCTACA	TTCTCAAAGTCAGCAGCCAGT	93
ENSG00000272512	CTCAGCAGCACAGGAAGGG	CTCCTTCCCCTTCTGCACTG	106
ENSG00000285040	CCAGCAACCACTTTCCTGAAAA	CTGGCTCAGCTTCTCTTGACT	150
ENSG00000289327	GGGCCAGAAAGTCTCCTGTC	GTGTTTGCAGGTAGGAGGGG	123
USP30-AS1	GACCGGAAGTAGCTGCCC	TGAAAACCAAGCAGCCCCA	128
USP30	TCACCTCCCAGTACTCCAGG	TCAGTAACTTCTTGGCAGGACAA	106
KCNJ2-AS1	CCTGAGGGTAGACAAGTTCACTC	TTGGCCTGTTTCTTAGAAGTCCA	118
